# Supplementary material for: Chemical Constituents from the Fruits of Amomum kravanh and Their Role in Activating Alcohol Dehydrogenase
Source: MDPI journal article supplement (doi:10.3390/molecules28124878), 2023-06-20
Supplement: s1 [file s1]

## Supplementary Materials

### Chemical constituents from the fruits of *Amomum kravanh* and their role in activating alcohol dehydrogenase

Hao-Ming Xiong, Hui-Ying Li, Zhi-Rong Lin, Xiao-Mei Liu, Li-Ping Bai, Wei Zhang, Zhi-Hong Jiang,\* and

Guo-Yuan Zhu\*

State Key Laboratory of Quality Research in Chinese Medicine, Guangdong-Hong Kong-Macao Joint Laboratory of Respiratory Infectious Disease, Macao Institute for Applied Research in Medicine and Health, Macau University of Science and Technology, Macau 999078, China

\* Correspondence: [zhjiang@must.edu.mo](mailto:zhjiang@must.edu.mo) (Z.-H. J.); [gyzhu@must.edu.mo](mailto:gyzhu@must.edu.mo) (G.-Y. Z.)

## Table of Contents

|                                                                                             |            |
|---------------------------------------------------------------------------------------------|------------|
| <b>Figure S1.</b> The HRESIMS spectrum of compound <b>1</b> .....                           | <b>S5</b>  |
| <b>Figure S2.</b> The $^1\text{H}$ NMR spectrum of compound <b>1</b> .....                  | <b>S5</b>  |
| <b>Figure S3.</b> The $^{13}\text{C}$ NMR spectra of compound <b>1</b> .....                | <b>S6</b>  |
| <b>Figure S4.</b> The DEPT135 spectra of compound <b>1</b> .....                            | <b>S6</b>  |
| <b>Figure S5.</b> The HSQC spectrum of compound <b>1</b> .....                              | <b>S7</b>  |
| <b>Figure S6.</b> The $^1\text{H}$ - $^1\text{H}$ COSY spectrum of compound <b>1</b> .....  | <b>S7</b>  |
| <b>Figure S7.</b> The HMBC spectrum of compound <b>1</b> .....                              | <b>S8</b>  |
| <b>Figure S8.</b> The NOESY spectrum of compound <b>1</b> .....                             | <b>S8</b>  |
| <b>Figure S9.</b> The IR spectrum of compound <b>1</b> .....                                | <b>S9</b>  |
| <b>Figure S10.</b> The UV spectrum of compound <b>1</b> .....                               | <b>S9</b>  |
| <b>Figure S11.</b> The HRESIMS spectrum of compound <b>2</b> .....                          | <b>S10</b> |
| <b>Figure S12.</b> The $^1\text{H}$ NMR spectrum of compound <b>2</b> .....                 | <b>S10</b> |
| <b>Figure S13.</b> The $^{13}\text{C}$ NMR spectra of compound <b>2</b> .....               | <b>S11</b> |
| <b>Figure S14.</b> The DEPT135 spectra of compound <b>2</b> .....                           | <b>S11</b> |
| <b>Figure S15.</b> The HSQC spectrum of compound <b>2</b> .....                             | <b>S12</b> |
| <b>Figure S16.</b> The $^1\text{H}$ - $^1\text{H}$ COSY spectrum of compound <b>2</b> ..... | <b>S12</b> |
| <b>Figure S17.</b> The HMBC spectrum of compound <b>2</b> .....                             | <b>S13</b> |
| <b>Figure S18.</b> The NOESY spectrum of compound <b>2</b> .....                            | <b>S13</b> |
| <b>Figure S19.</b> The IR spectrum of compound <b>2</b> .....                               | <b>S14</b> |
| <b>Figure S20.</b> The UV spectrum of compound <b>2</b> .....                               | <b>S14</b> |
| <b>Figure S21.</b> The HRESIMS spectrum of compound <b>3</b> .....                          | <b>S15</b> |
| <b>Figure S22.</b> The $^1\text{H}$ NMR spectrum of compound <b>3</b> .....                 | <b>S15</b> |
| <b>Figure S23.</b> The $^{13}\text{C}$ NMR spectra of compound <b>3</b> .....               | <b>S16</b> |
| <b>Figure S24.</b> The DEPT135 spectra of compound <b>3</b> .....                           | <b>S16</b> |
| <b>Figure S25.</b> The HSQC spectrum of compound <b>3</b> .....                             | <b>S17</b> |
| <b>Figure S26.</b> The $^1\text{H}$ - $^1\text{H}$ COSY spectrum of compound <b>3</b> ..... | <b>S17</b> |
| <b>Figure S27.</b> The HMBC spectrum of compound <b>3</b> .....                             | <b>S18</b> |
| <b>Figure S28.</b> The NOESY spectrum of compound <b>3</b> .....                            | <b>S18</b> |
| <b>Figure S29.</b> The IR spectrum of compound <b>3</b> .....                               | <b>S19</b> |
| <b>Figure S30.</b> The UV spectrum of compound <b>3</b> .....                               | <b>S19</b> |
| <b>Figure S31.</b> The HRESIMS spectrum of compound <b>4</b> .....                          | <b>S20</b> |
| <b>Figure S32.</b> The $^1\text{H}$ NMR spectrum of compound <b>4</b> .....                 | <b>S20</b> |
| <b>Figure S33.</b> The $^{13}\text{C}$ NMR spectra of compound <b>4</b> .....               | <b>S21</b> |
| <b>Figure S34.</b> The DEPT135 spectra of compound <b>4</b> .....                           | <b>S21</b> |
| <b>Figure S35.</b> The HSQC spectrum of compound <b>4</b> .....                             | <b>S22</b> |
| <b>Figure S36.</b> The $^1\text{H}$ - $^1\text{H}$ COSY spectrum of compound <b>4</b> ..... | <b>S22</b> |
| <b>Figure S37.</b> The HMBC spectrum of compound <b>4</b> .....                             | <b>S23</b> |
| <b>Figure S38.</b> The NOESY spectrum of compound <b>4</b> .....                            | <b>S23</b> |
| <b>Figure S39.</b> The IR spectrum of compound <b>4</b> .....                               | <b>S24</b> |
| <b>Figure S40.</b> The UV spectrum of compound <b>4</b> .....                               | <b>S24</b> |
| <b>Figure S41.</b> The HRESIMS spectrum of compound <b>5</b> .....                          | <b>S25</b> |
| <b>Figure S42.</b> The $^1\text{H}$ NMR spectrum of compound <b>5</b> .....                 | <b>S25</b> |
| <b>Figure S43.</b> The $^{13}\text{C}$ NMR spectra of compound <b>5</b> .....               | <b>S26</b> |

|                                                                                                |            |
|------------------------------------------------------------------------------------------------|------------|
| <b>Figure S44.</b> The DEPT135 spectra of compound <b>5</b> .....                              | <b>S26</b> |
| <b>Figure S45.</b> The HSQC spectrum of compound <b>5</b> .....                                | <b>S27</b> |
| <b>Figure S46.</b> The <sup>1</sup> H- <sup>1</sup> H COSY spectrum of compound <b>5</b> ..... | <b>S27</b> |
| <b>Figure S47.</b> The HMBC spectrum of compound <b>5</b> .....                                | <b>S28</b> |
| <b>Figure S48.</b> The NOESY spectrum of compound <b>5</b> .....                               | <b>S28</b> |
| <b>Figure S49.</b> The IR spectrum of compound <b>5</b> .....                                  | <b>S29</b> |
| <b>Figure S50.</b> The UV spectrum of compound <b>5</b> .....                                  | <b>S29</b> |
| <b>Figure S51.</b> The HRESIMS spectrum of compound <b>6</b> .....                             | <b>S30</b> |
| <b>Figure S52.</b> The <sup>1</sup> H NMR spectrum of compound <b>6</b> .....                  | <b>S30</b> |
| <b>Figure S53.</b> The <sup>13</sup> CNMR spectra of compound <b>6</b> .....                   | <b>S31</b> |
| <b>Figure S54.</b> The DEPT135 spectra of compound <b>6</b> .....                              | <b>S31</b> |
| <b>Figure S55.</b> The HSQC spectrum of compound <b>6</b> .....                                | <b>S32</b> |
| <b>Figure S56.</b> The <sup>1</sup> H- <sup>1</sup> H COSY spectrum of compound <b>6</b> ..... | <b>S32</b> |
| <b>Figure S57.</b> The HMBC spectrum of compound <b>6</b> .....                                | <b>S33</b> |
| <b>Figure S58.</b> The NOESY spectrum of compound <b>6</b> .....                               | <b>S33</b> |
| <b>Figure S59.</b> The IR spectrum of compound <b>6</b> .....                                  | <b>S34</b> |
| <b>Figure S60.</b> The UV spectrum of compound <b>6</b> .....                                  | <b>S34</b> |
| <b>Figure S61.</b> The HRESIMS spectrum of compound <b>7</b> .....                             | <b>S35</b> |
| <b>Figure S62.</b> The <sup>1</sup> H NMR spectrum of compound <b>7</b> .....                  | <b>S35</b> |
| <b>Figure S63.</b> The <sup>13</sup> CNMR spectra of compound <b>7</b> .....                   | <b>S36</b> |
| <b>Figure S64.</b> The DEPT135 spectra of compound <b>7</b> .....                              | <b>S36</b> |
| <b>Figure S65.</b> The HSQC spectrum of compound <b>7</b> .....                                | <b>S37</b> |
| <b>Figure S66.</b> The <sup>1</sup> H- <sup>1</sup> H COSY spectrum of compound <b>7</b> ..... | <b>S37</b> |
| <b>Figure S67.</b> The HMBC spectrum of compound <b>7</b> .....                                | <b>S38</b> |
| <b>Figure S68.</b> The NOESY spectrum of compound <b>7</b> .....                               | <b>S38</b> |
| <b>Figure S69.</b> The IR spectrum of compound <b>7</b> .....                                  | <b>S39</b> |
| <b>Figure S70.</b> The UV spectrum of compound <b>7</b> .....                                  | <b>S39</b> |
| <b>Figure S71.</b> The HRESIMS spectrum of compound <b>8</b> .....                             | <b>S40</b> |
| <b>Figure S72.</b> The <sup>1</sup> H NMR spectrum of compound <b>8</b> .....                  | <b>S40</b> |
| <b>Figure S73.</b> The <sup>13</sup> CNMR spectra of compound <b>8</b> .....                   | <b>S41</b> |
| <b>Figure S74.</b> The DEPT135 spectra of compound <b>8</b> .....                              | <b>S41</b> |
| <b>Figure S75.</b> The HSQC spectrum of compound <b>8</b> .....                                | <b>S42</b> |
| <b>Figure S76.</b> The <sup>1</sup> H- <sup>1</sup> H COSY spectrum of compound <b>8</b> ..... | <b>S42</b> |
| <b>Figure S77.</b> The HMBC spectrum of compound <b>8</b> .....                                | <b>S43</b> |
| <b>Figure S78.</b> The IR spectrum of compound <b>8</b> .....                                  | <b>S43</b> |
| <b>Figure S79.</b> The UV spectrum of compound <b>8</b> .....                                  | <b>S44</b> |
| <b>Figure S80.</b> The HRESIMS spectrum of compound <b>9</b> .....                             | <b>S44</b> |
| <b>Figure S81.</b> The <sup>1</sup> H NMR spectrum of compound <b>9</b> .....                  | <b>S45</b> |
| <b>Figure S82.</b> The <sup>13</sup> CNMR spectra of compound <b>9</b> .....                   | <b>S45</b> |
| <b>Figure S83.</b> The DEPT135 spectra of compound <b>9</b> .....                              | <b>S46</b> |
| <b>Figure S84.</b> The HSQC spectrum of compound <b>9</b> .....                                | <b>S46</b> |
| <b>Figure S85.</b> The <sup>1</sup> H- <sup>1</sup> H COSY spectrum of compound <b>9</b> ..... | <b>S47</b> |
| <b>Figure S86.</b> The HMBC spectrum of compound <b>9</b> .....                                | <b>S47</b> |
| <b>Figure S87.</b> The NOESY spectrum of compound <b>9</b> .....                               | <b>S48</b> |
| <b>Figure S88.</b> The IR spectrum of compound <b>9</b> .....                                  | <b>S48</b> |
| <b>Figure S89.</b> The UV spectrum of compound <b>9</b> .....                                  | <b>S49</b> |
| <b>Figure S90.</b> The HRESIMS spectrum of compound <b>10</b> .....                            | <b>S49</b> |

|                                                                                                                   |            |
|-------------------------------------------------------------------------------------------------------------------|------------|
| <b>Figure S91.</b> The $^1\text{H}$ NMR spectrum of compound <b>10</b> .....                                      | <b>S50</b> |
| <b>Figure S92.</b> The $^{13}\text{C}$ NMR spectra of compound <b>10</b> .....                                    | <b>S50</b> |
| <b>Figure S93.</b> The DEPT135 spectra of compound <b>10</b> .....                                                | <b>S51</b> |
| <b>Figure S94.</b> The HSQC spectrum of compound <b>10</b> .....                                                  | <b>S51</b> |
| <b>Figure S95.</b> The $^1\text{H}$ - $^1\text{H}$ COSY spectrum of compound <b>10</b> .....                      | <b>S52</b> |
| <b>Figure S96.</b> The HMBC spectrum of compound <b>10</b> .....                                                  | <b>S52</b> |
| <b>Figure S97.</b> The NOESY spectrum of compound <b>10</b> .....                                                 | <b>S53</b> |
| <b>Figure S98.</b> The IR spectrum of compound <b>10</b> .....                                                    | <b>S53</b> |
| <b>Figure S99.</b> The UV spectrum of compound <b>10</b> .....                                                    | <b>S54</b> |
| <b>Figure S100.</b> The HRESIMS spectrum of compound <b>10</b> .....                                              | <b>S54</b> |
| <b>Figure S101.</b> The $^1\text{H}$ NMR spectrum of compound <b>10</b> .....                                     | <b>S55</b> |
| <b>Figure S102.</b> The $^{13}\text{C}$ NMR spectra of compound <b>10</b> .....                                   | <b>S55</b> |
| <b>Table S1.</b> $^1\text{H}$ -NMR (600 MHz) and $^{13}\text{C}$ -NMR (150 MHz) data of compound <b>10a</b> ..... | <b>S56</b> |
| <b>Figure S103.</b> The effects of PE, EtOAc, and n-BuOH extracts on ADH activity .....                           | <b>S56</b> |



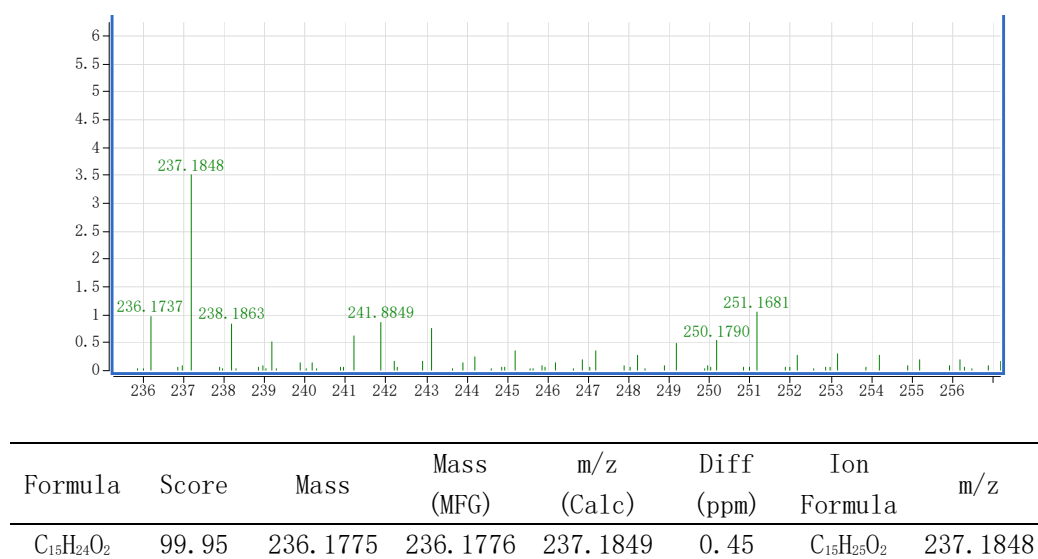

**Figure S1.** The HRESIMS spectrum of compound **1**

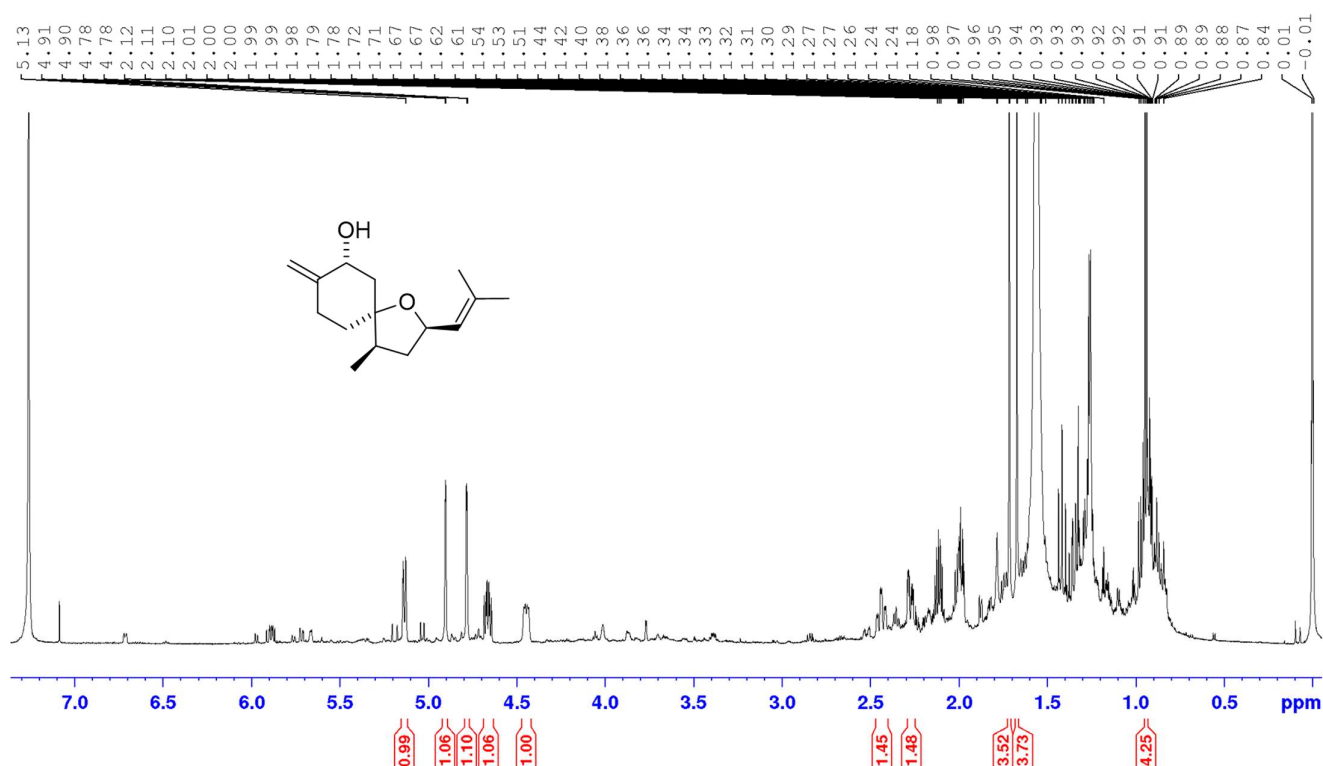

**Figure S2.** The <sup>1</sup>H NMR spectrum of compound **1**

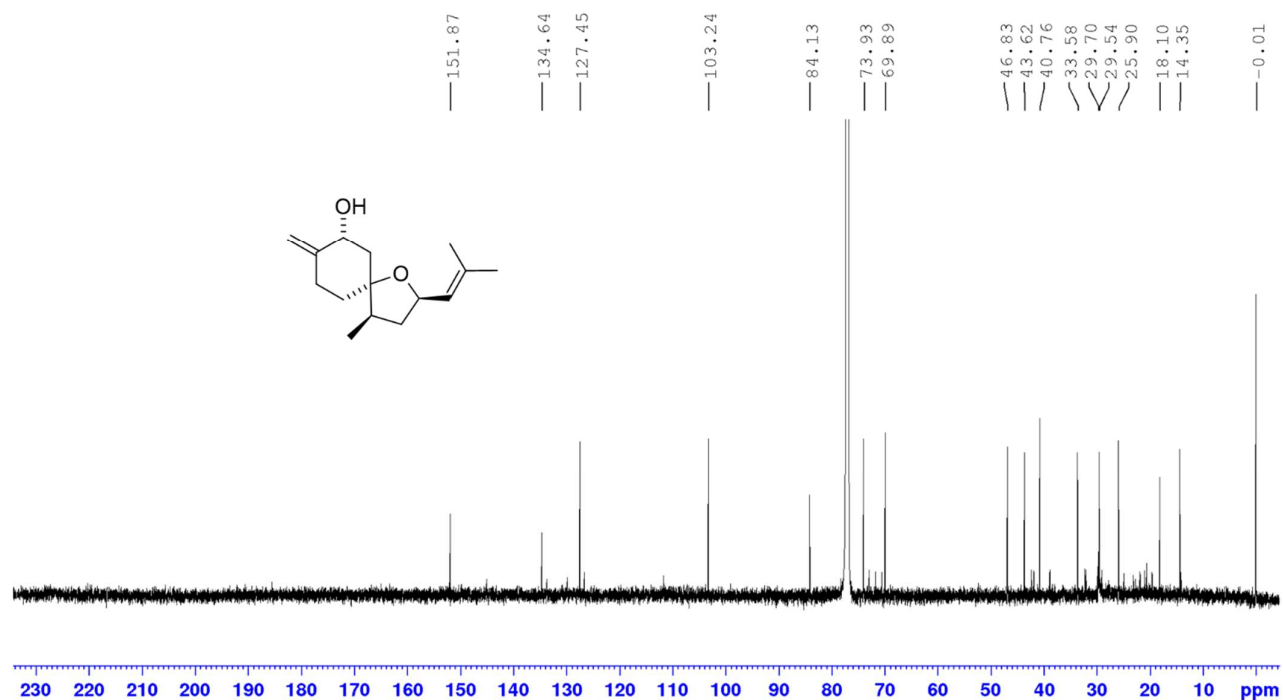

**Figure S3.** The <sup>13</sup>CNMR spectrum of compound **1**

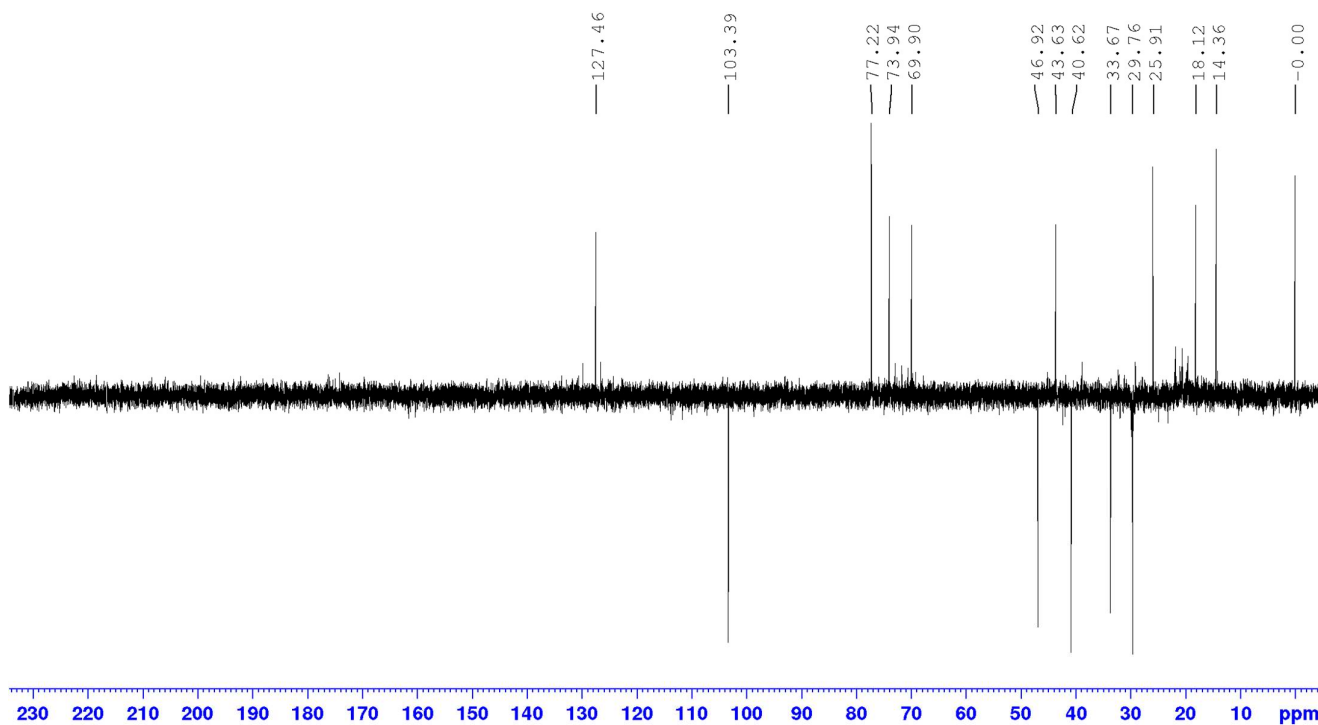

**Figure S4.** The DEPT135 spectrum of compound **1**

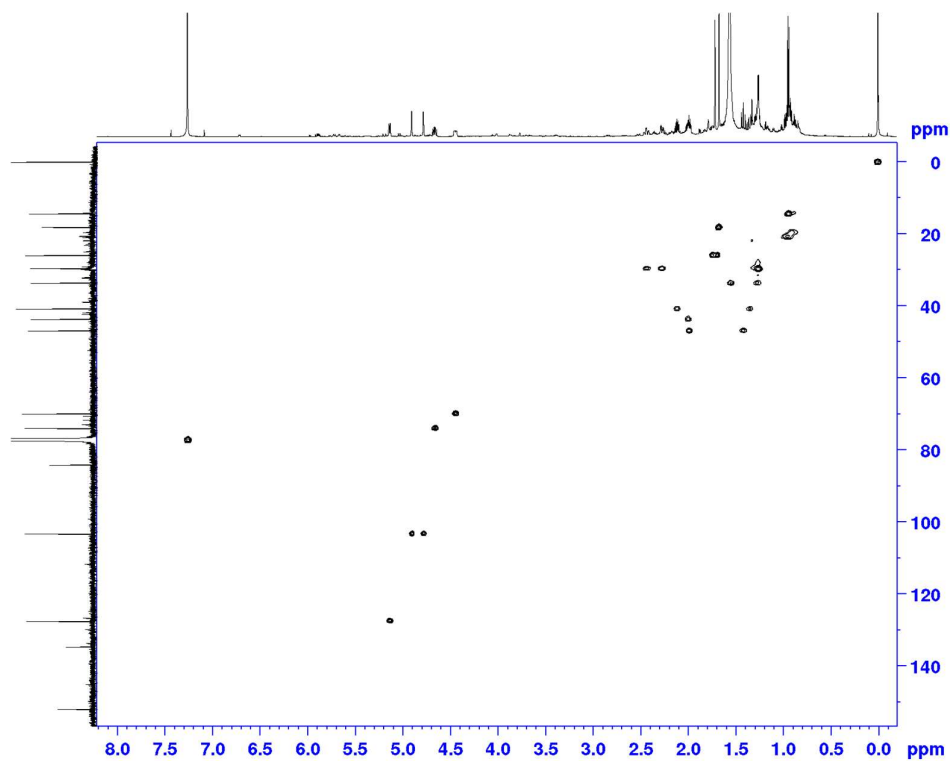

**Figure S5.** The HSQC spectrum of compound **1**

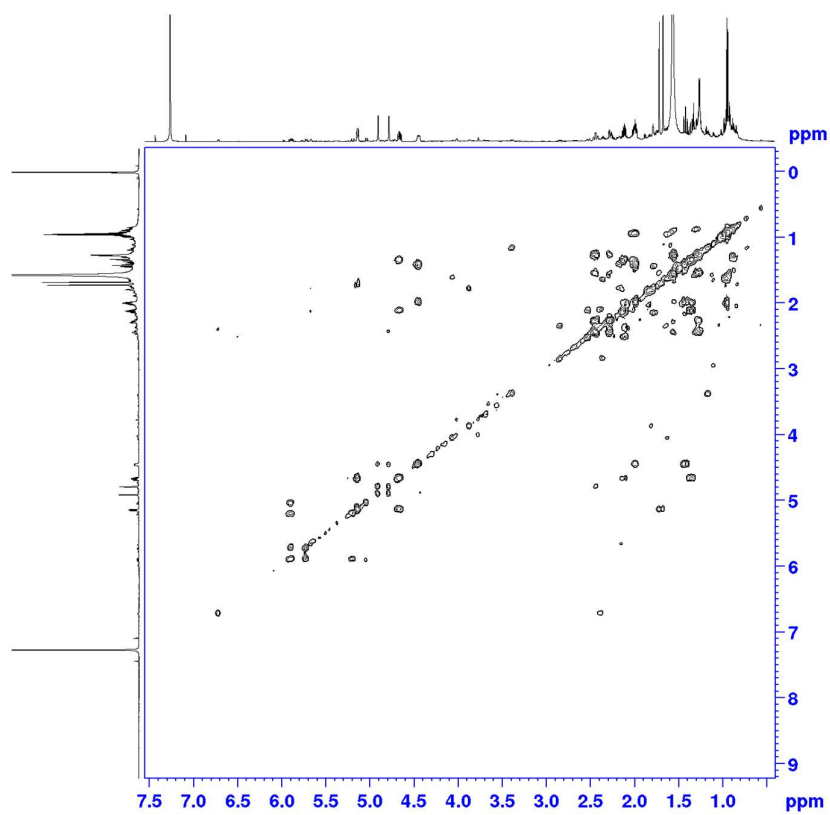

**Figure S6.** The  $^1\text{H}$ - $^1\text{H}$  COSY spectrum of compound **1**

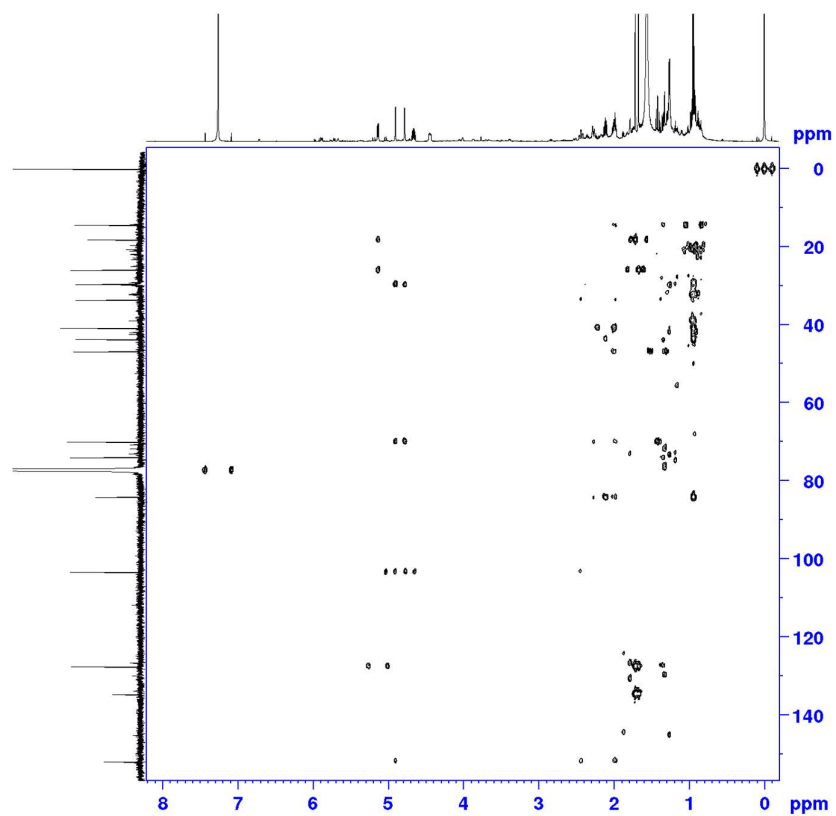

**Figure S7.** The HMBC spectrum of compound **1**

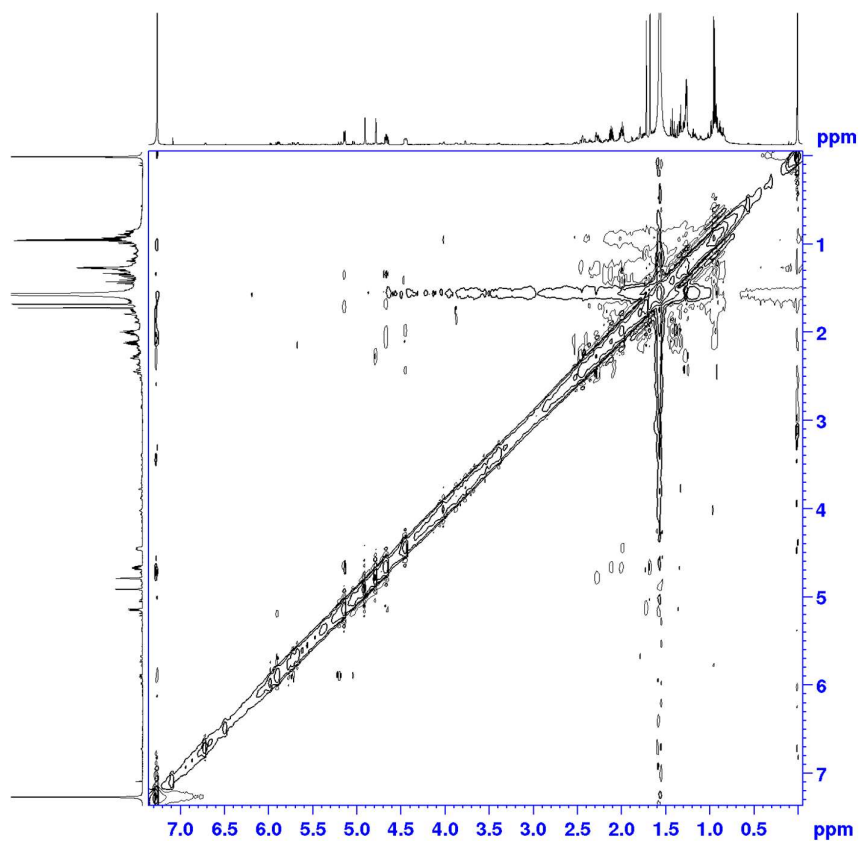

**Figure S8.** The NOESY spectrum of compound **1**

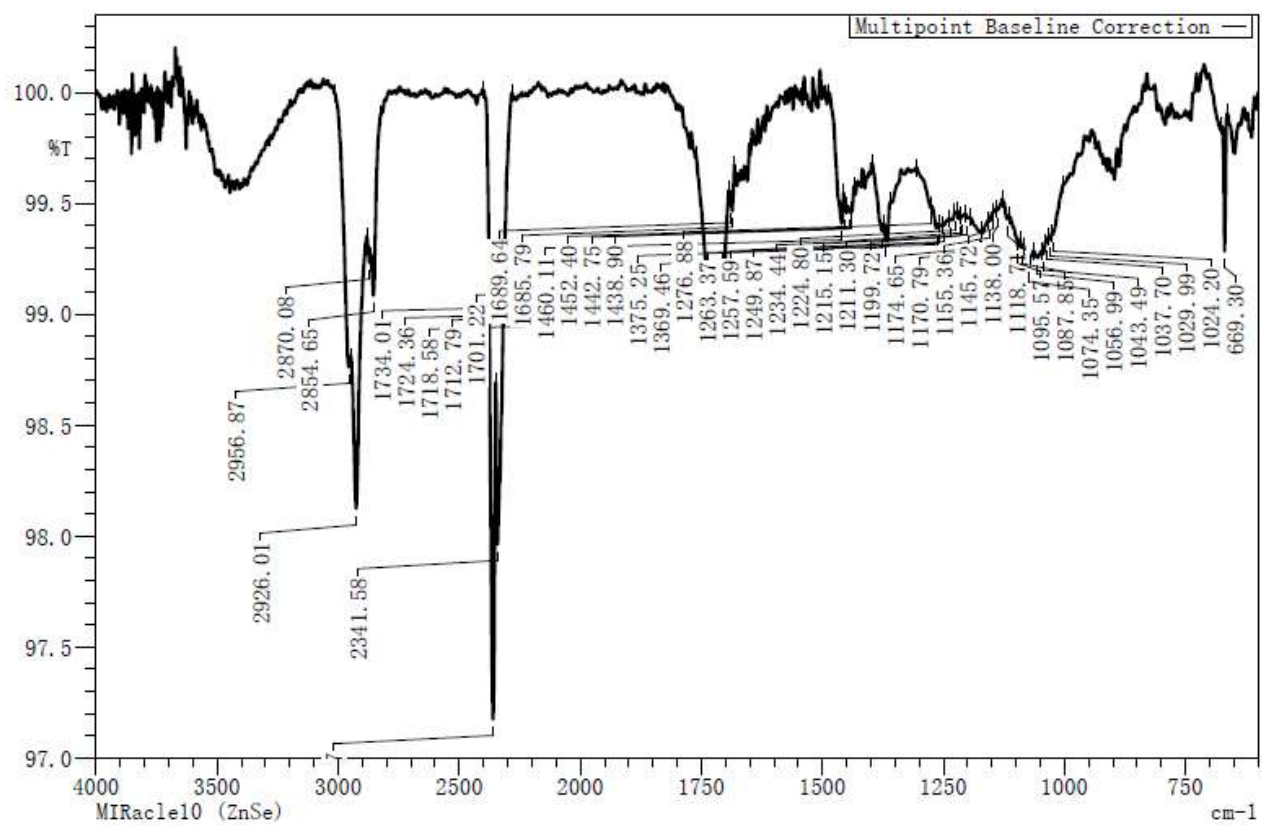

**Figure S9.** The IR spectrum of compound **1**

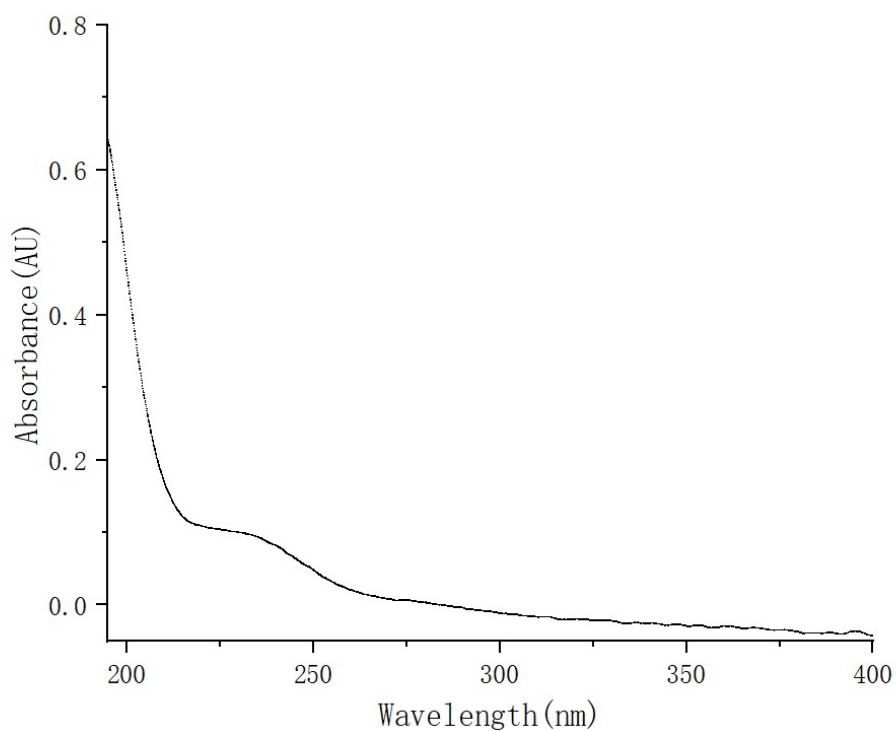

**Figure S10.** The UV spectrum of compound **1**

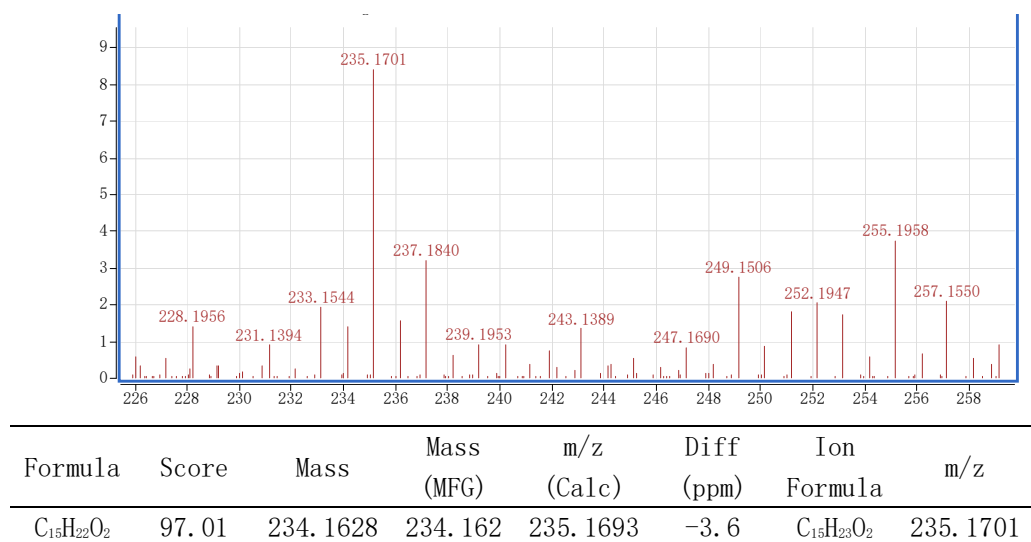

**Figure S11.** The HRESIMS spectrum of compound **2**

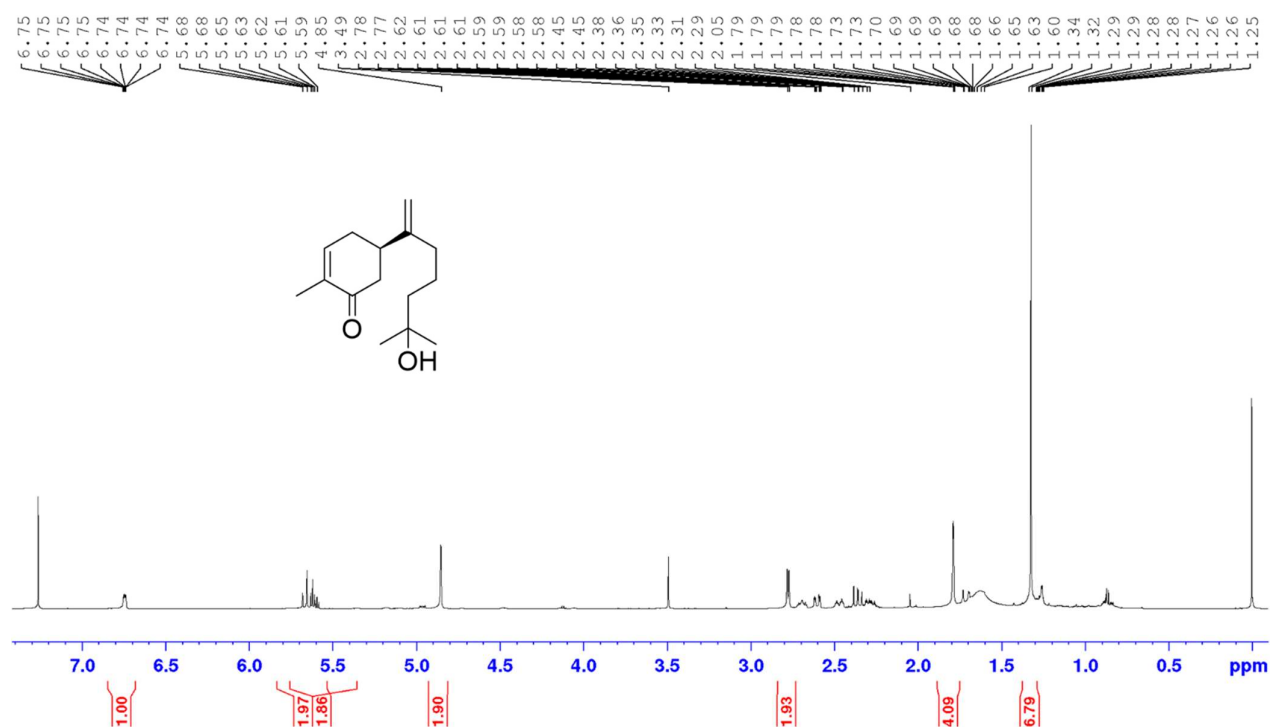

**Figure S12.** The <sup>1</sup>H NMR spectrum of compound **2**

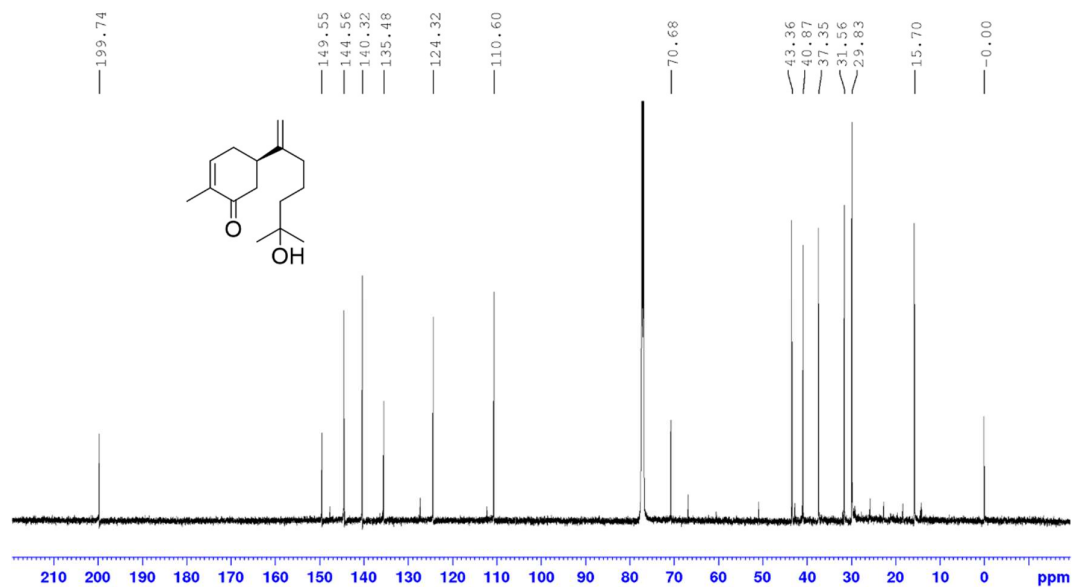

**Figure S13.** The <sup>13</sup>CNMR spectrum of compound 2

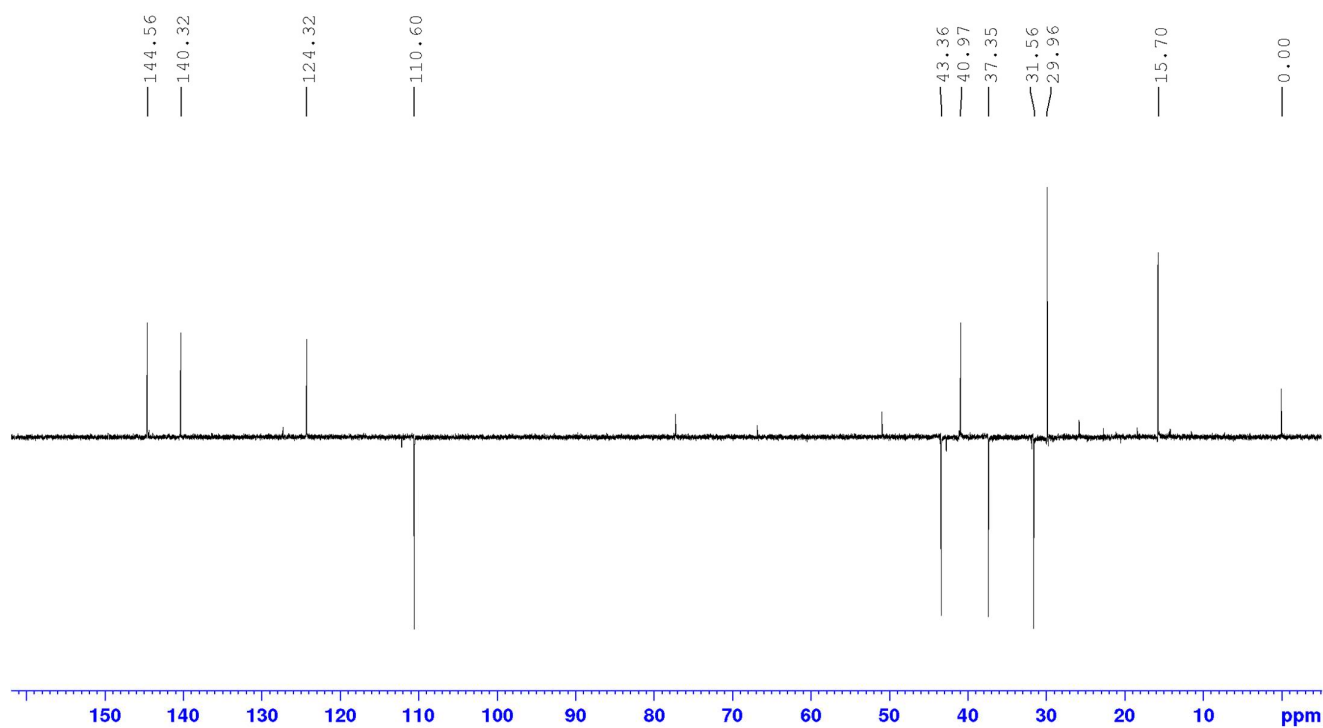

**Figure S14.** The DEPT135 spectrum of compound 2

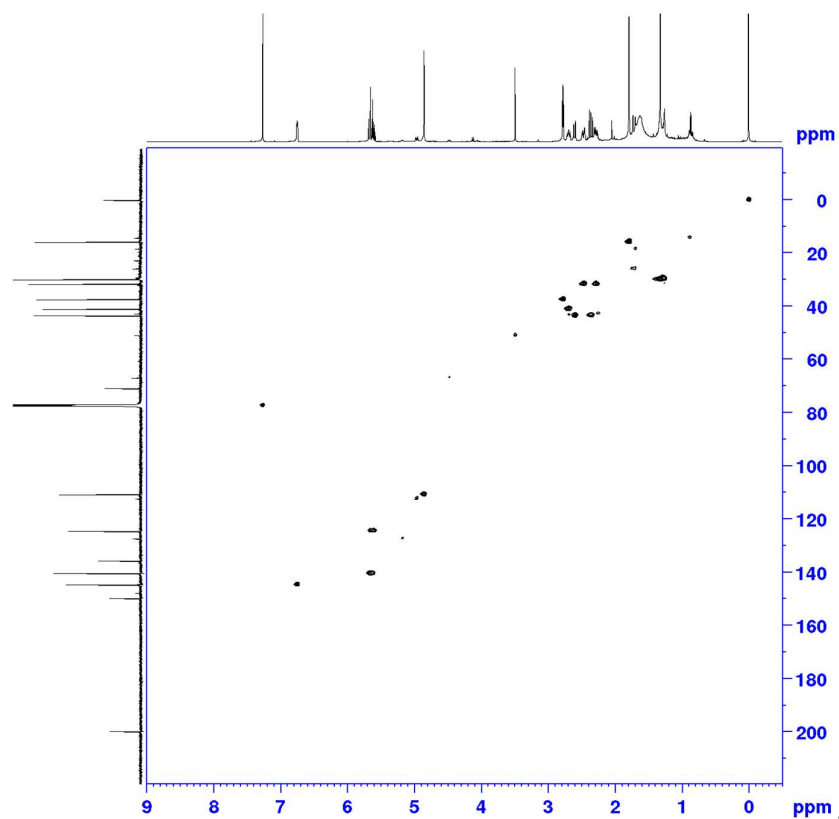

**Figure S15.** The HSQC spectrum of compound **2**

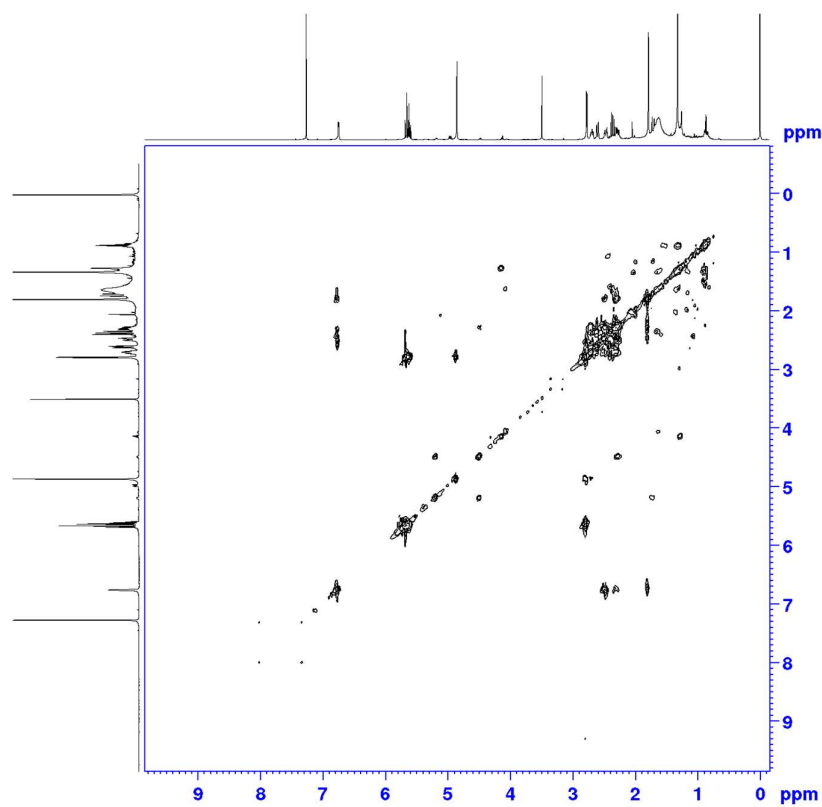

**Figure S16.** The  $^1\text{H}$ - $^1\text{H}$  COSY spectrum of compound **2**



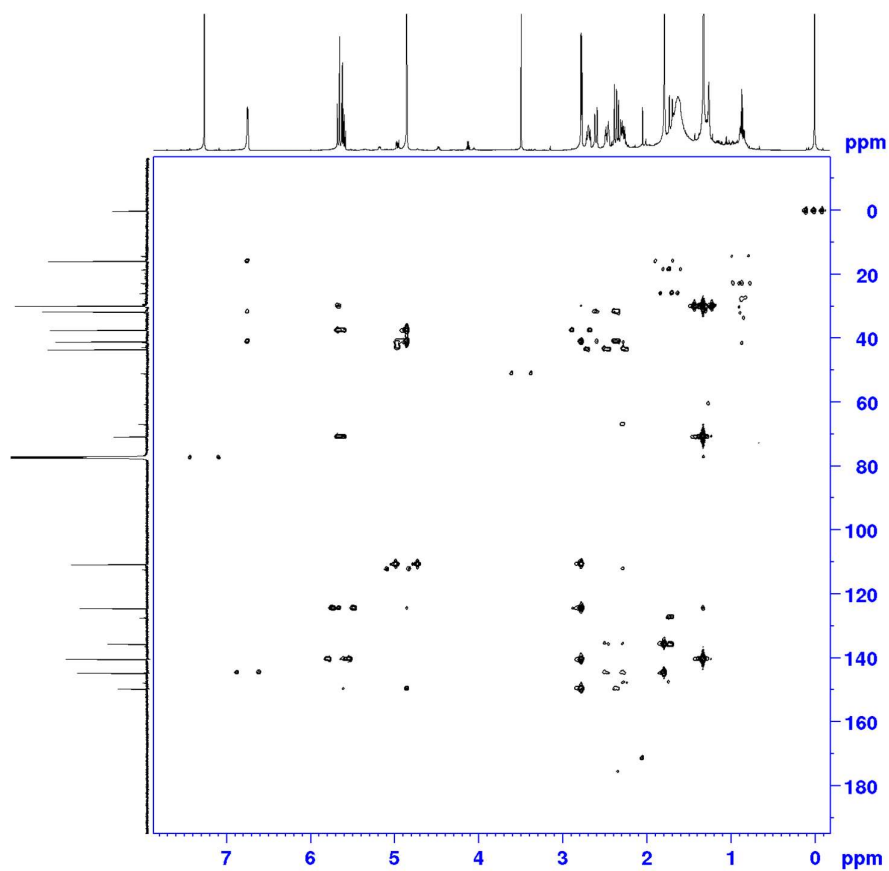

**Figure S17.** The HMBC spectrum of compound 2

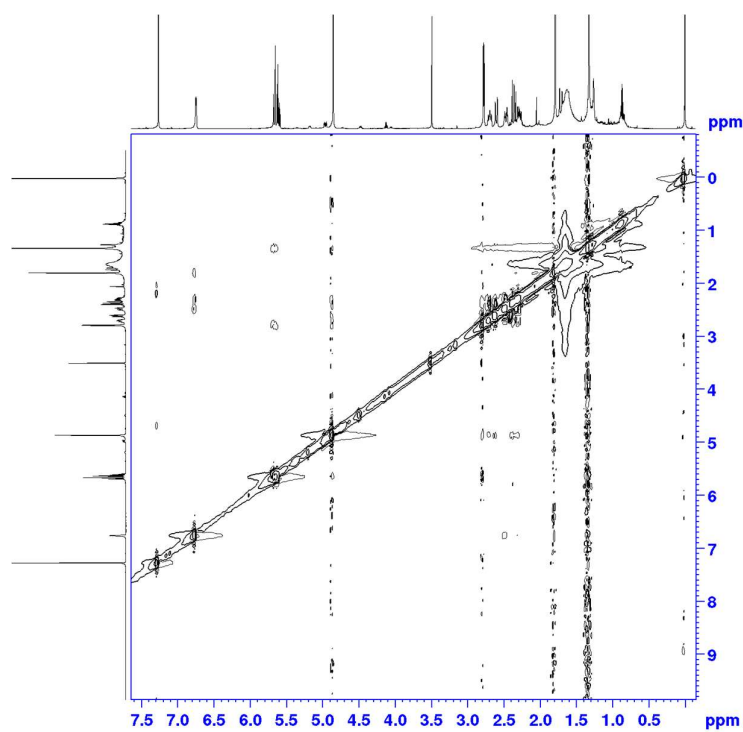

**Figure S18.** The NOESY spectrum of compound 2

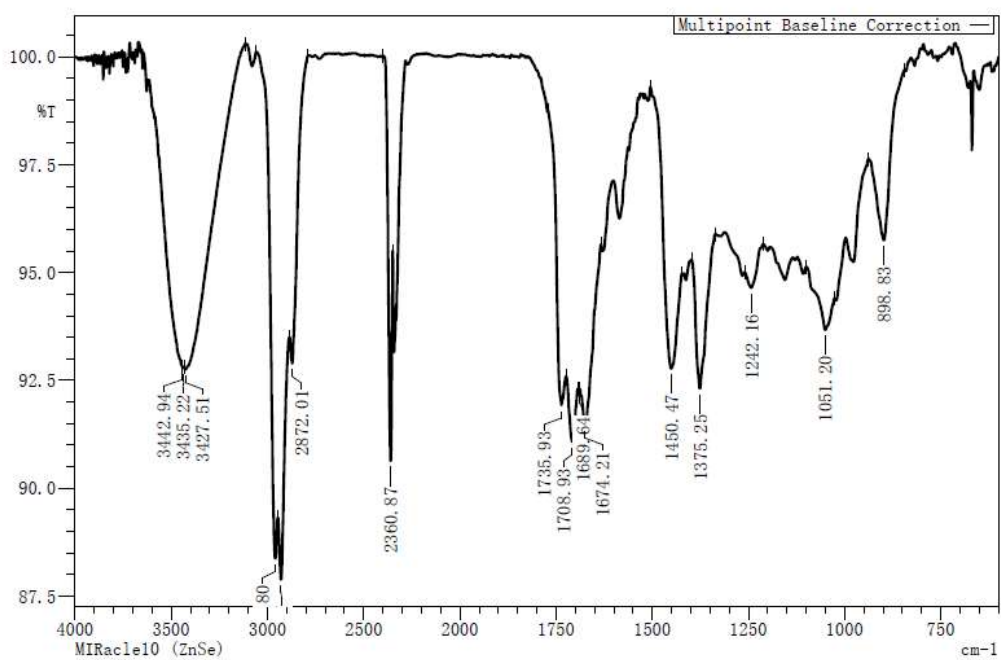

D:\DATA\GYZhu\Xionghaoming\DPK-7445-1.ispd

**Figure S19.** The IR spectrum of compound **2**

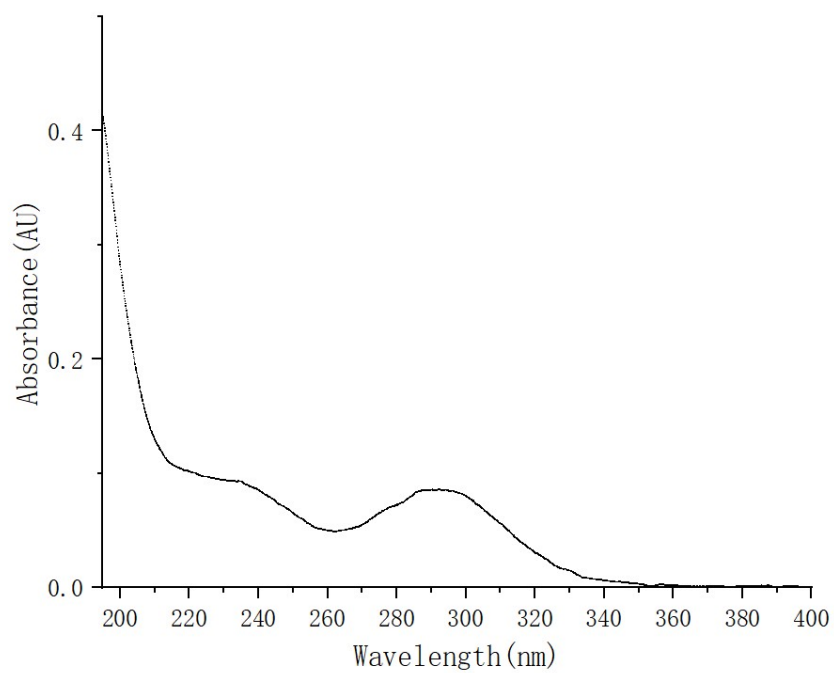

**Figure S20.** The UV spectrum of compound **2**

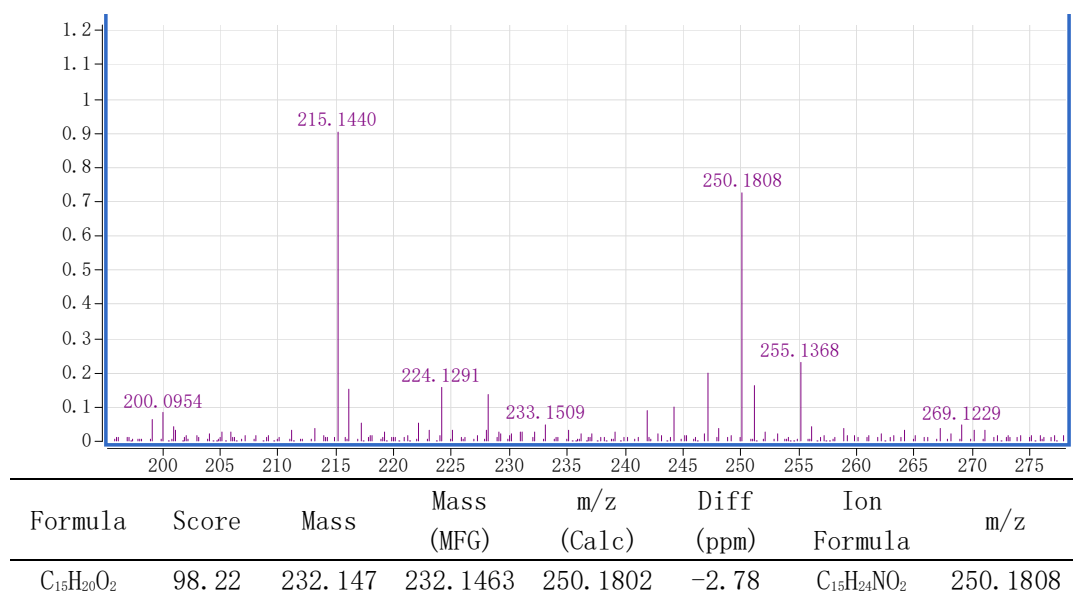

**Figure S21.** The HRESIMS spectrum of compound **3**

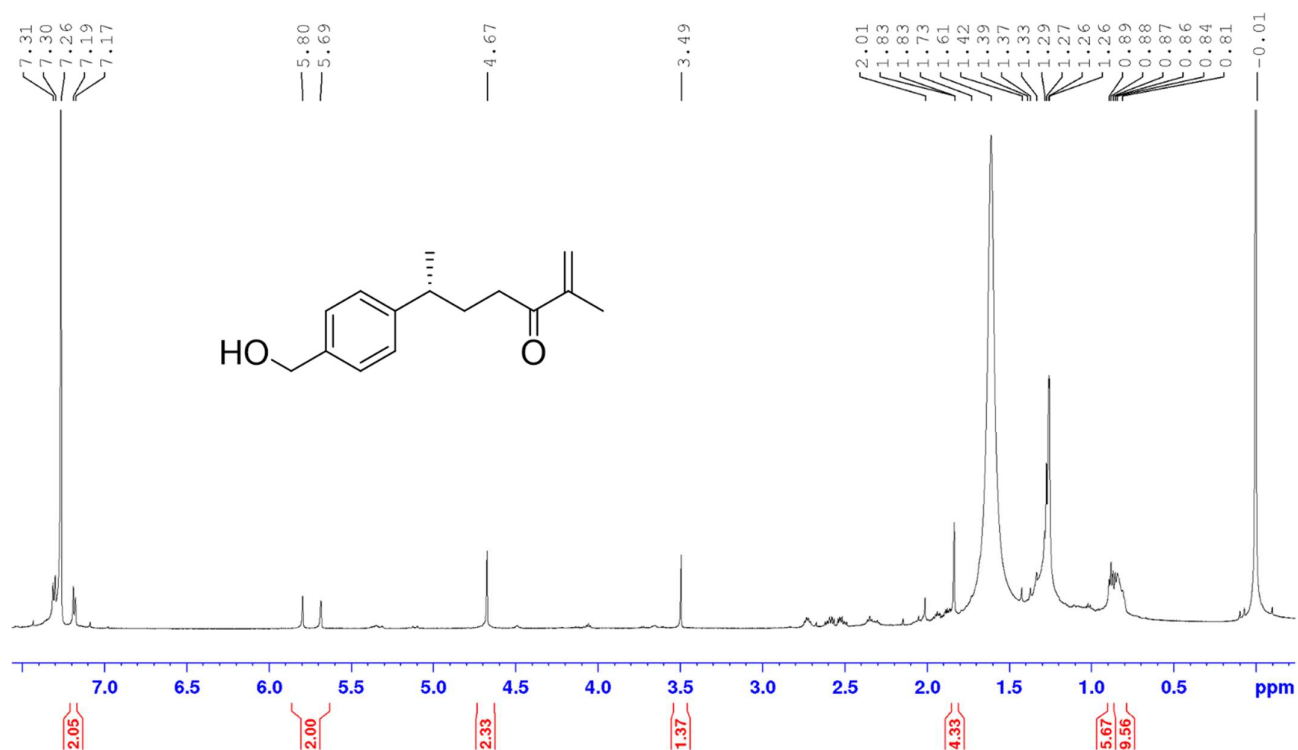

**Figure S22.** The <sup>1</sup>H NMR spectrum of compound **3**

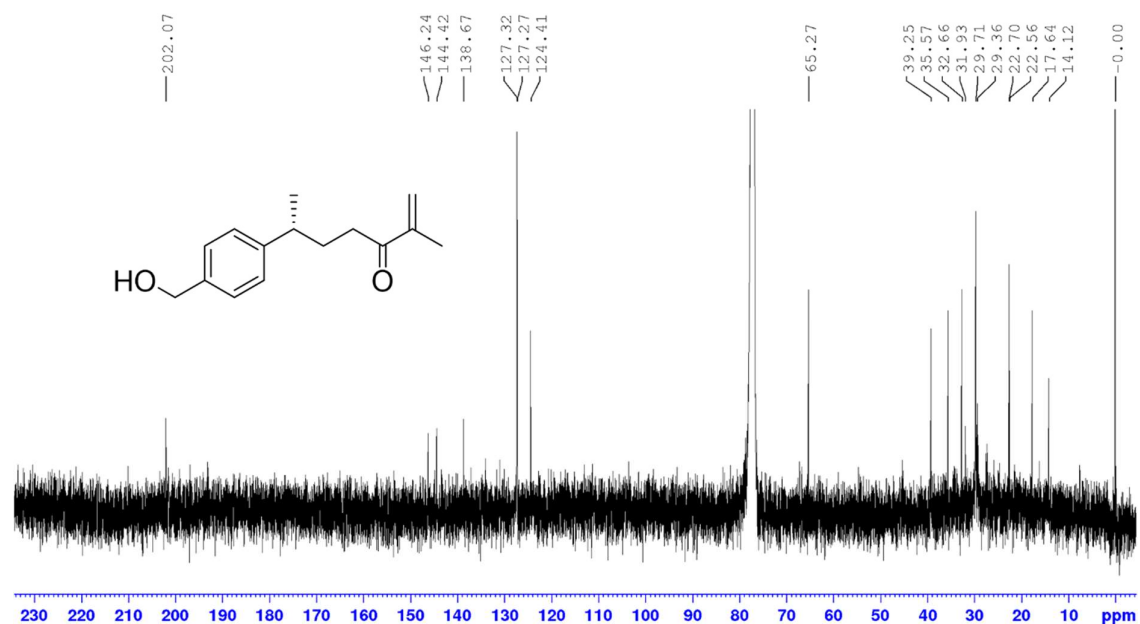

**Figure S23.** The <sup>13</sup>CNMR spectrum of compound **3**

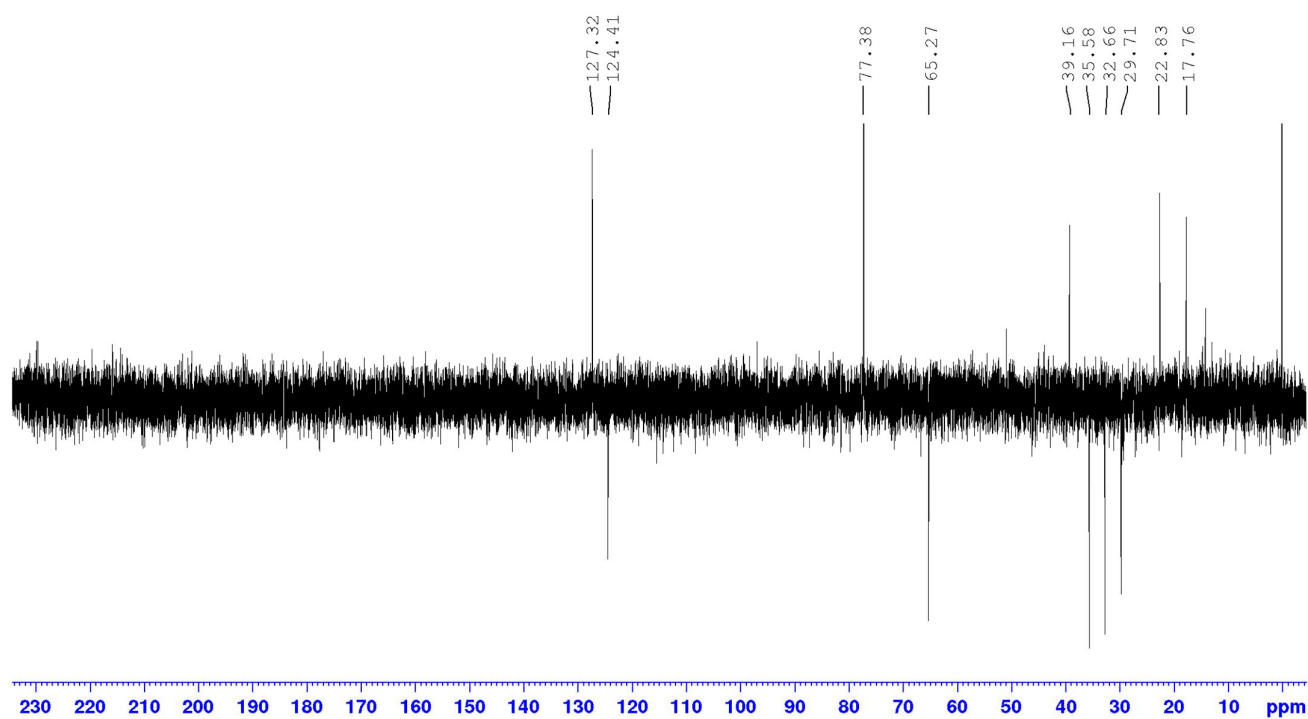

**Figure S24.** The DEPT135 spectrum of compound **3**

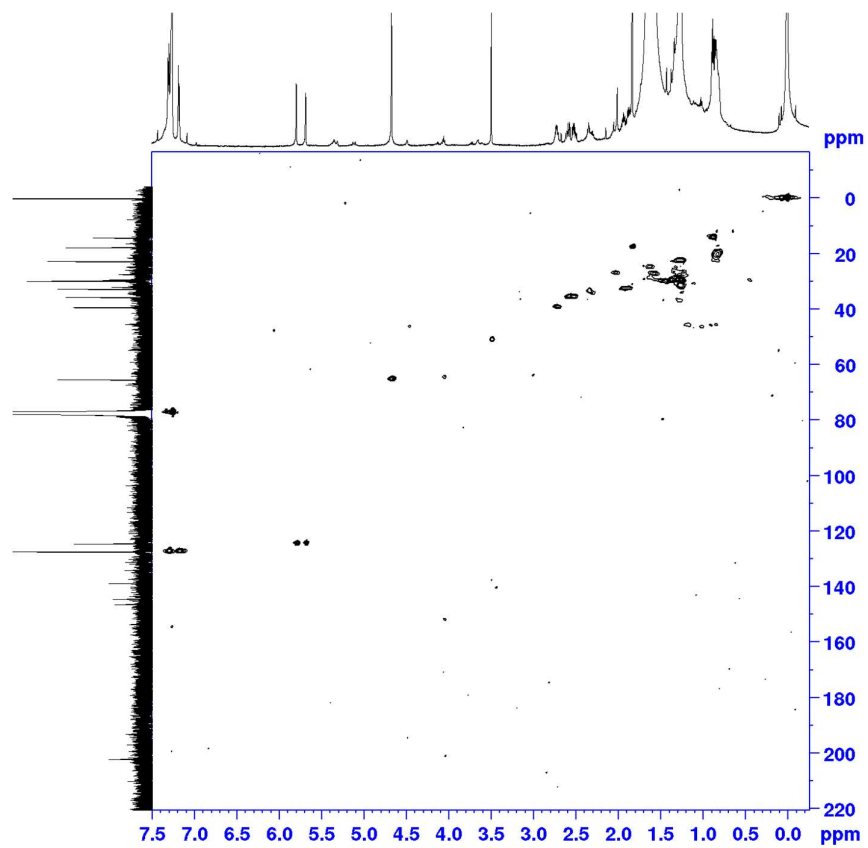

**Figure S25.** The HSQC spectrum of compound **3**

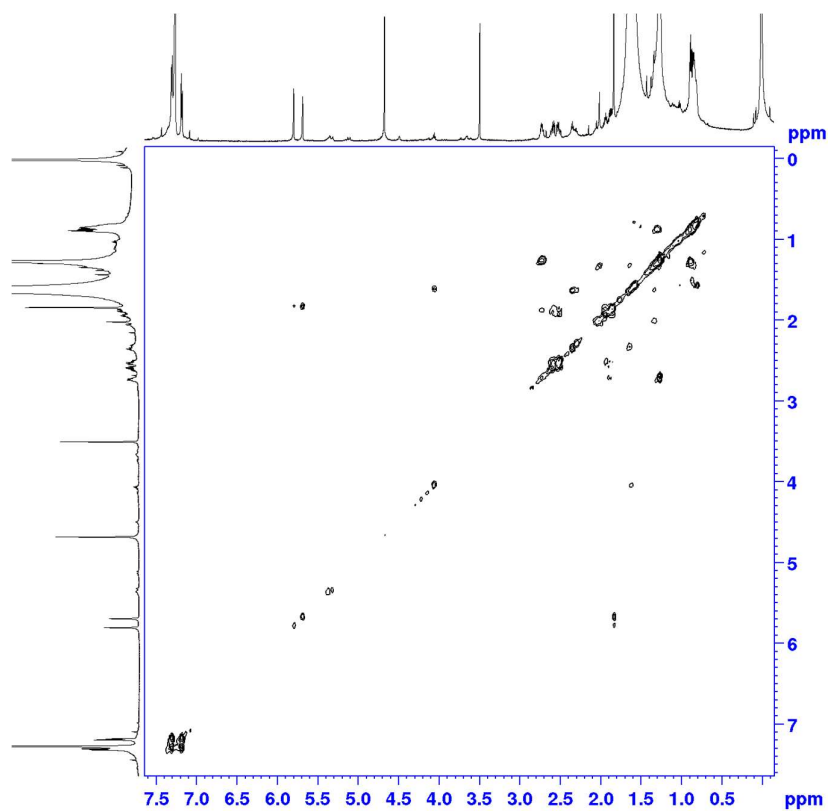

**Figure S26.** The  $^1\text{H}$ - $^1\text{H}$  COSY spectrum of compound **3**

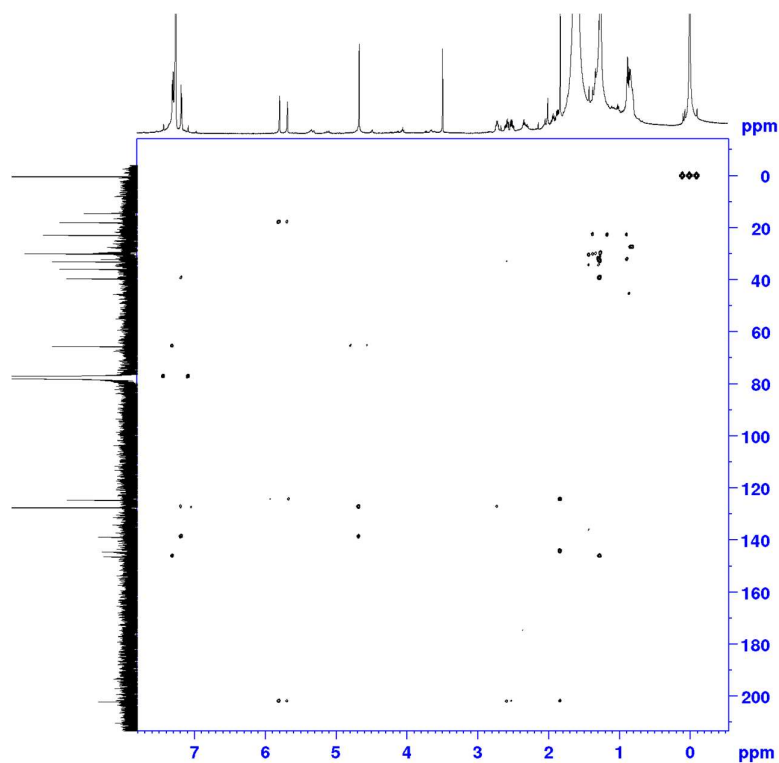

**Figure S27.** The HMBC spectrum of compound **3**

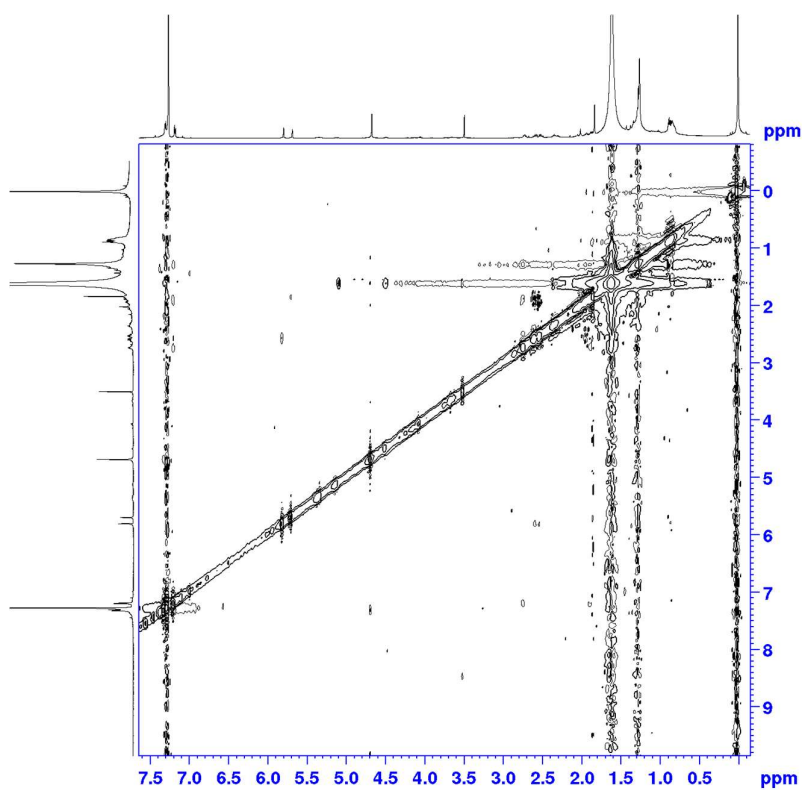

**Figure S28.** The NOESY spectrum of compound **3**

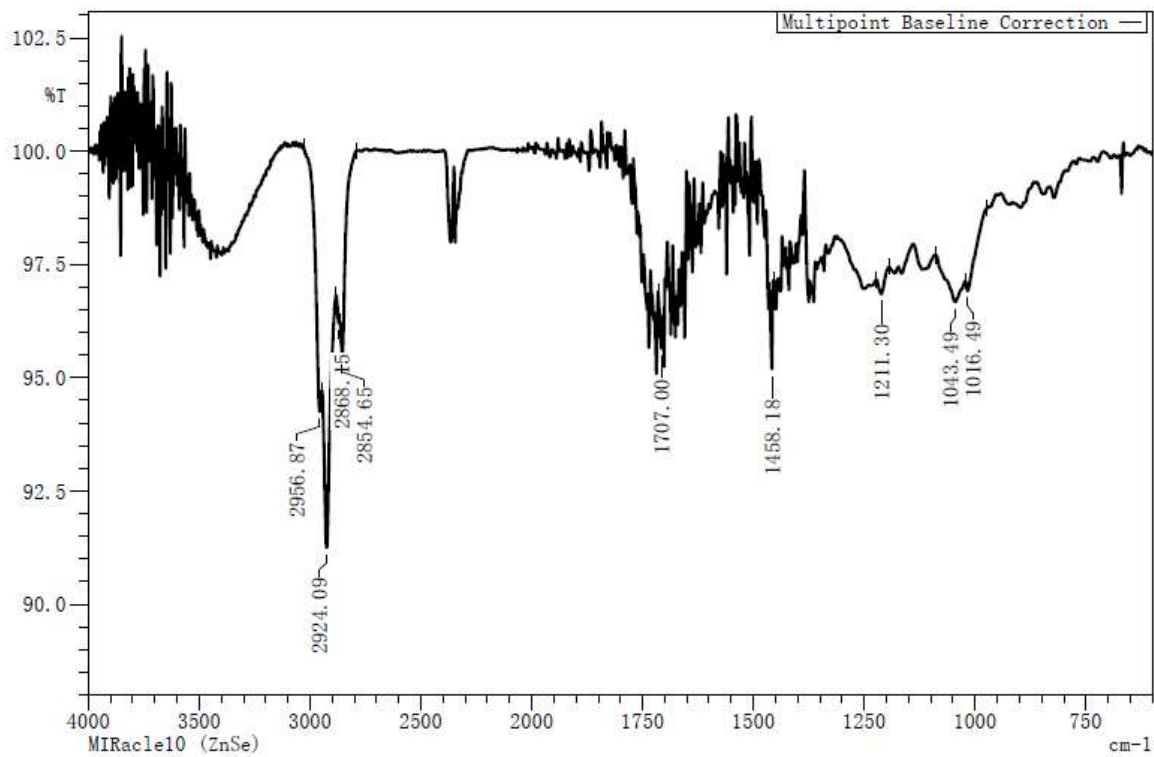

**Figure S29.** The IR spectrum of compound **3**

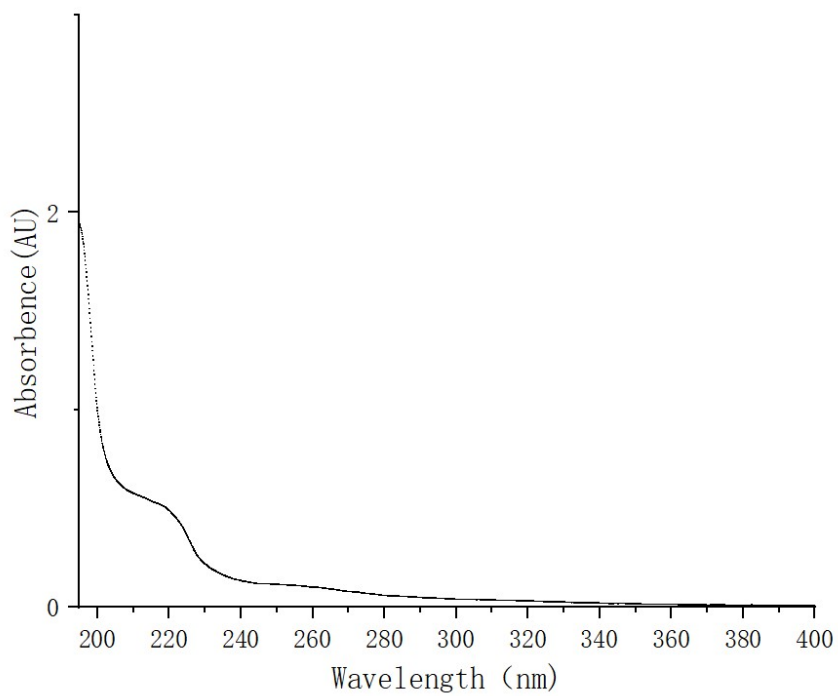

**Figure S30.** The UV spectrum of compound **3**

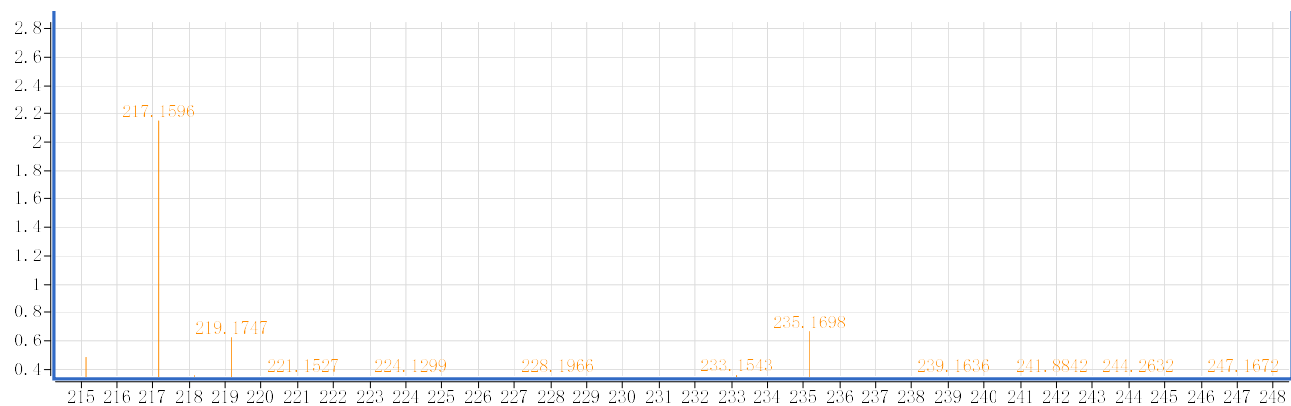

| Formula                                        | Score | Mass     | Mass<br>(MFG) | m/z<br>(Calc) | Diff<br>(ppm) | Ion<br>Formula                                 | m/z      |
|------------------------------------------------|-------|----------|---------------|---------------|---------------|------------------------------------------------|----------|
| C <sub>15</sub> H <sub>22</sub> O <sub>2</sub> | 99.45 | 234.1616 | 234.162       | 235.1693      | 1.52          | C <sub>15</sub> H <sub>23</sub> O <sub>2</sub> | 235.1689 |

**Figure S31.** The HRESIMS spectrum of compound **4**

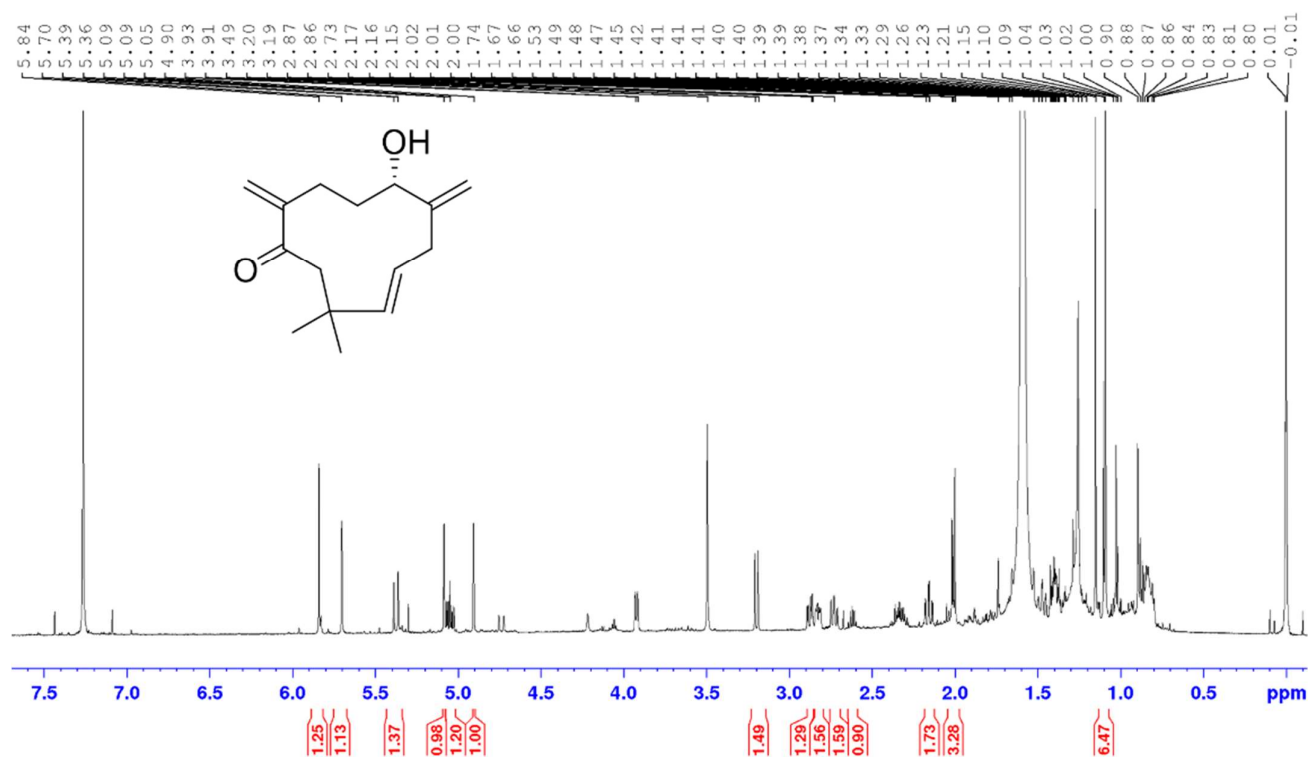

**Figure S32.** The <sup>1</sup>H NMR spectrum of compound **4**



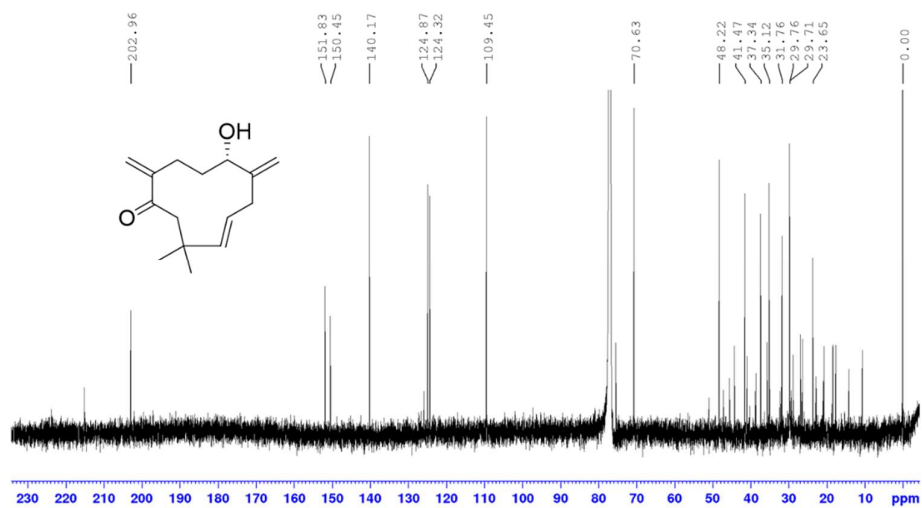

**Figure S33.** The <sup>13</sup>CNMR spectrum of compound **4**

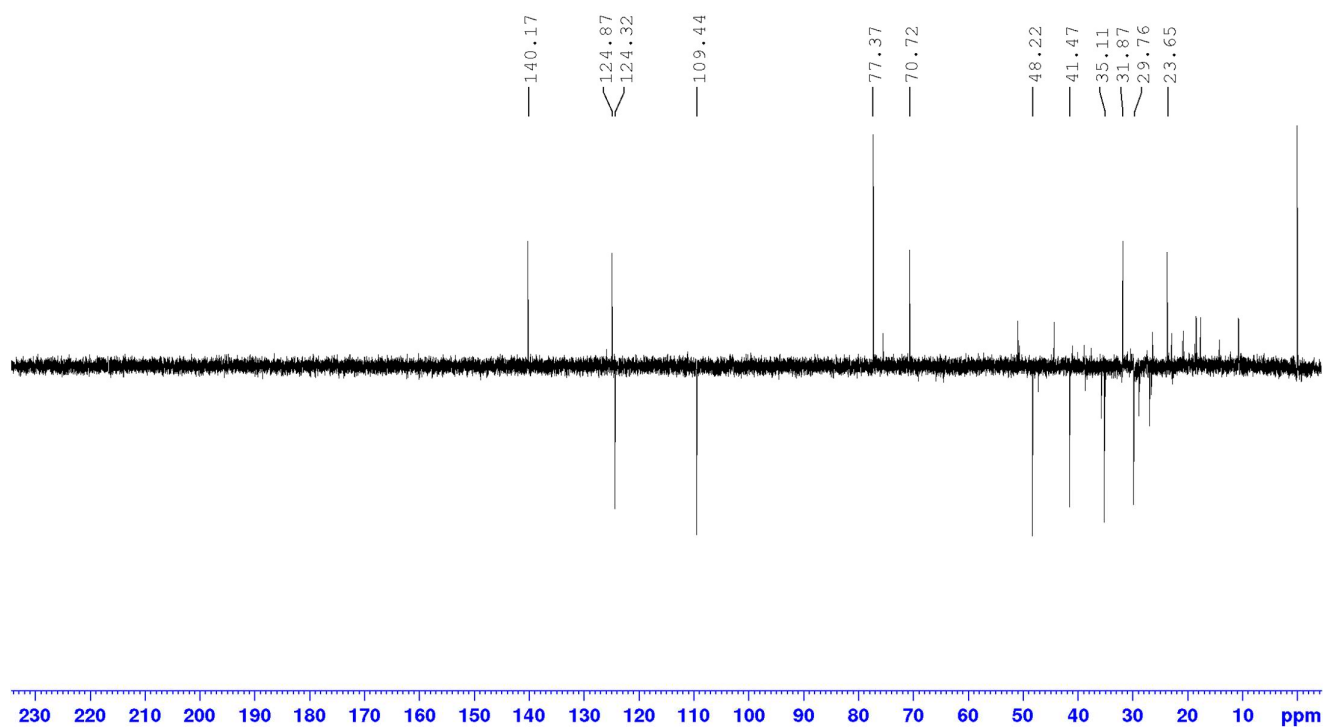

**Figure S34.** The DEPT135 spectrum of compound **4**

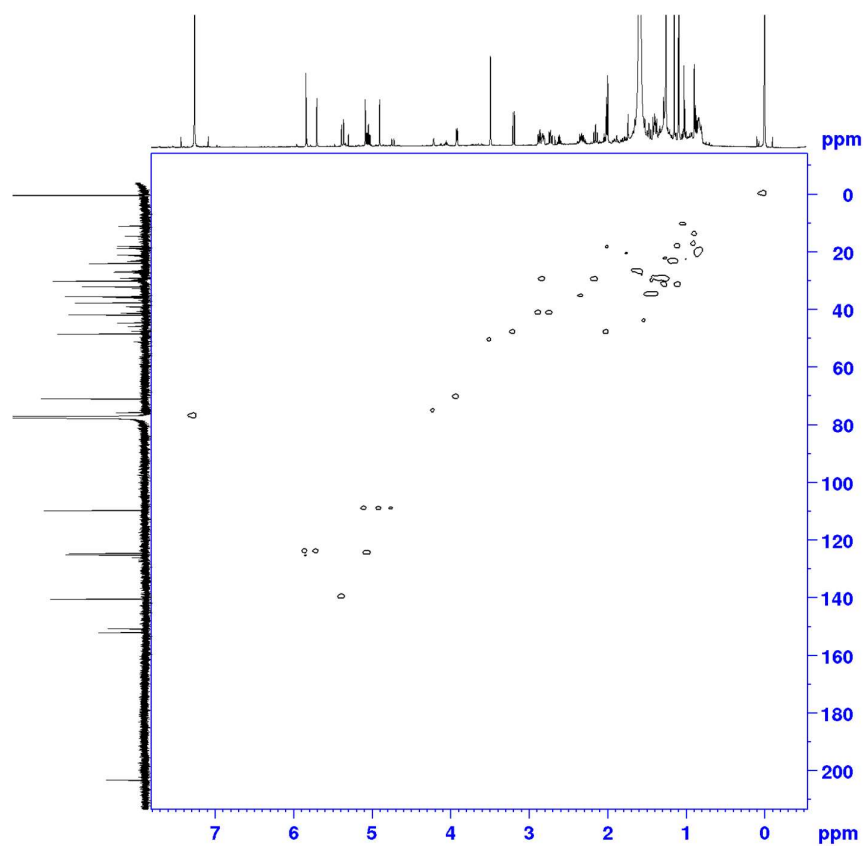

**Figure S35.** The HSQC spectrum of compound **4**

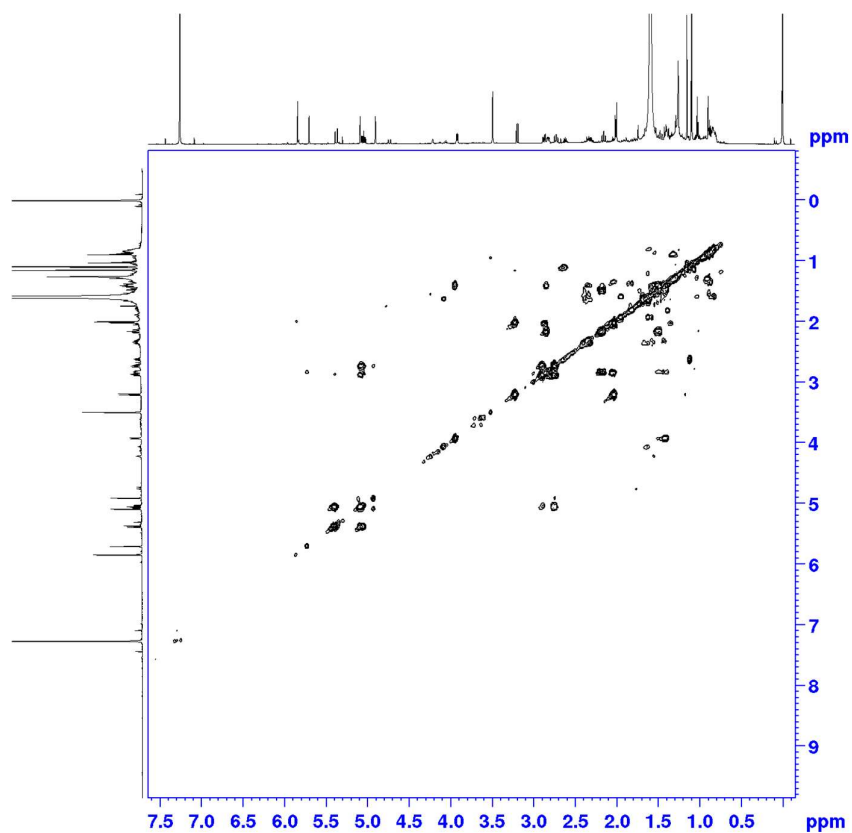

**Figure S36.** The  $^1\text{H}$ - $^1\text{H}$  COSY spectrum of compound **4**

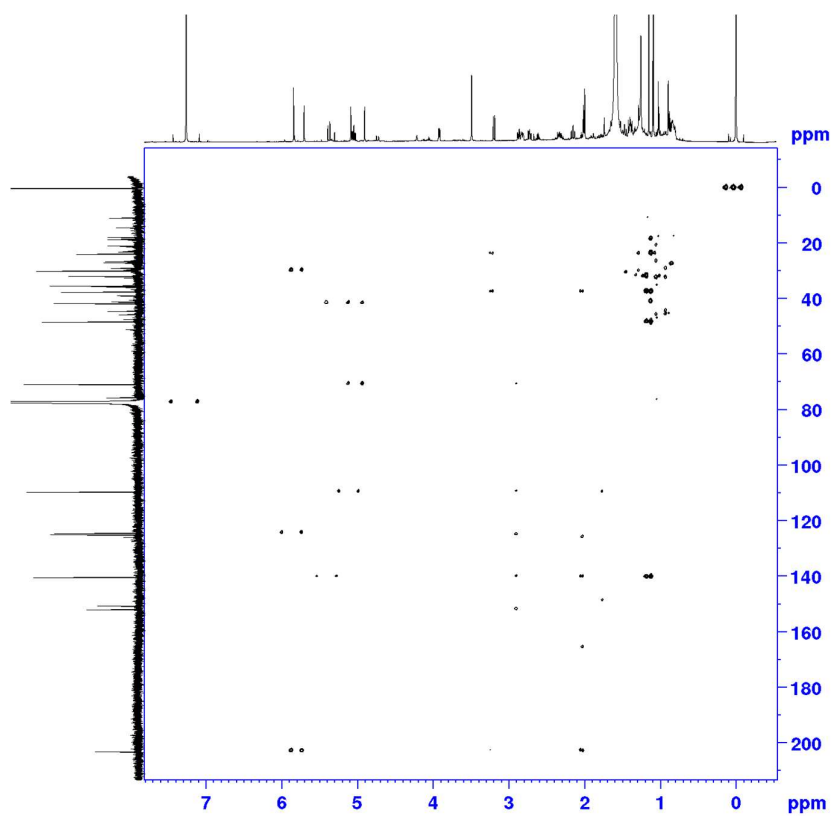

**Figure S37.** The HMBC spectrum of compound **4**

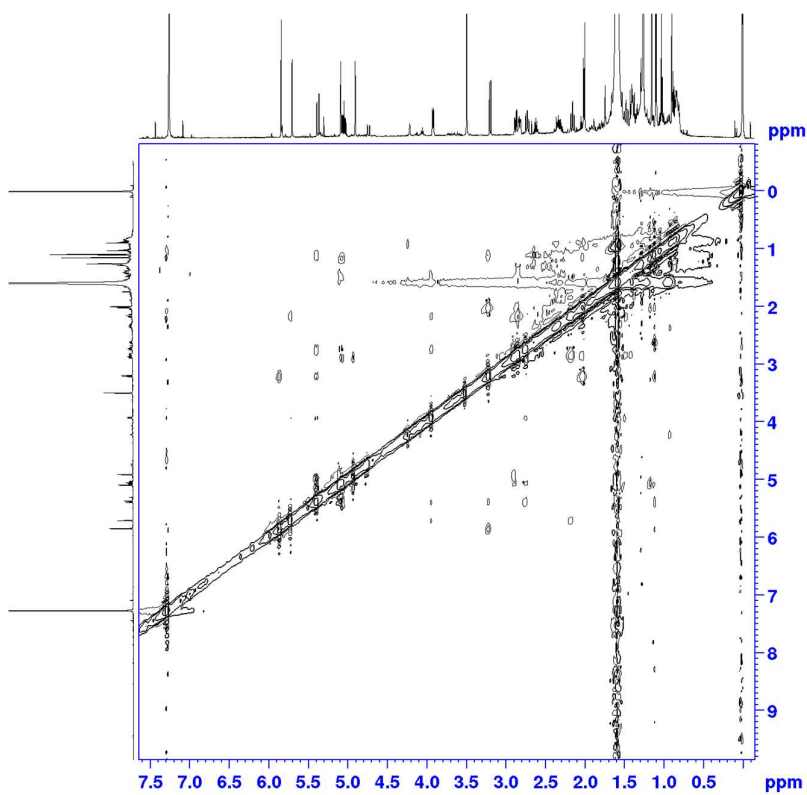

**Figure S38.** The NOESY spectrum of compound **4**

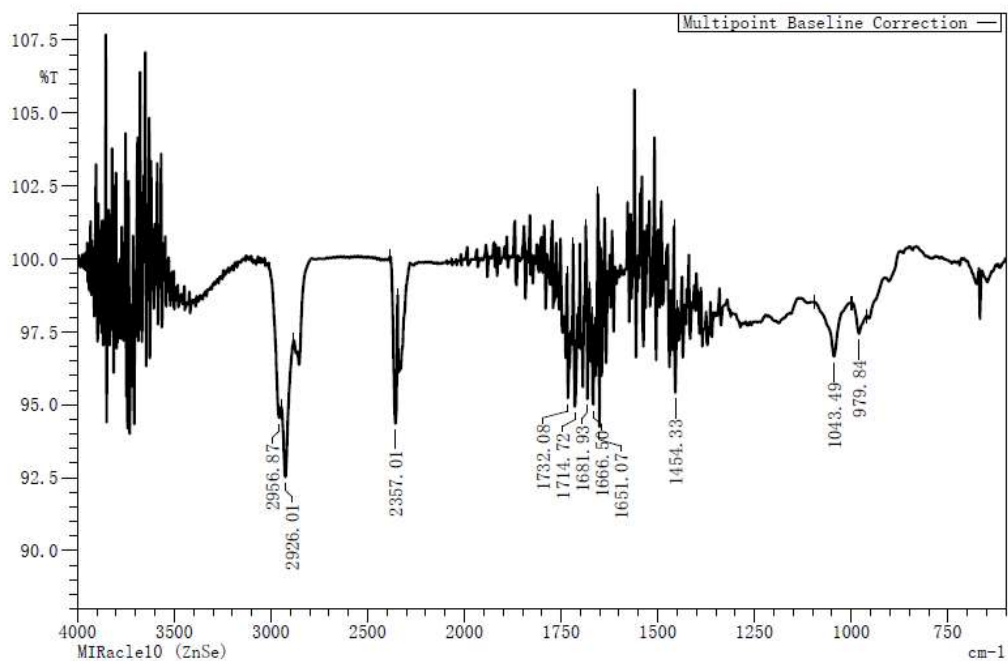

**Figure S39.** The IR spectrum of compound **4**

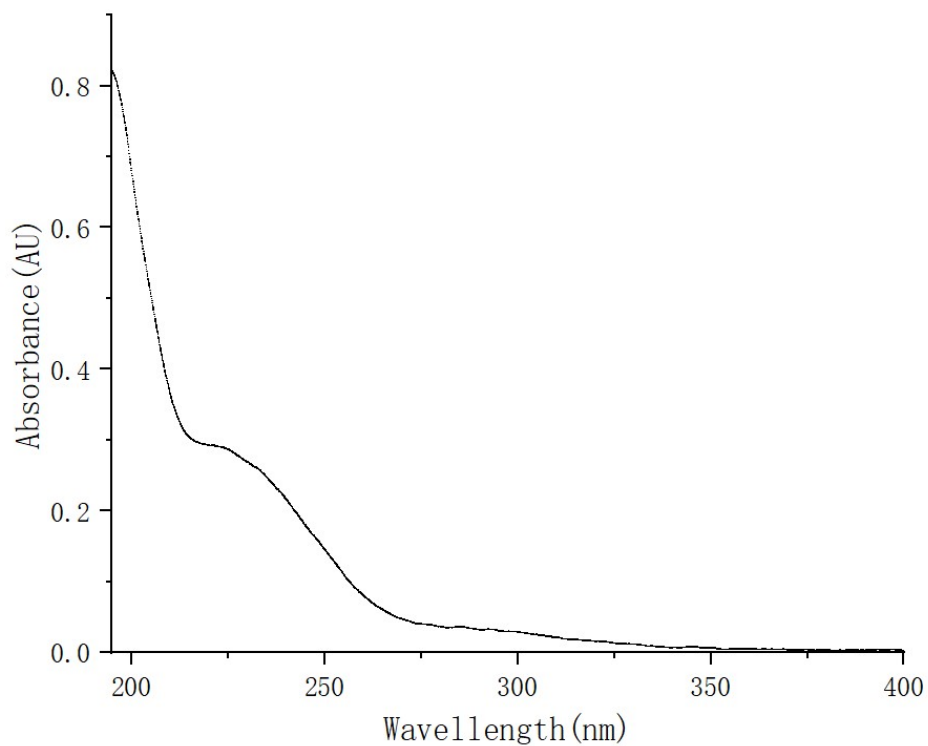

**Figure S40.** The UV spectrum of compound **4**

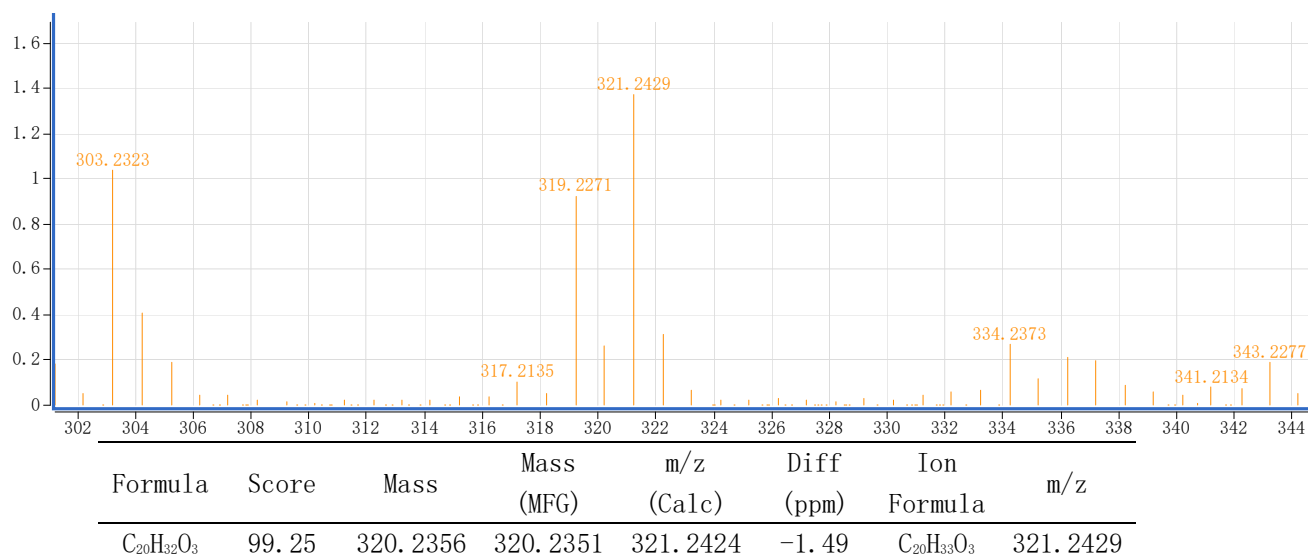

**Figure S41.** The HRESIMS spectrum of compound **5**

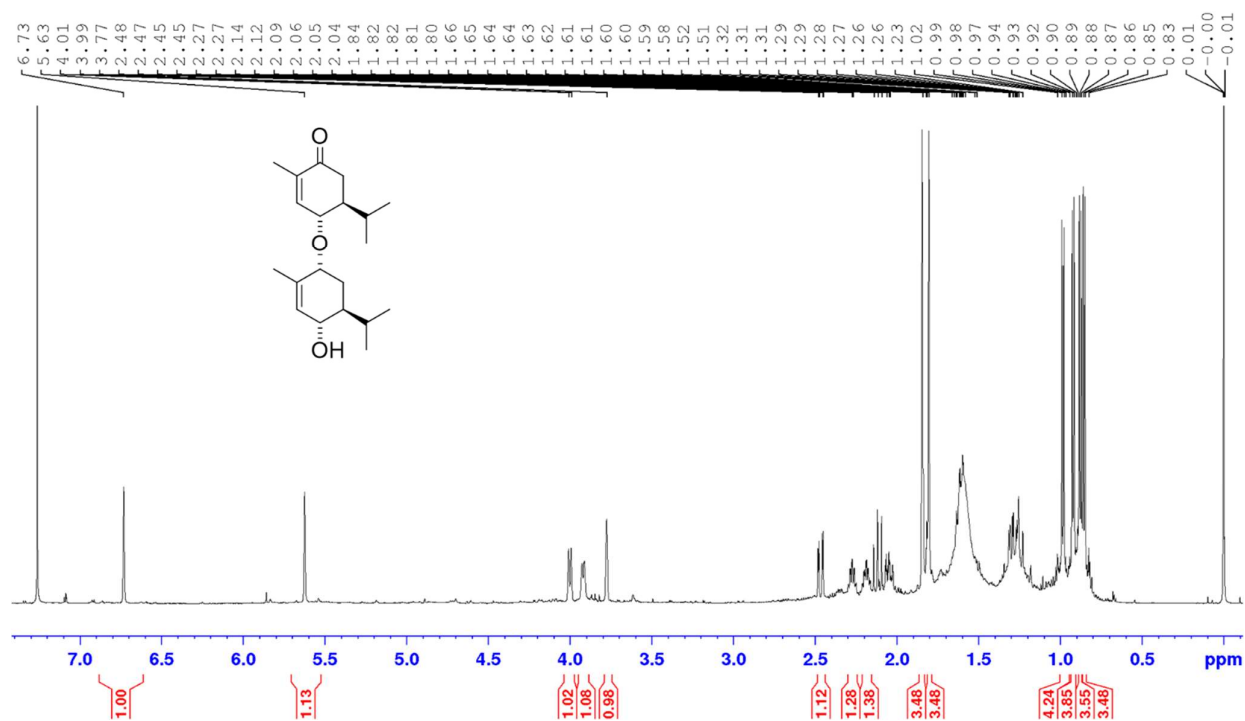

**Figure S42.** The <sup>1</sup>H NMR spectrum of compound **5**

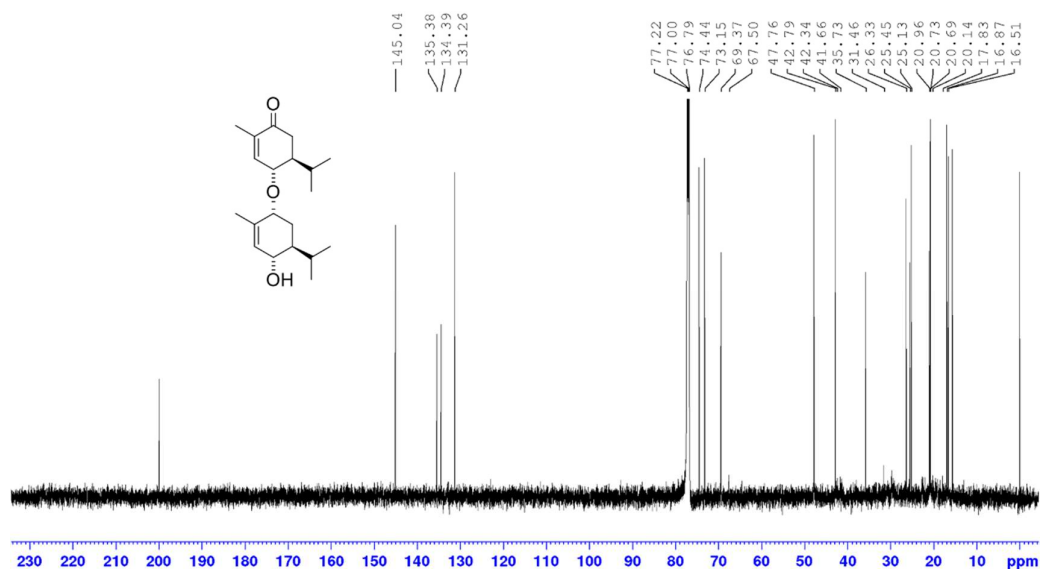

**Figure S43.** The <sup>13</sup>CNMR spectrum of compound **5**

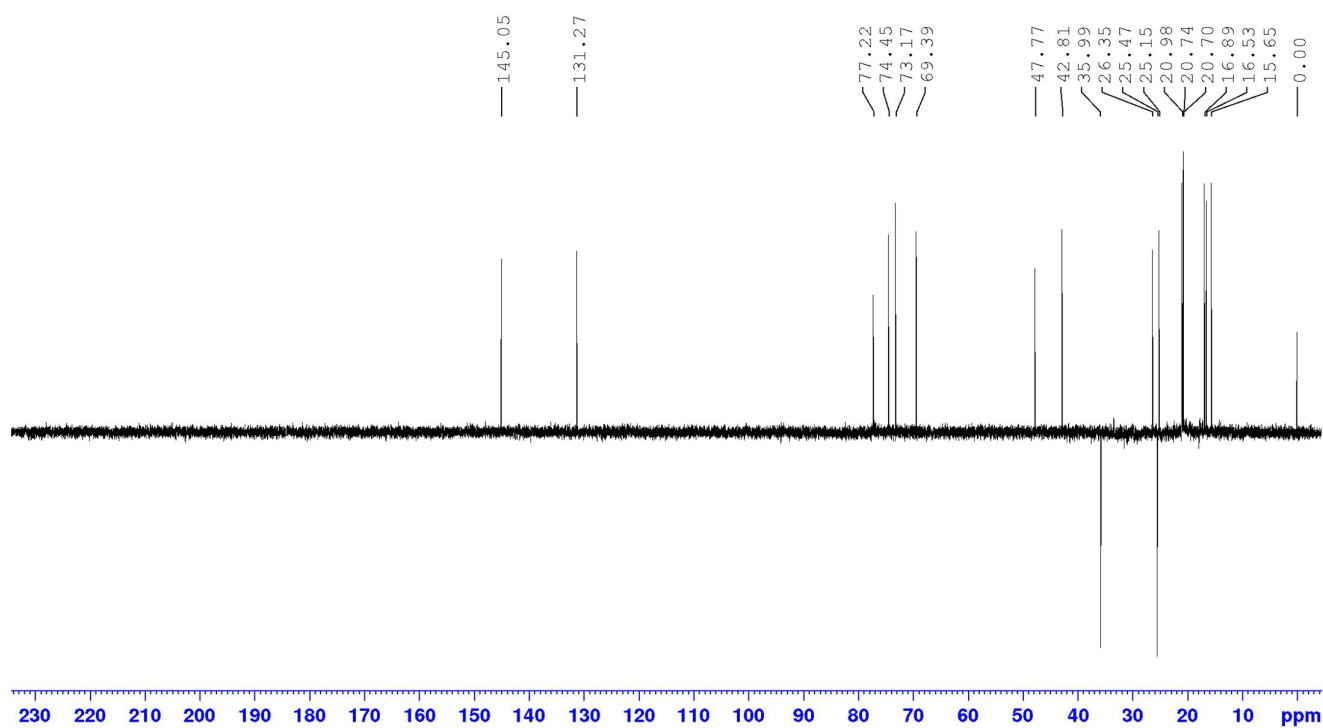

**Figure S44.** The DEPT135 spectrum of compound **5**

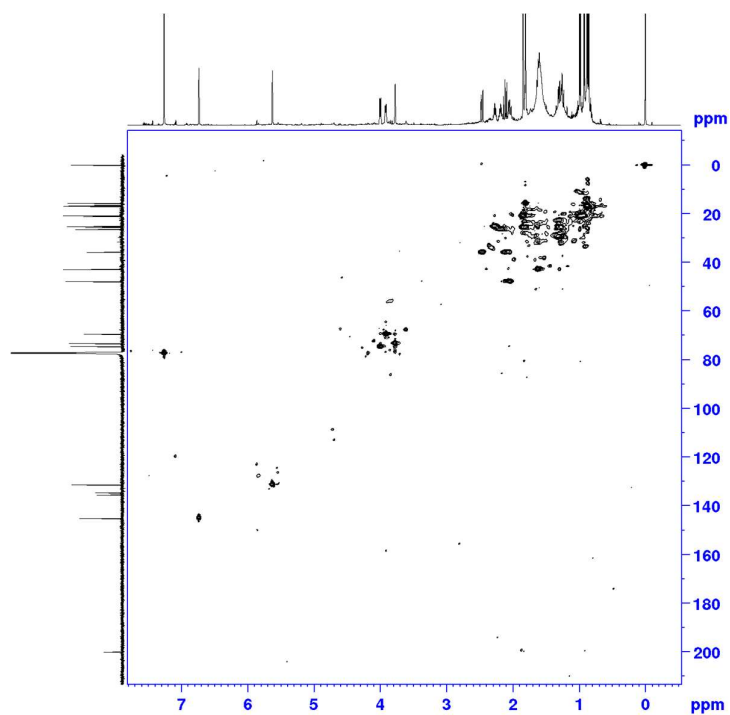

**Figure S45.** The HSQC spectrum of compound **5**

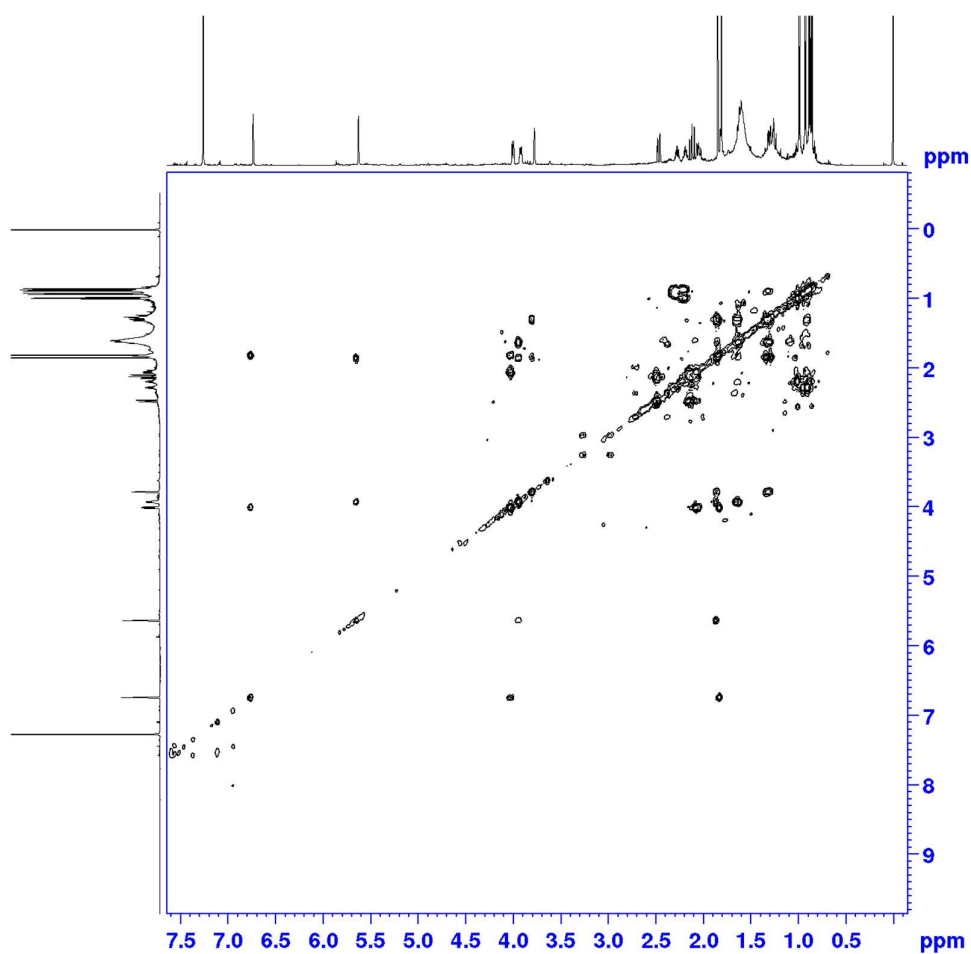

**Figure S46.** The  $^1\text{H}$ - $^1\text{H}$  COSY spectrum of compound **5**

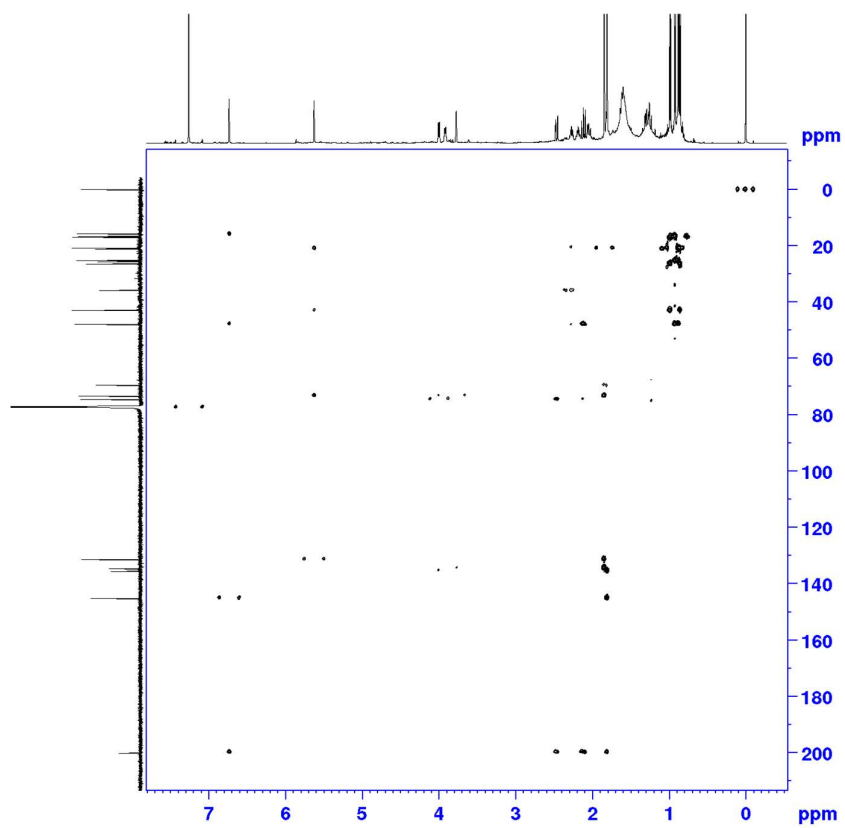

**Figure S47.** The HMBC spectrum of compound **5**

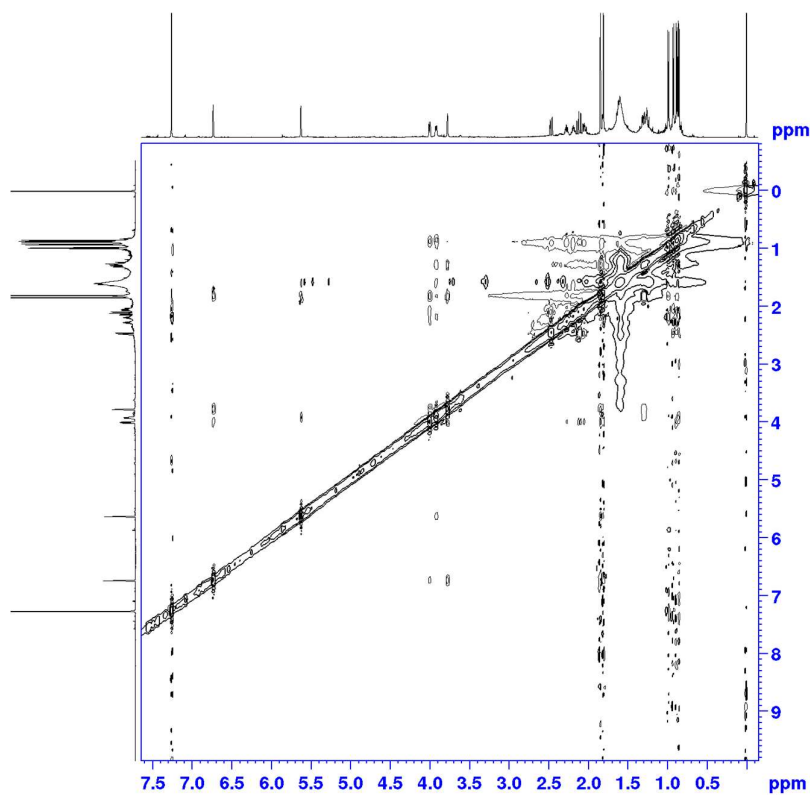

**Figure S48.** The NOESY spectrum of compound **5**



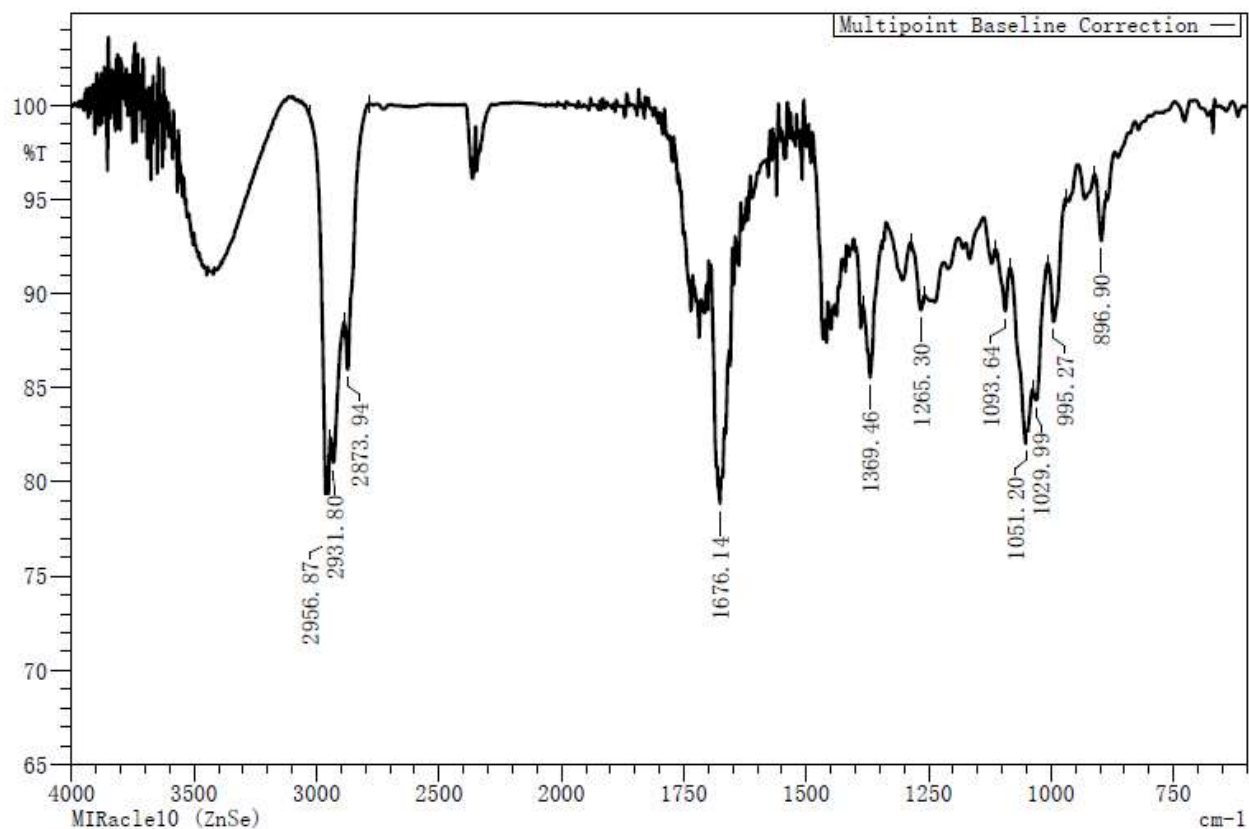

**Figure S49.** The IR spectrum of compound 5

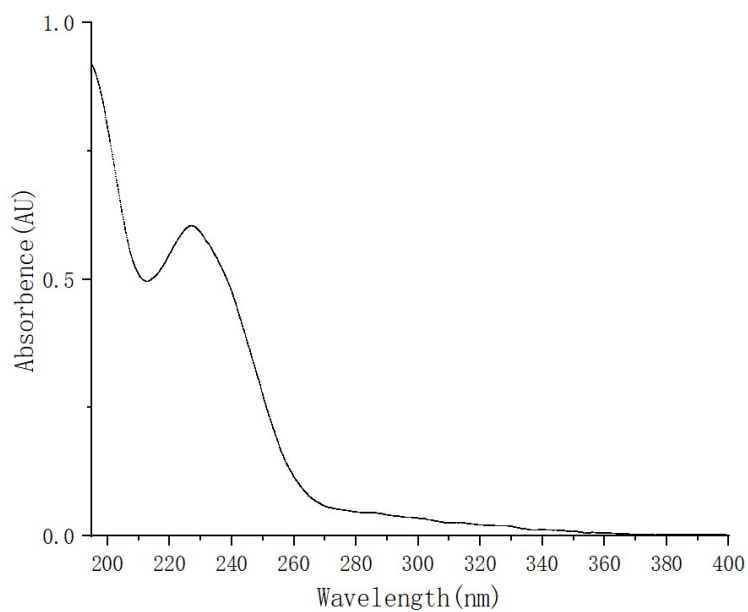

**Figure S50.** The IR spectrum of compound 5

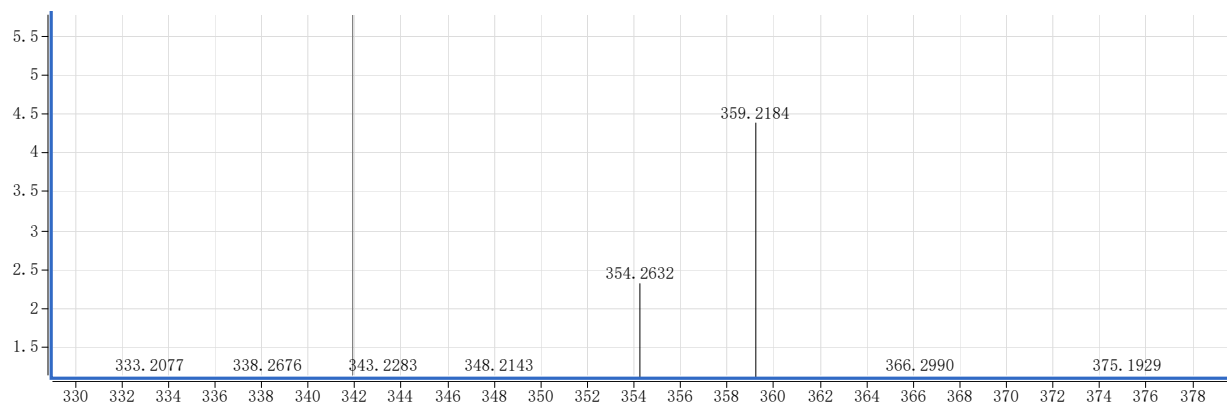

| Formula                                        | Score | Mass     | Mass<br>(MFG) | m/z<br>(Calc) | Diff<br>(ppm) | Ion<br>Formula                                   | m/z      |
|------------------------------------------------|-------|----------|---------------|---------------|---------------|--------------------------------------------------|----------|
| C <sub>20</sub> H <sub>32</sub> O <sub>4</sub> | 97.61 | 336.2292 | 336.2301      | 359.2193      | -1.49         | C <sub>20</sub> H <sub>33</sub> NaO <sub>3</sub> | 359.2184 |

**Figure S51.** The HRESIMS spectrum of compound **6**

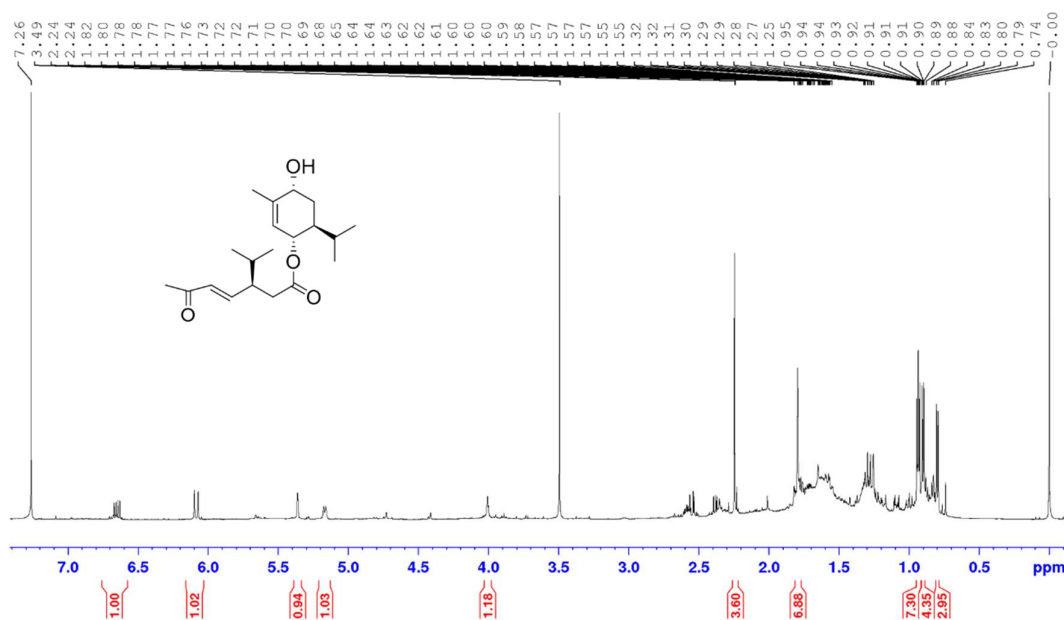

**Figure S52.** The <sup>1</sup>H NMR spectrum of compound **6**

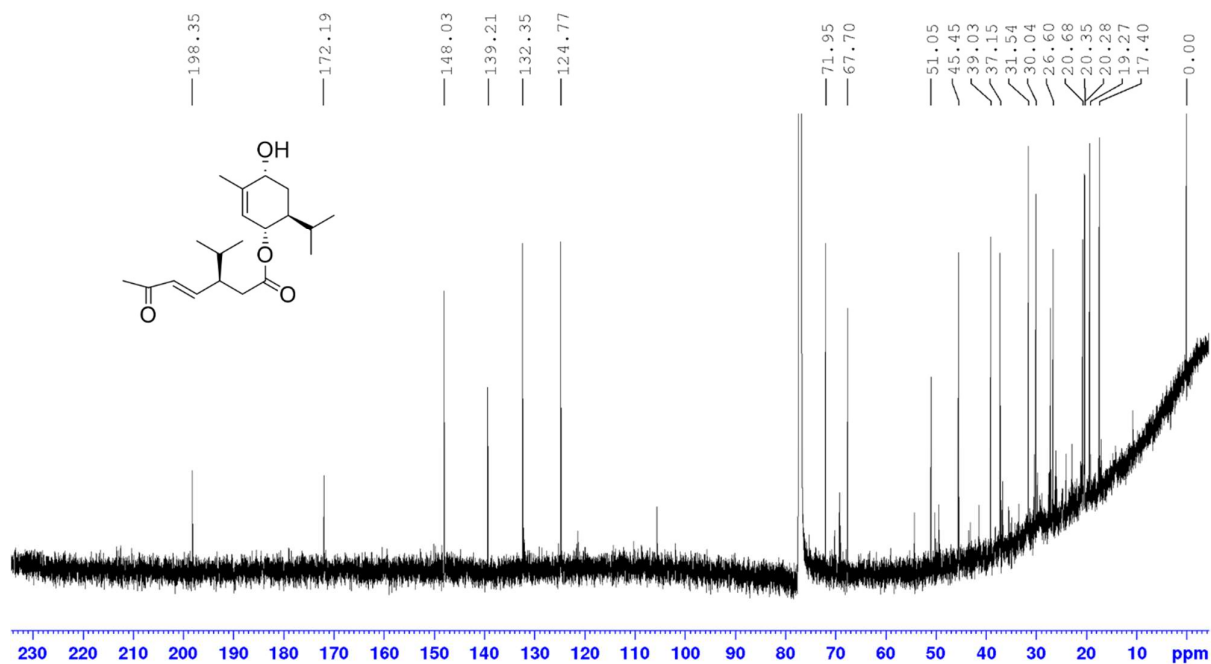

**Figure S53.** The <sup>13</sup>CNMR spectrum of compound **6**

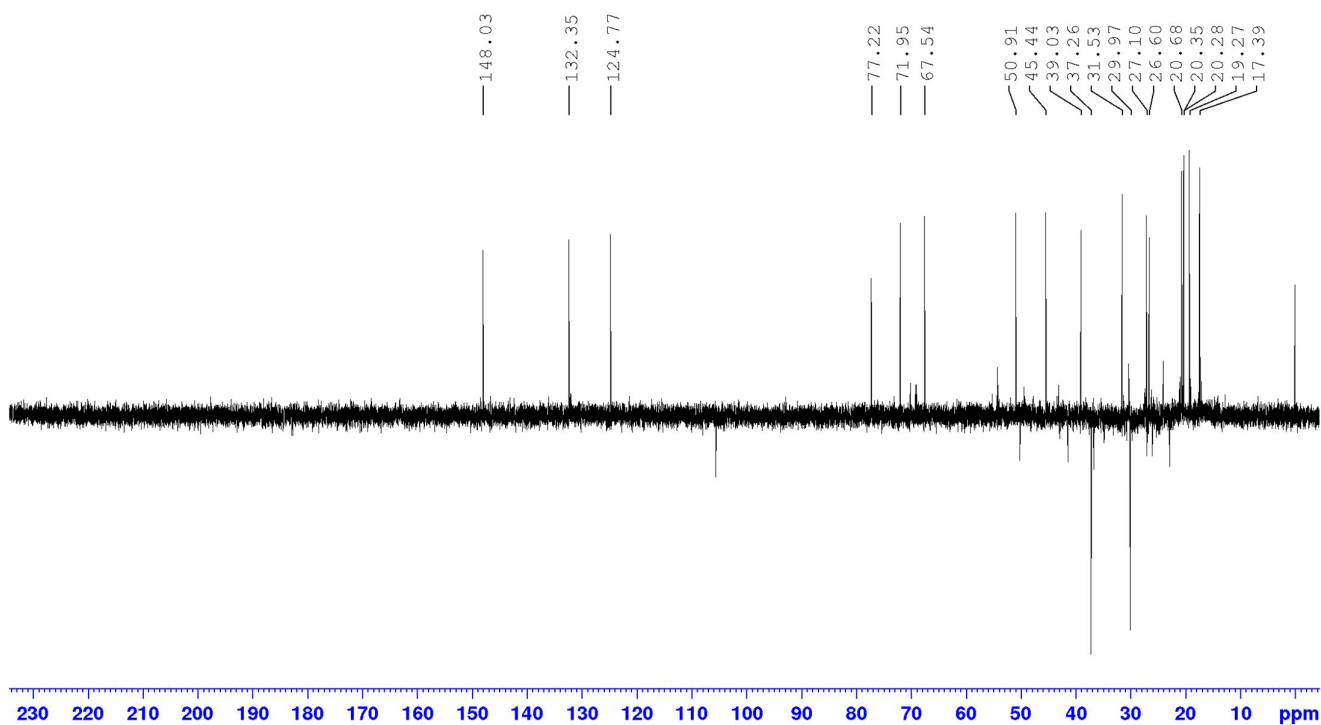

**Figure S54.** The DEPT135 spectrum of compound **6**

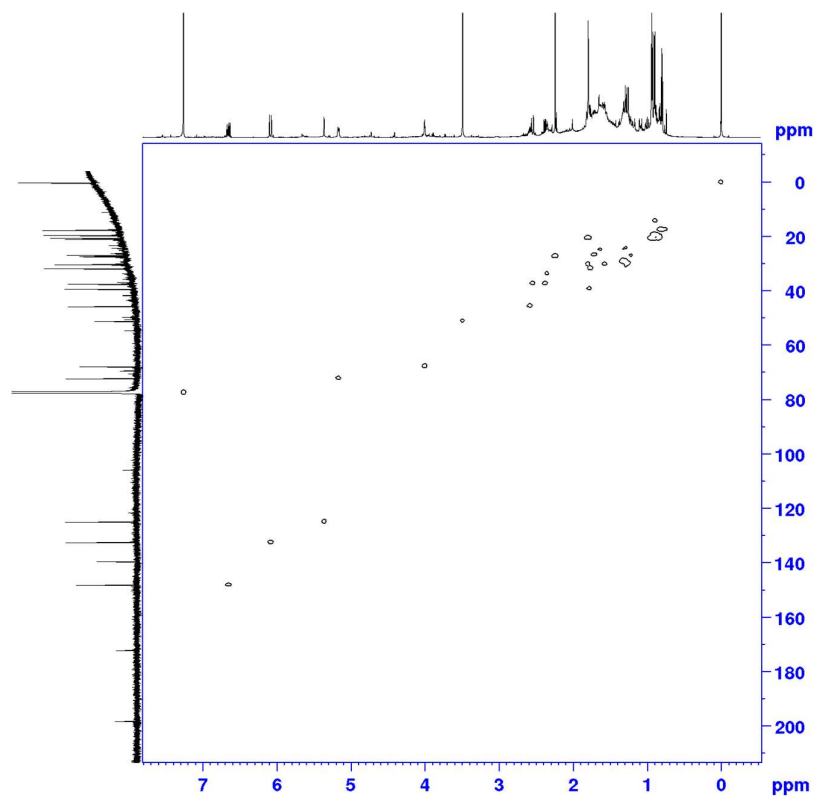

**Figure S55.** The HSQC spectrum of compound **6**

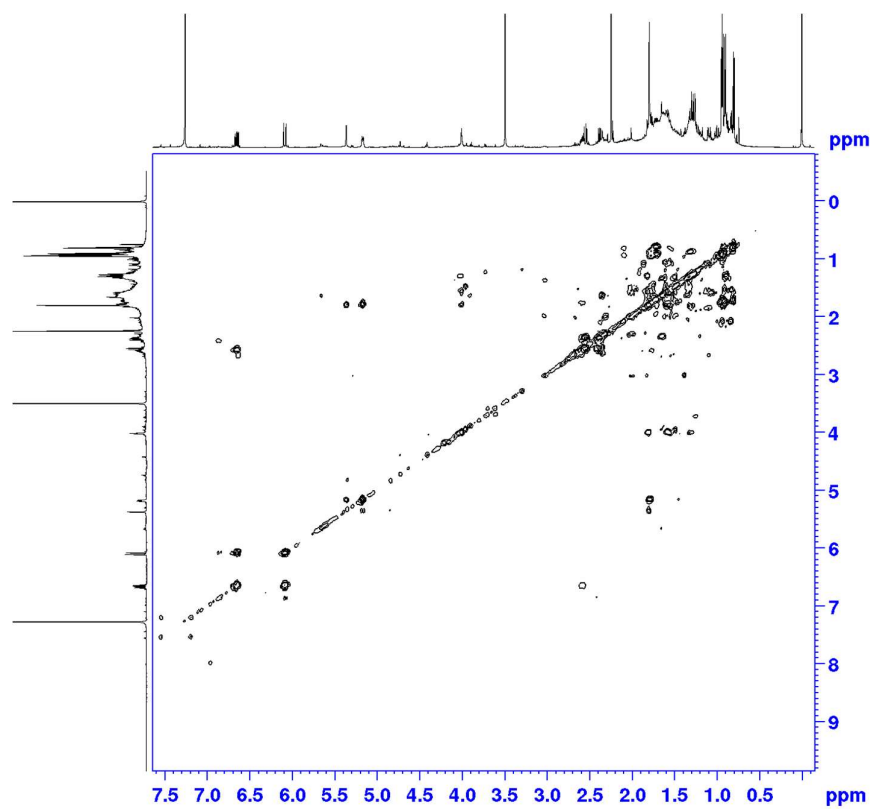

**Figure S56.** The  $^1\text{H}$ - $^1\text{H}$  COSY spectrum of compound **6**

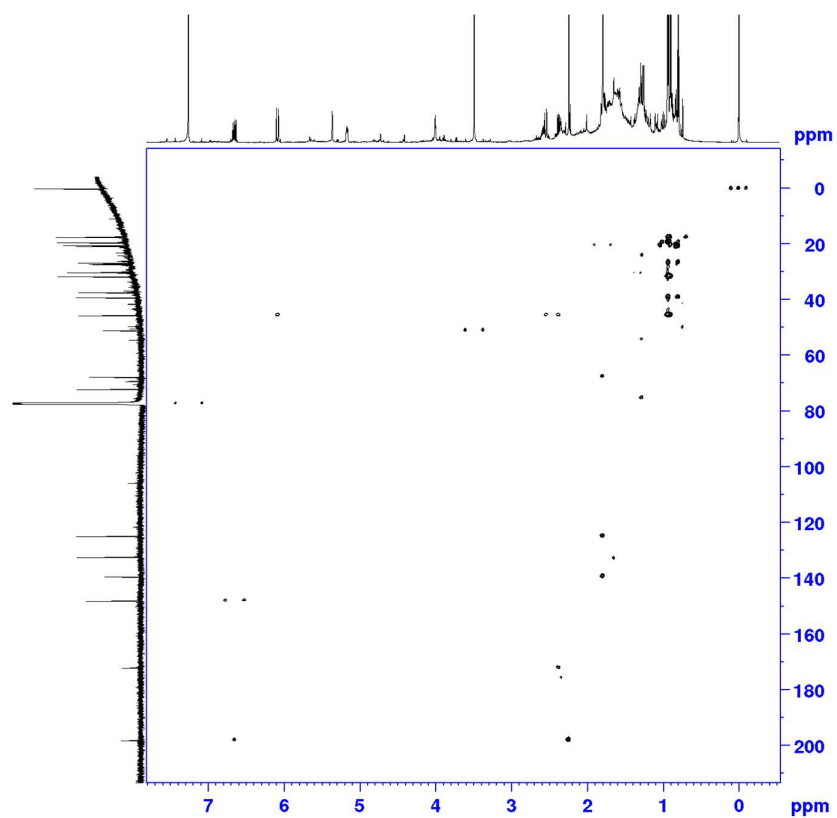

**Figure S57.** The HMBC spectrum of compound **6**

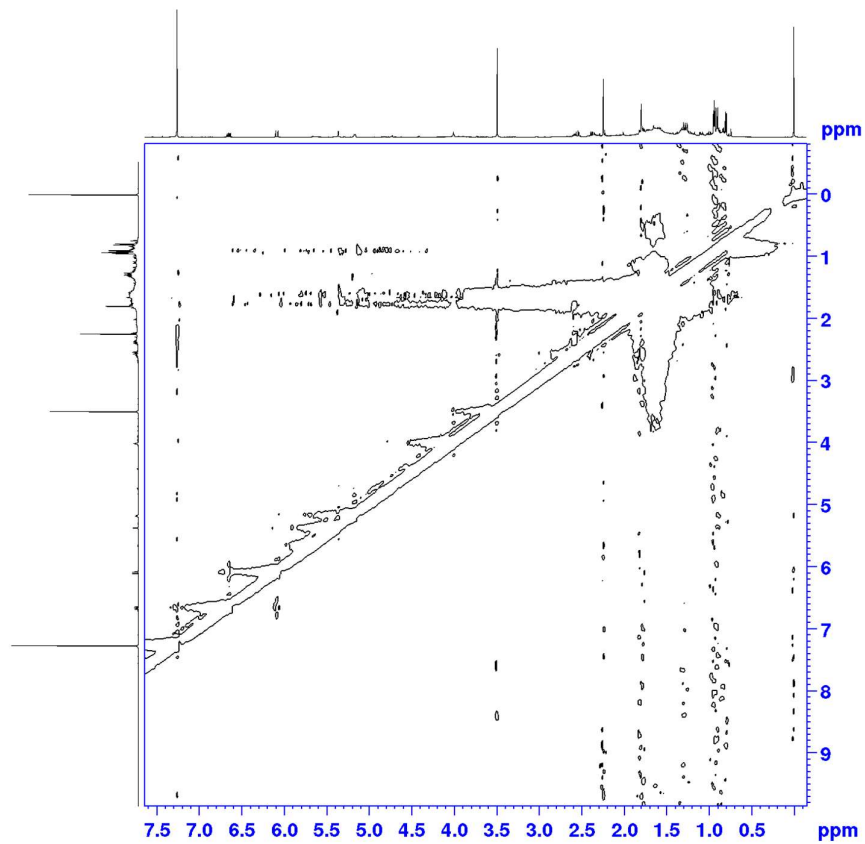

**Figure S58.** The NOESY spectrum of compound **6**

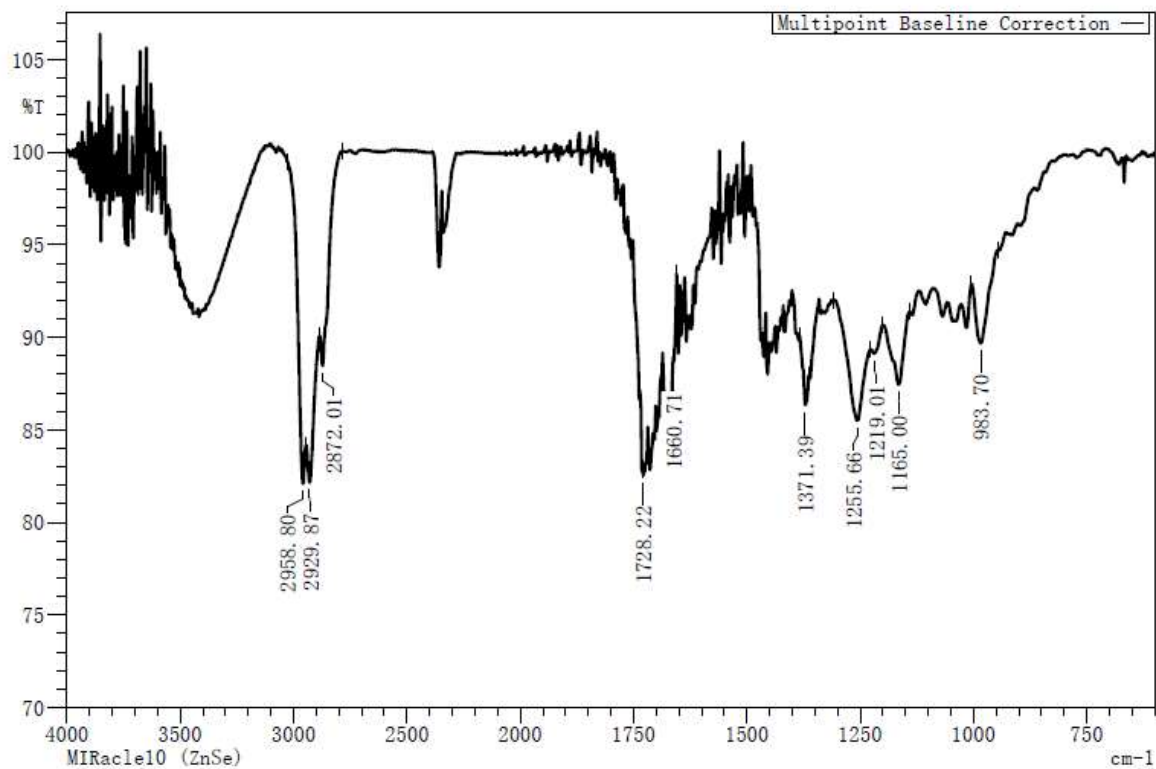

**Figure S59.** The IR spectrum of compound **6**

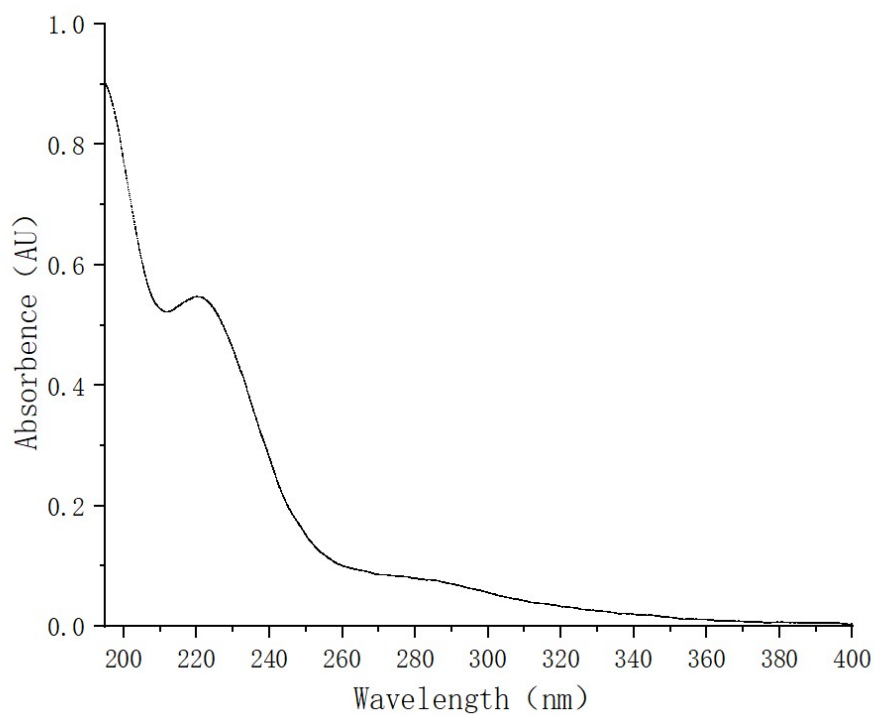

**Figure S60.** The UV spectrum of compound **6**

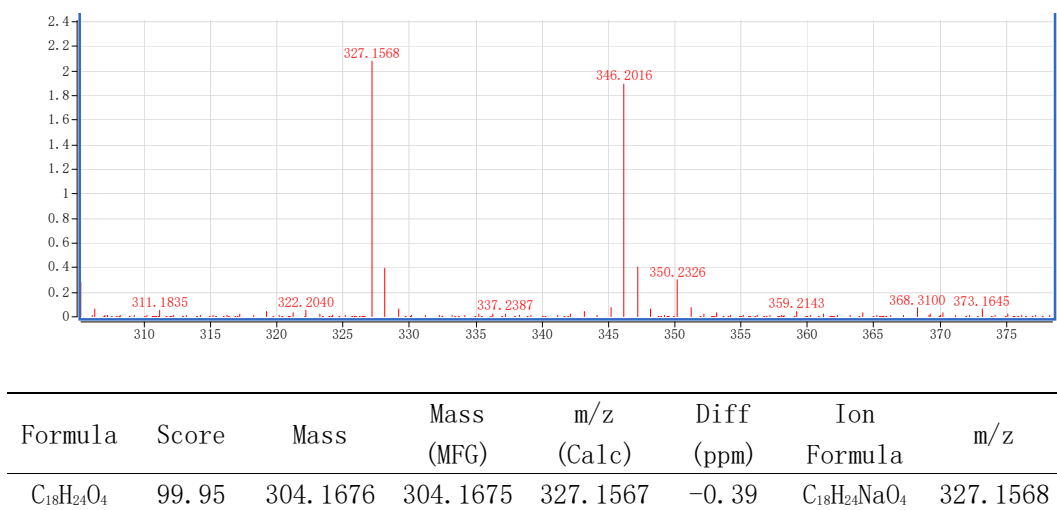

**Figure S61.** The HRESIMS spectrum of compound **7**

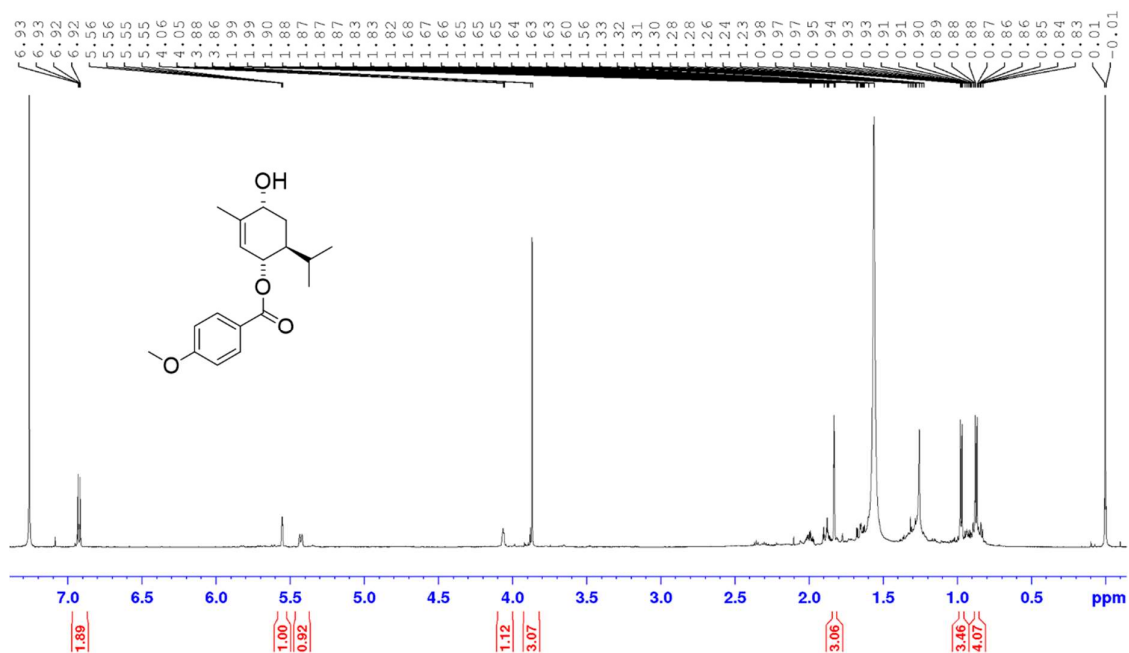

**Figure S62.** The <sup>1</sup>H NMR spectrum of compound **7**

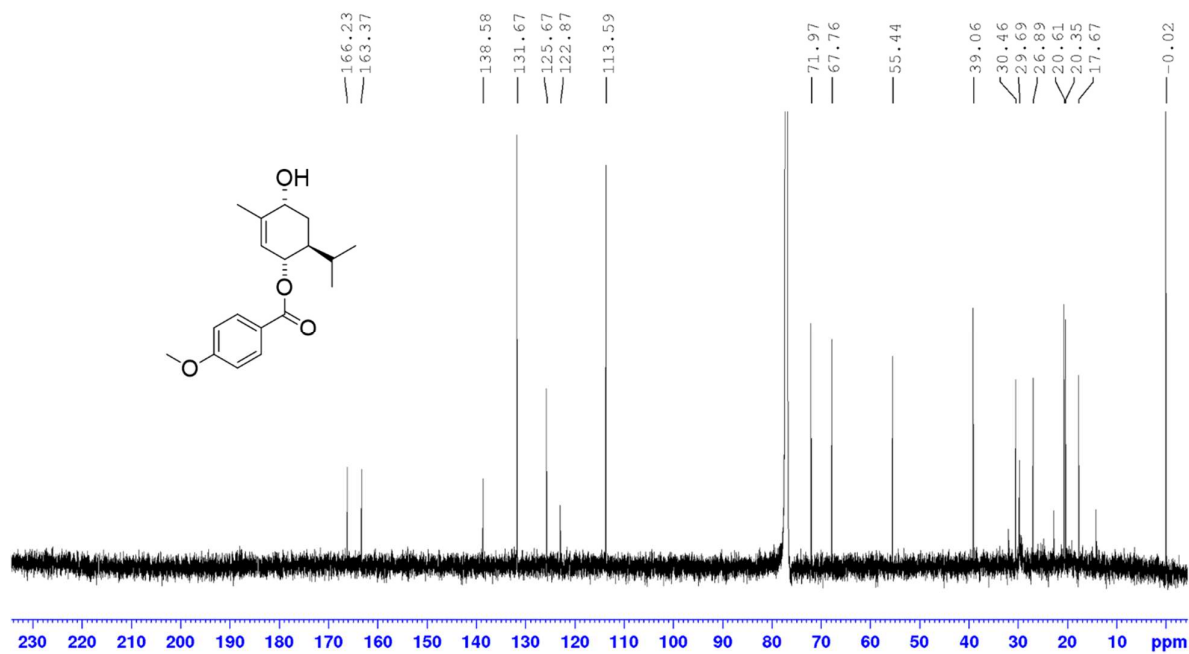

**Figure S63.** The <sup>13</sup>CNMR spectrum of compound **7**

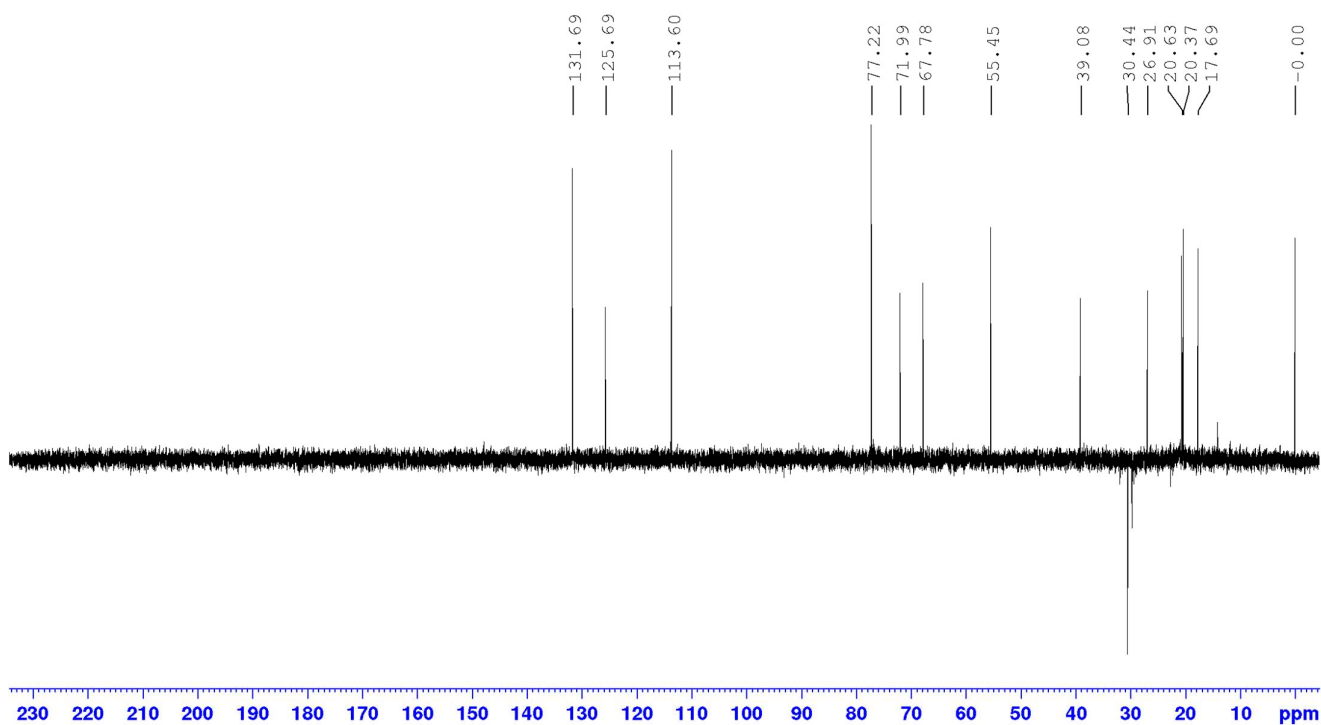

**Figure S64.** The DEPT135 spectrum of compound **7**



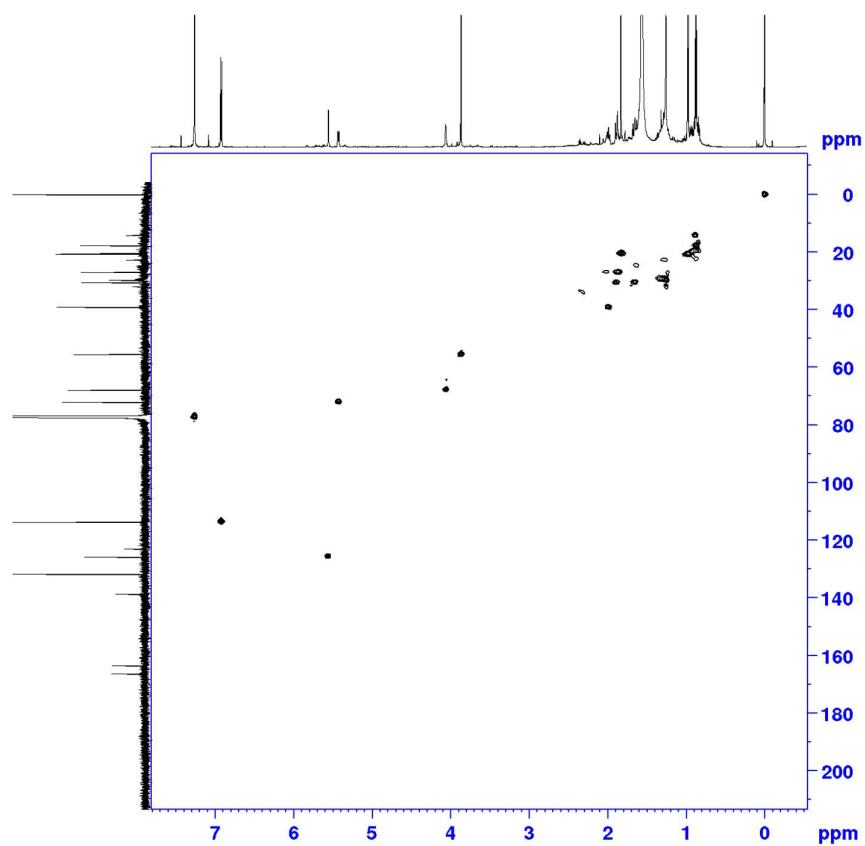

**Figure S65.** The HSQC spectrum of compound **7**

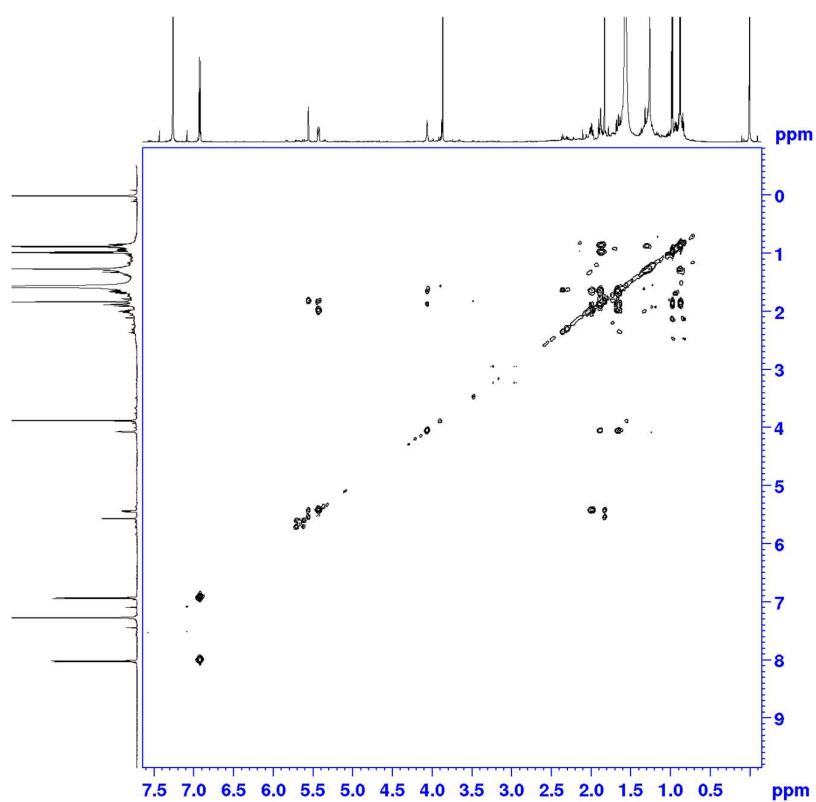

**Figure S66.** The  $^1\text{H}$ - $^1\text{H}$  COSY spectrum of compound **7**

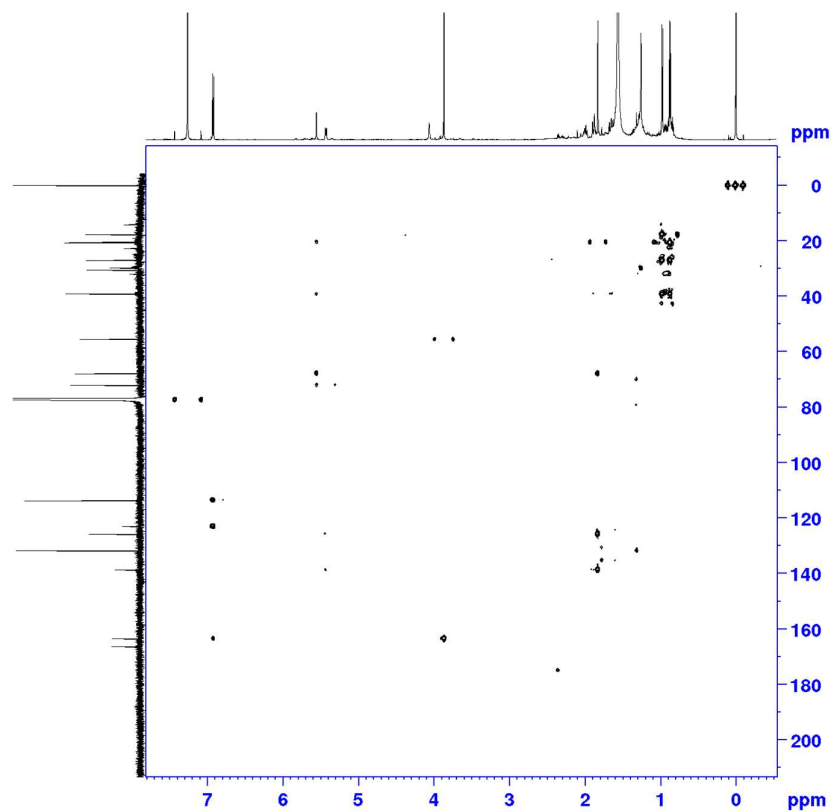

**Figure S67.** The HMBC spectrum of compound **7**

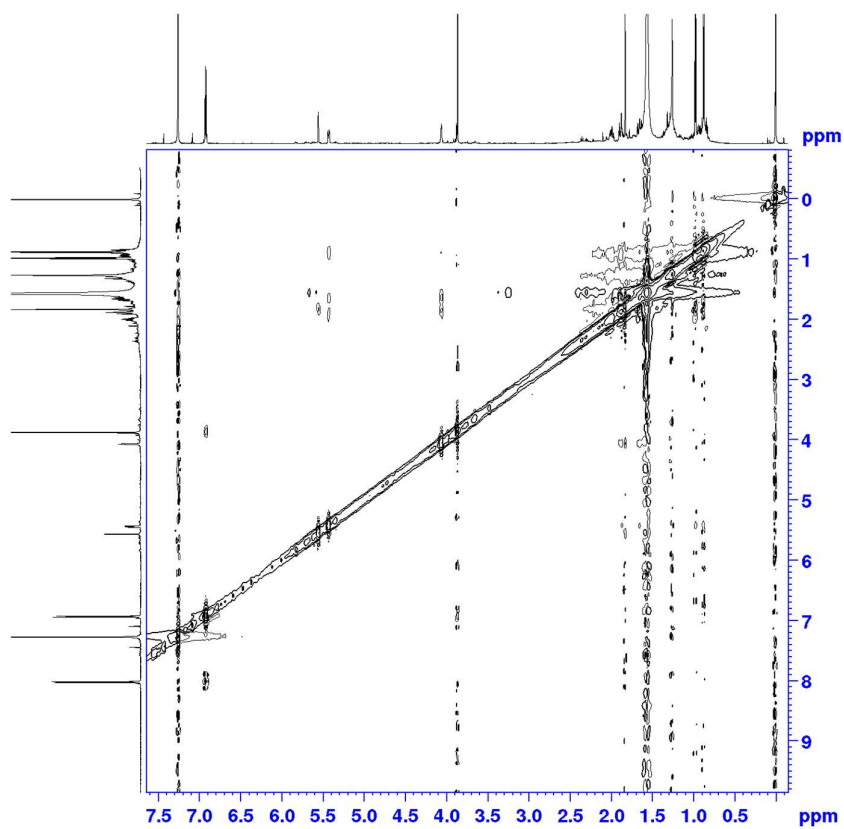

**Figure S68.** The NOESY spectrum of compound **7**

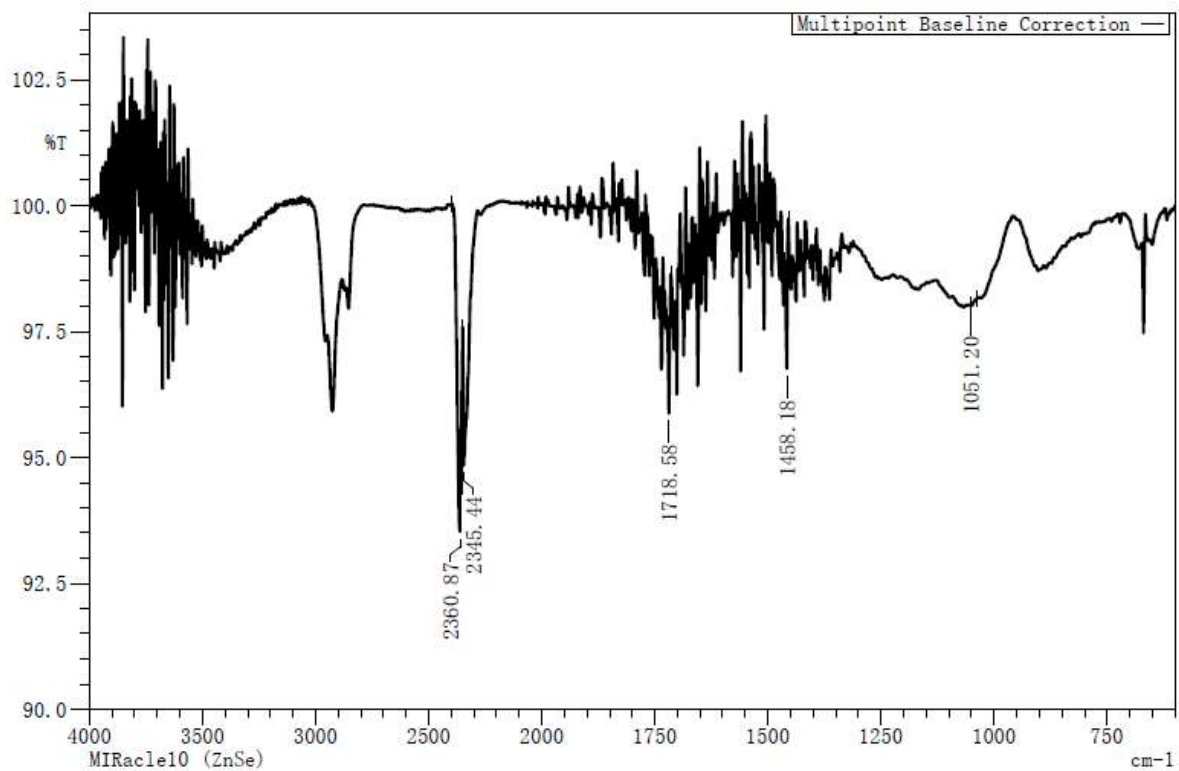

**Figure S69.** The IR spectrum of compound **7**

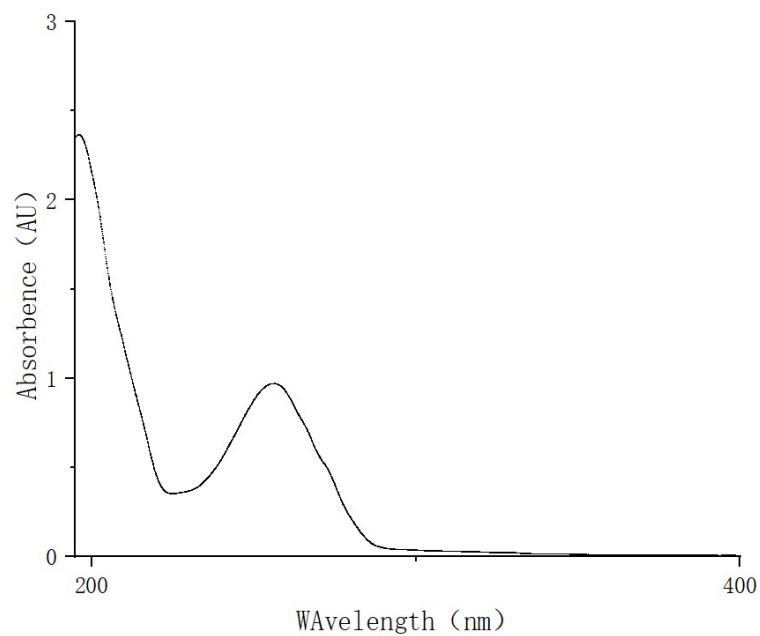

**Figure S70.** The UV spectrum of compound **7**

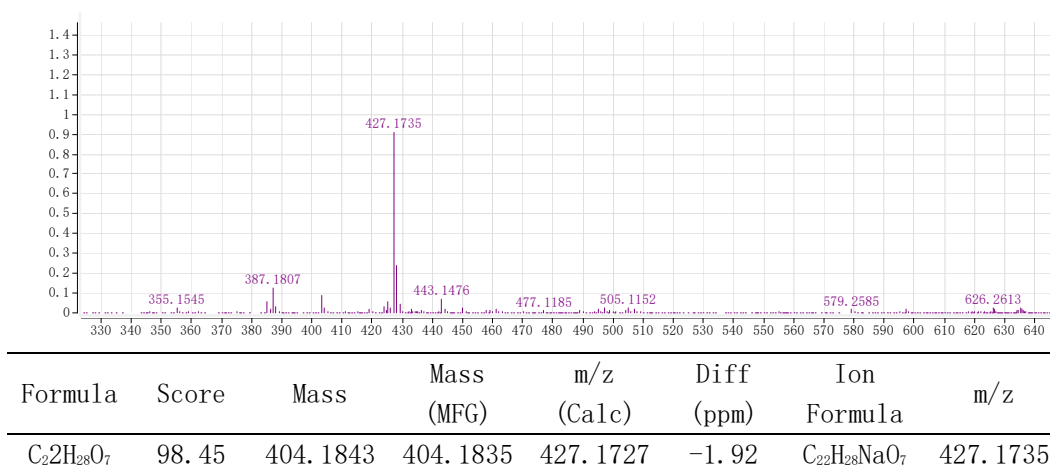

**Figure S71.** The HRESIMS spectrum of compound **8**

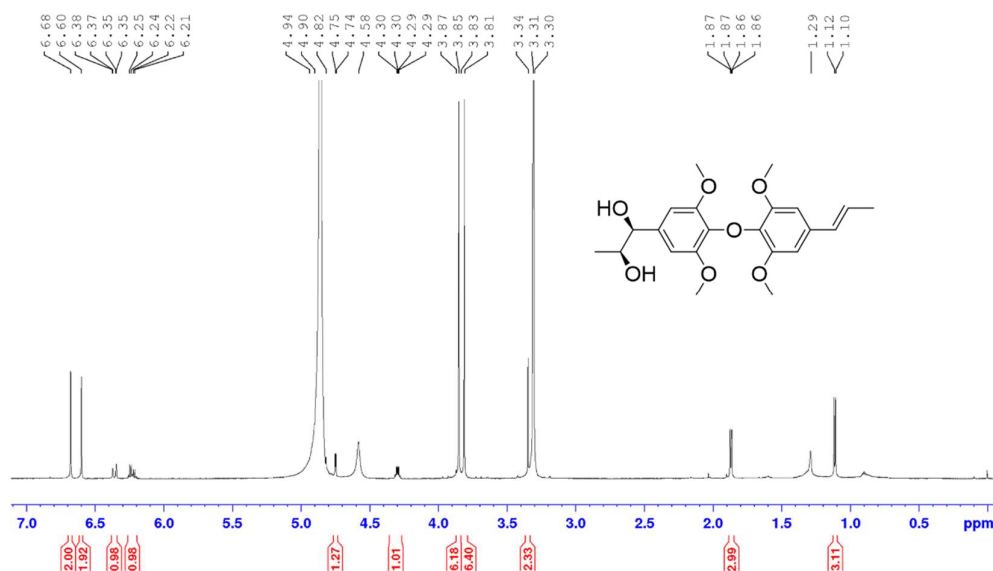

**Figure S72.** The <sup>1</sup>H NMR spectrum of compound **8**

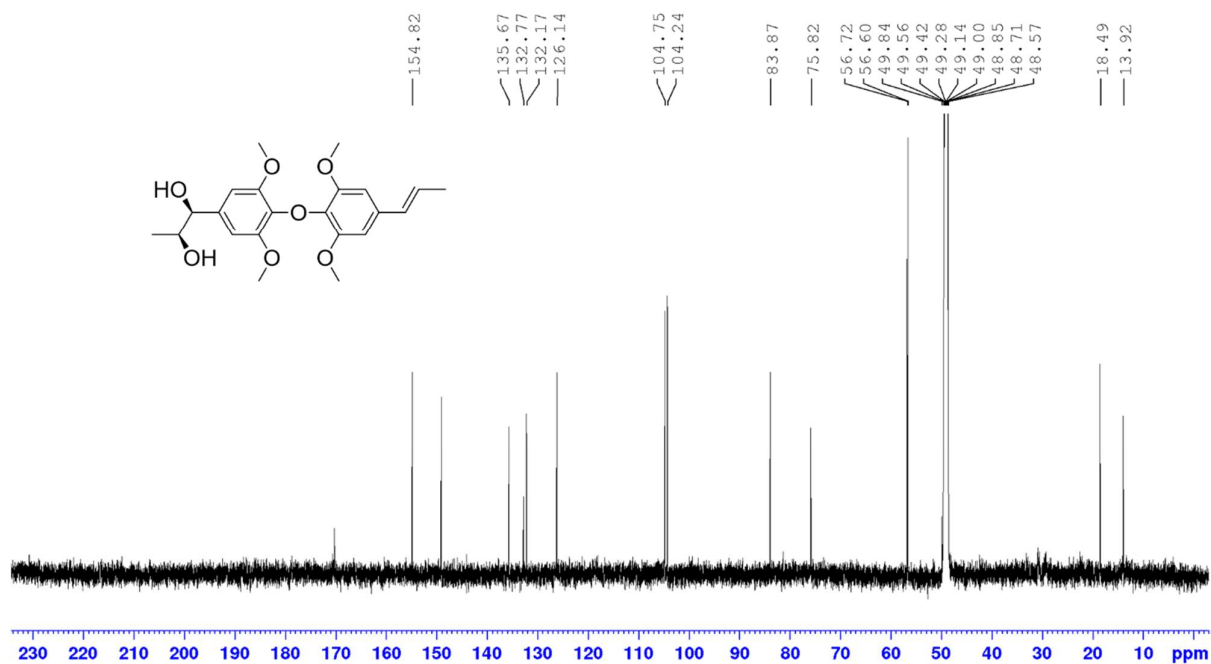

**Figure S73.** The <sup>13</sup>CNMR spectrum of compound **8**

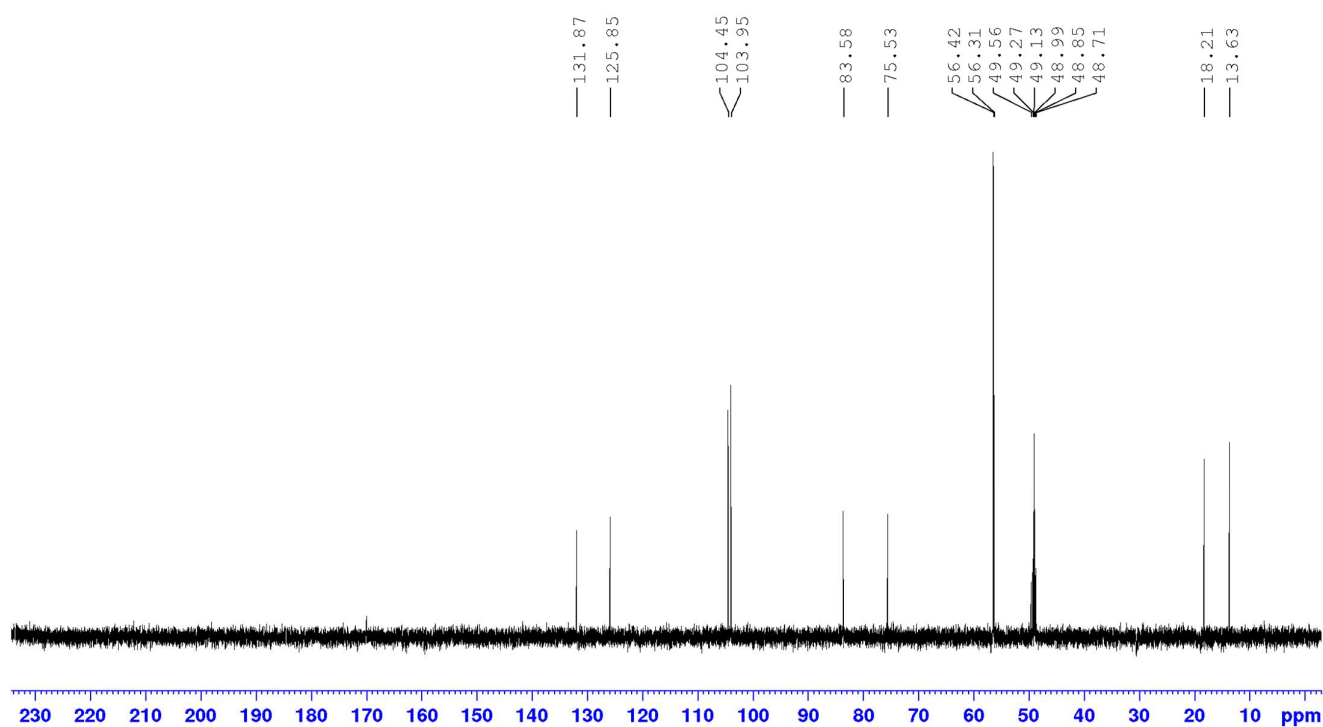

**Figure S74.** The DEPT135 spectrum of compound **8**

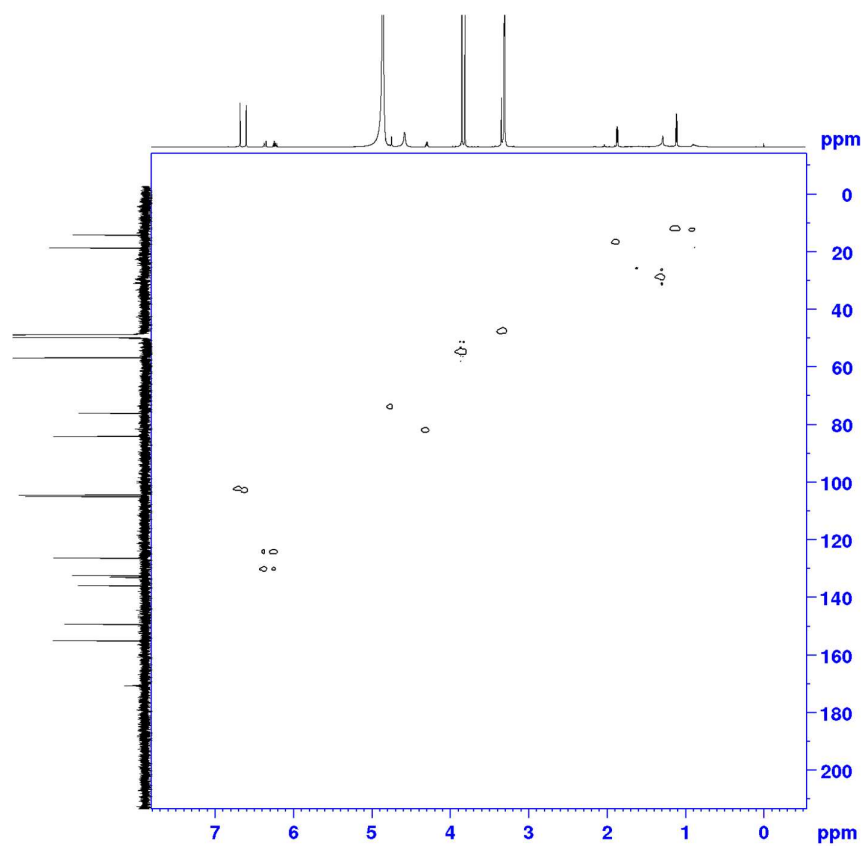

**Figure S75.** The HSQC spectrum of compound **8**

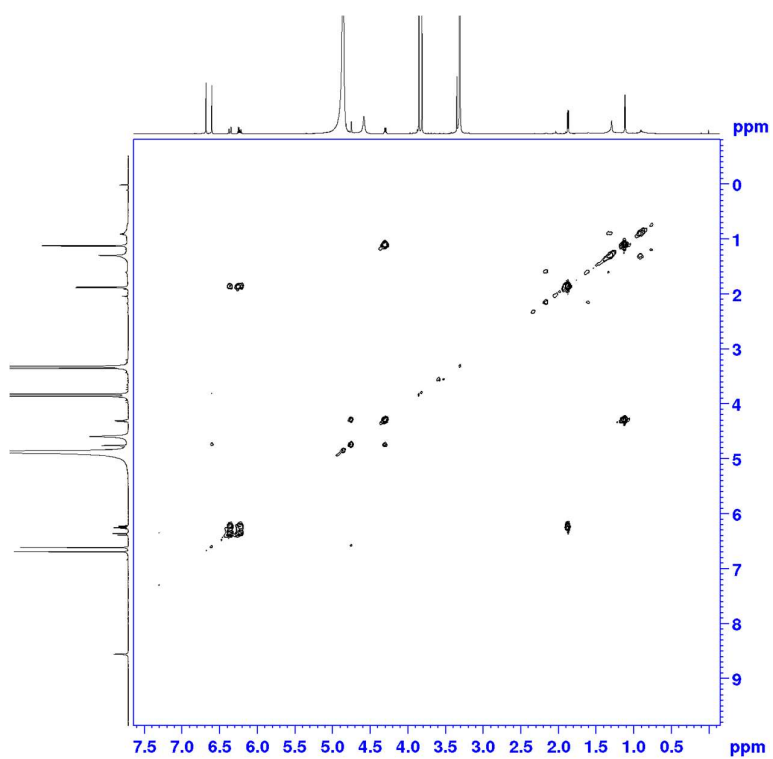

**Figure S76.** The  $^1\text{H}$ - $^1\text{H}$  COSY spectrum of compound **8**

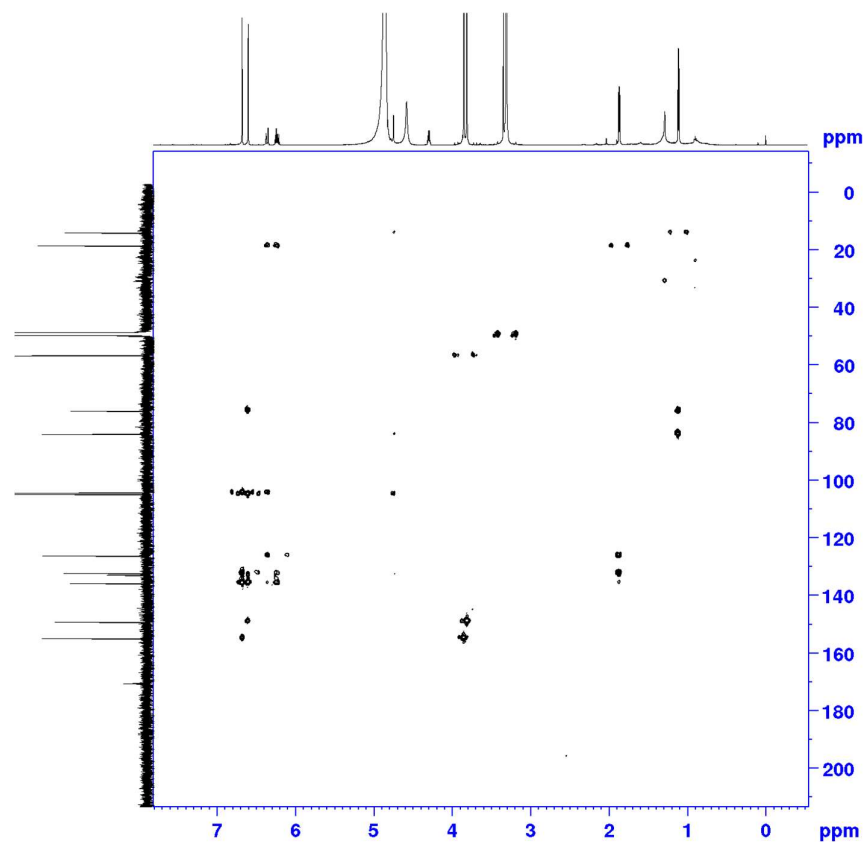

**Figure S77.** The HMBC spectrum of compound **8**

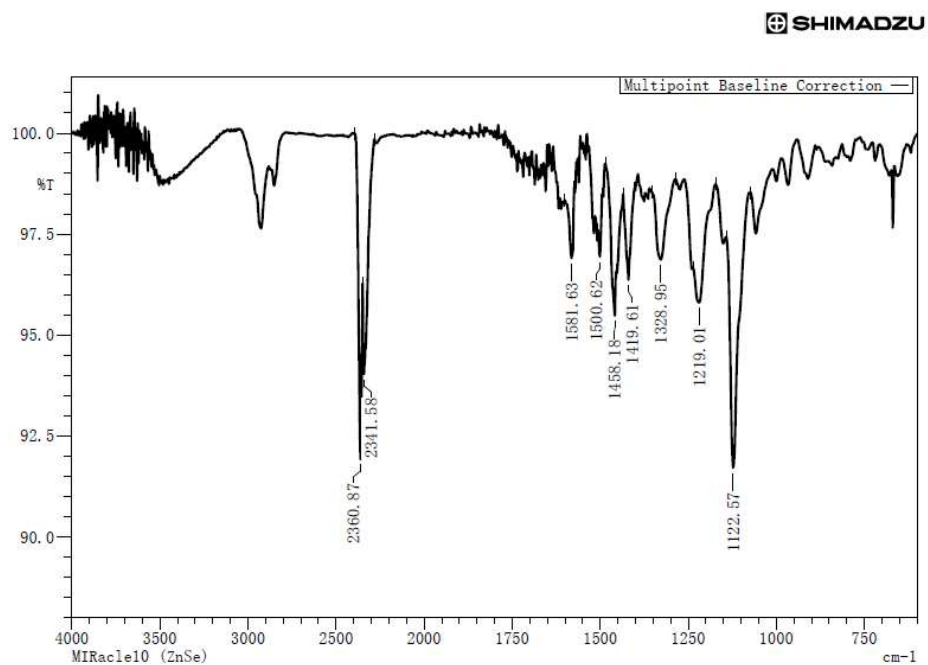

**Figure S78.** The IR spectrum of compound **8**

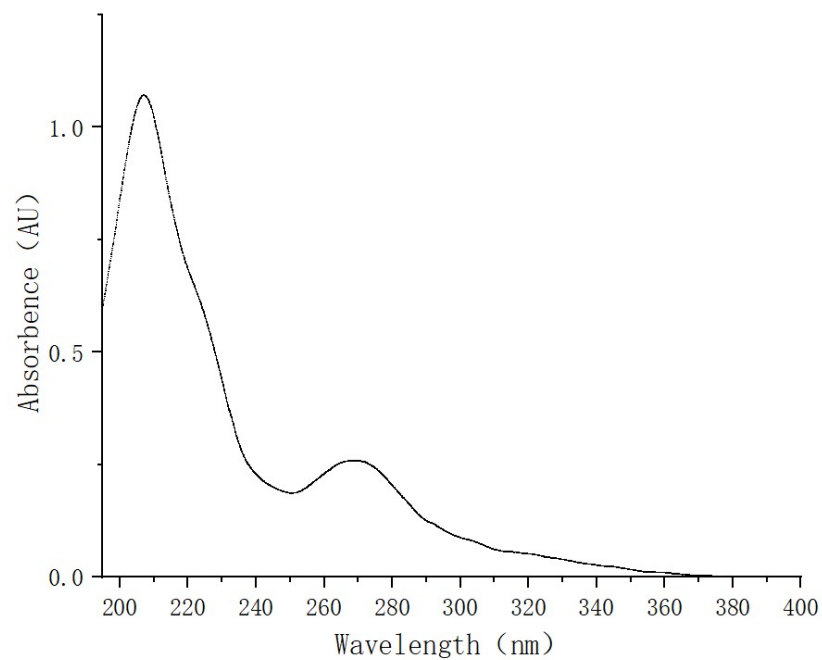

**Figure S79.** The IR spectrum of compound **8**

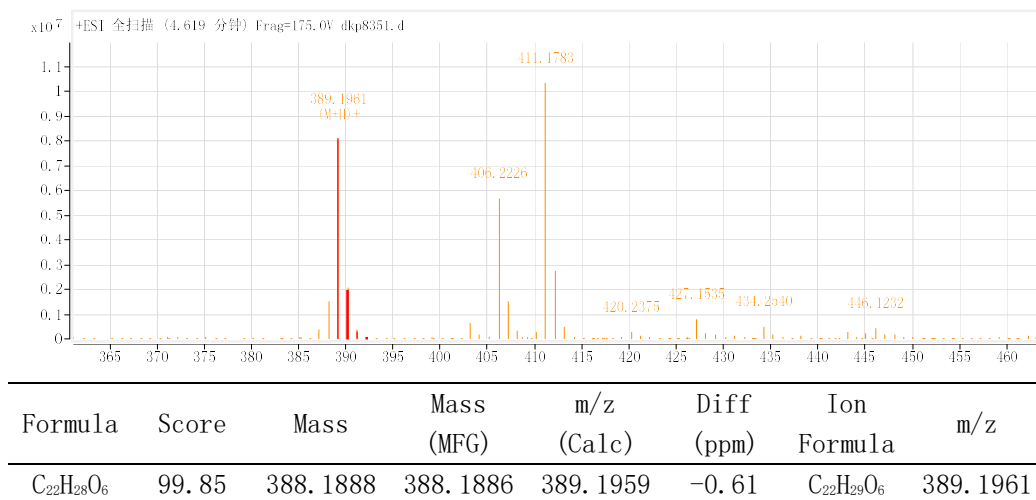

**Figure S80.** The HRESIMS spectrum of compound **9**



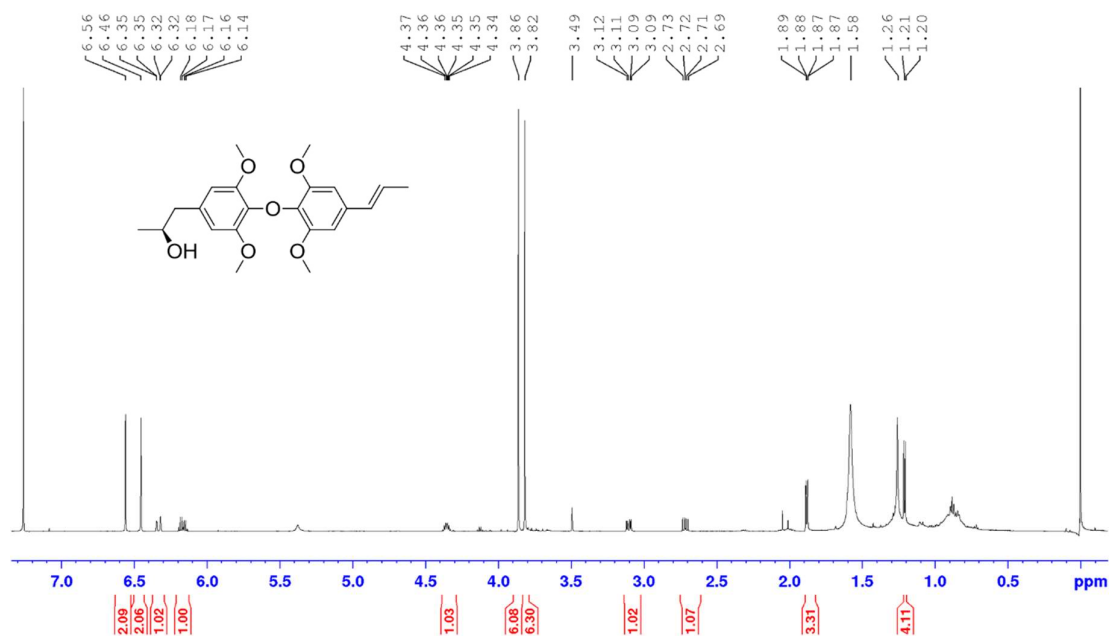

**Figure S81.** The <sup>1</sup>H NMR spectrum of compound **9**

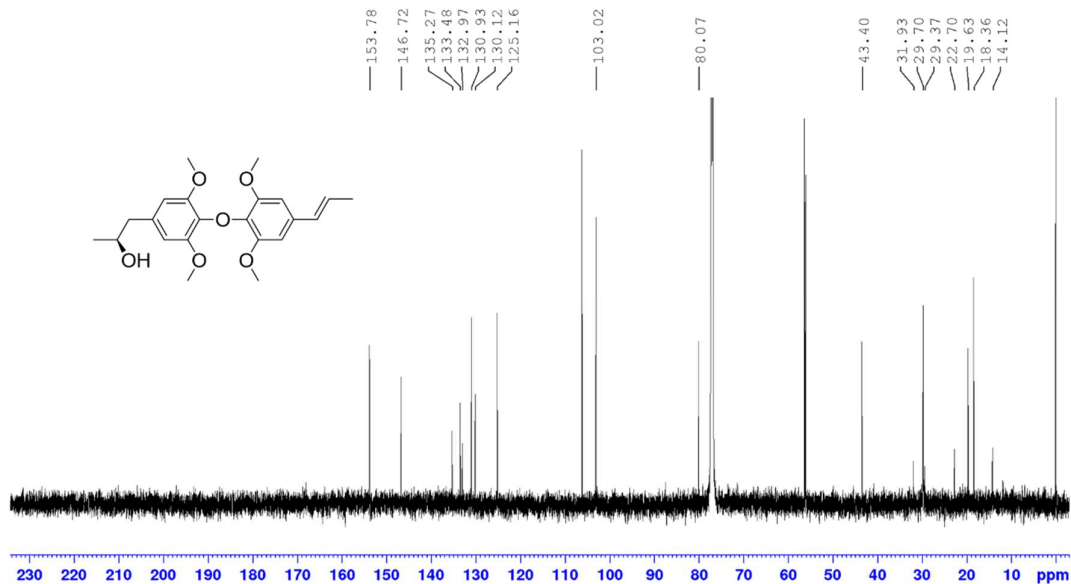

**Figure S82.** The <sup>13</sup>C NMR spectrum of compound **9**

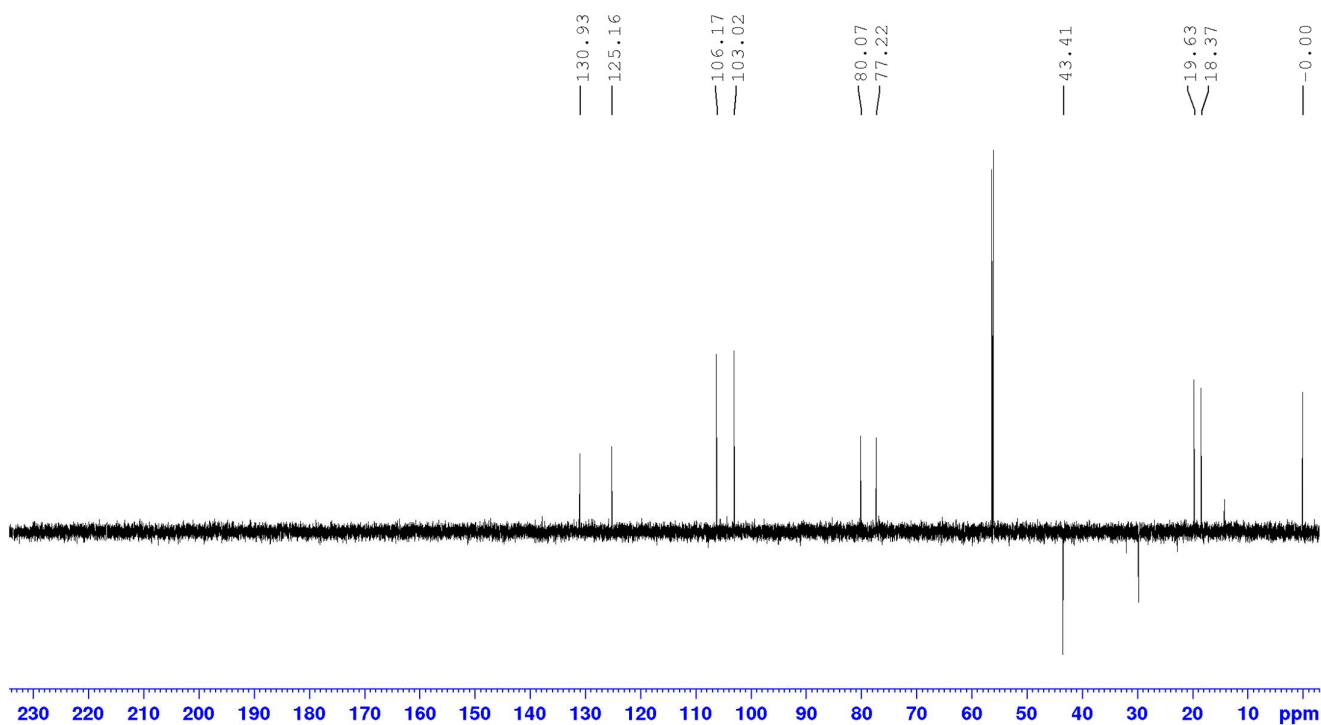

**Figure S83.** The DEPT135 spectrum of compound **9**

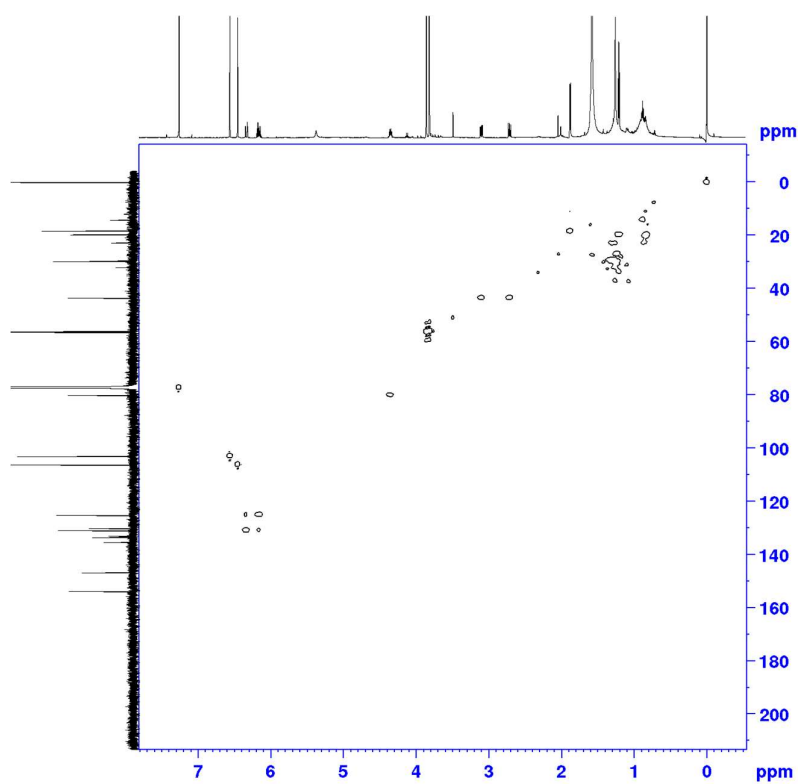

**Figure S84.** The HSQC spectrum of compound **9**

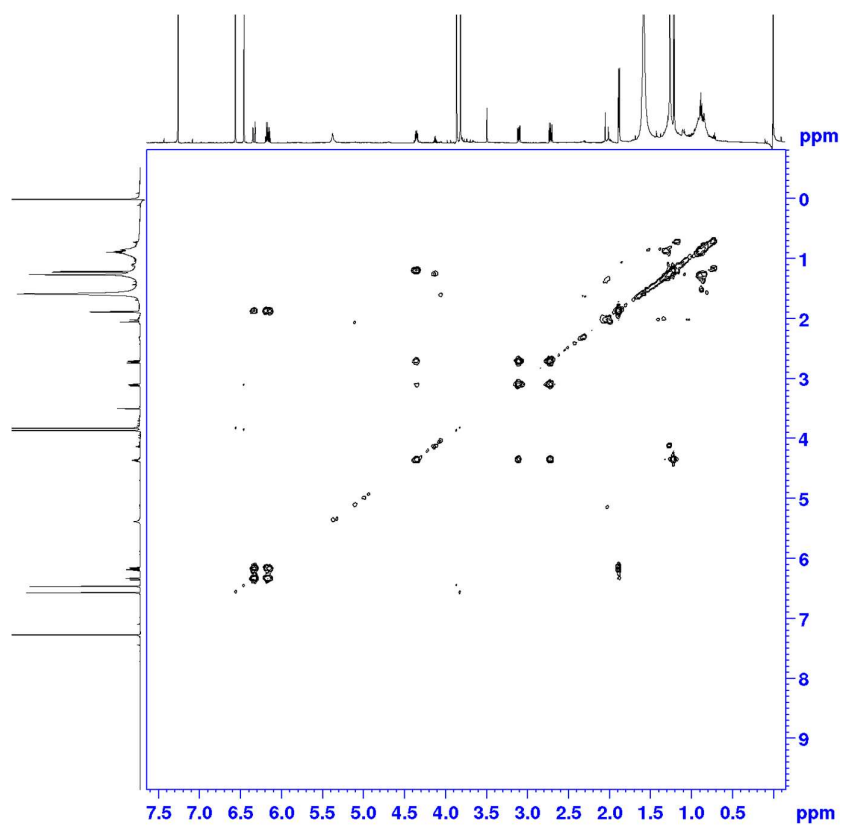

**Figure S85.** The  $^1\text{H}$ - $^1\text{H}$  COSY spectrum of compound **9**

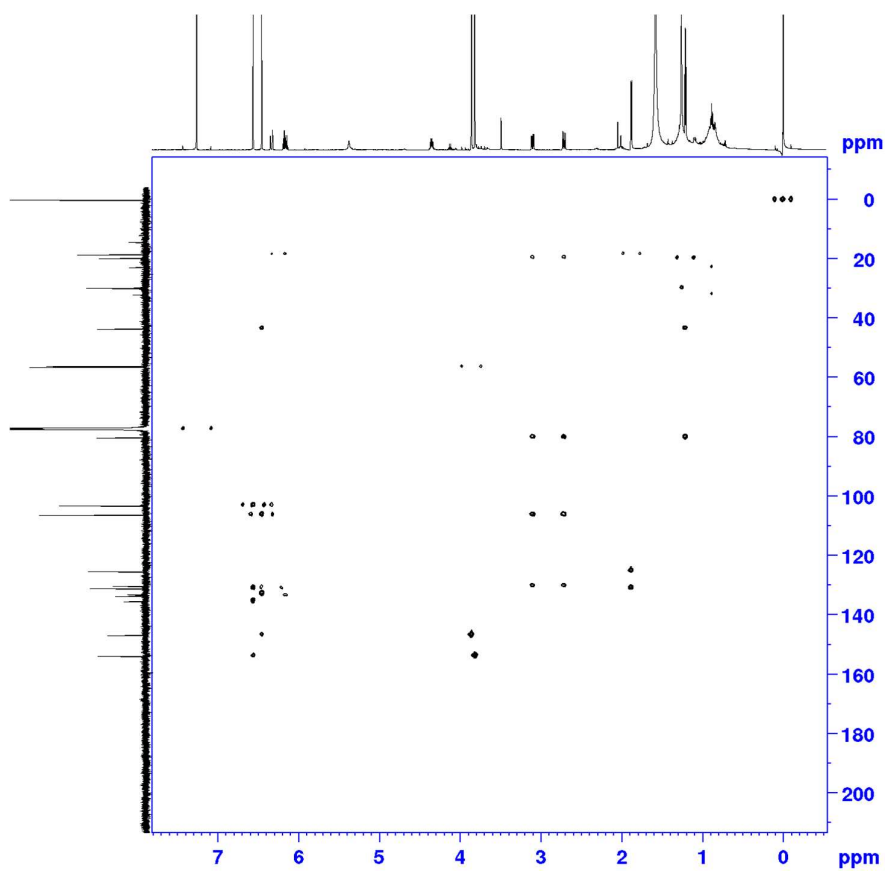

**Figure S86.** The HMBC spectrum of compound **9**

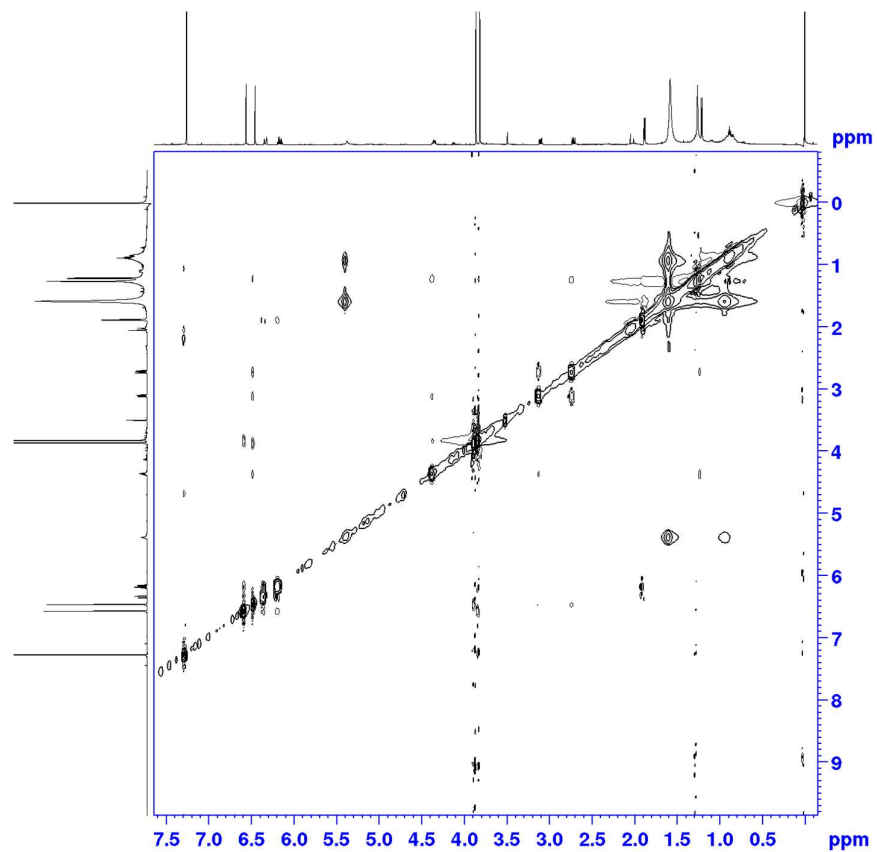

**Figure S87.** The NOESY spectrum of compound **9**

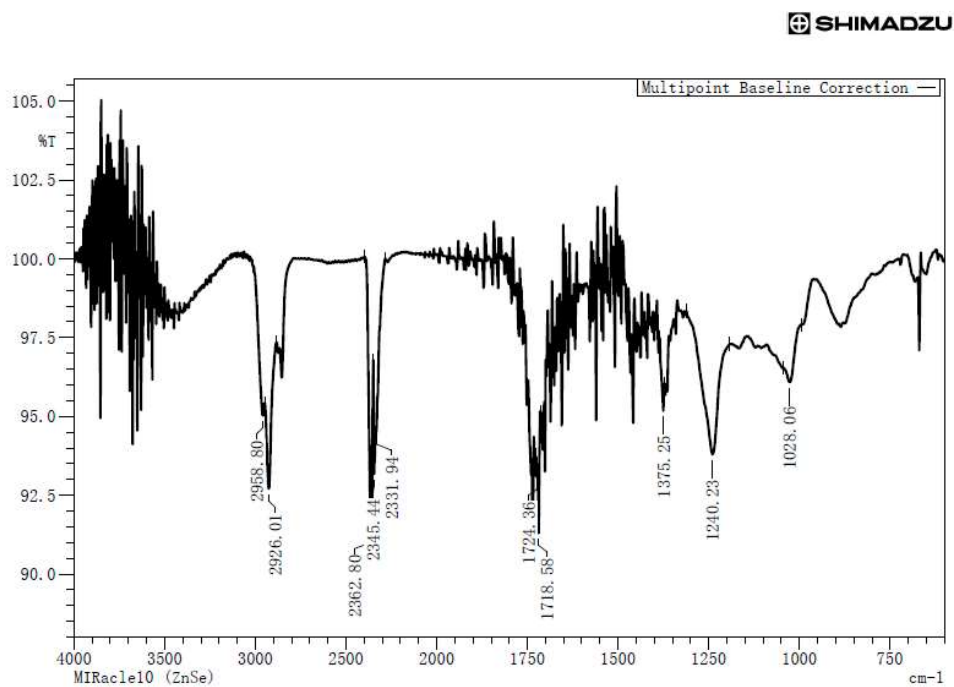

**Figure S88.** The IR spectrum of compound **9**

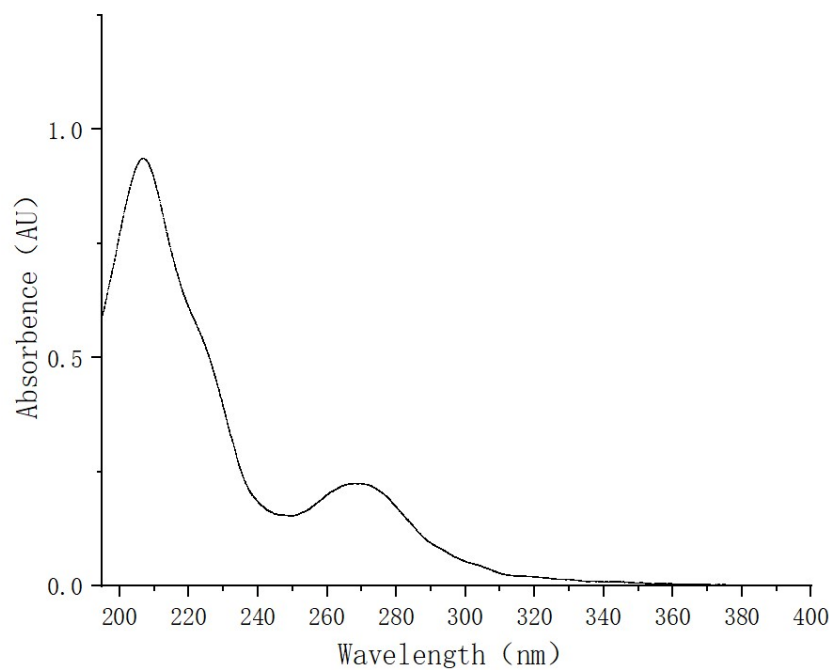

**Figure S89.** The UV spectrum of compound **9**

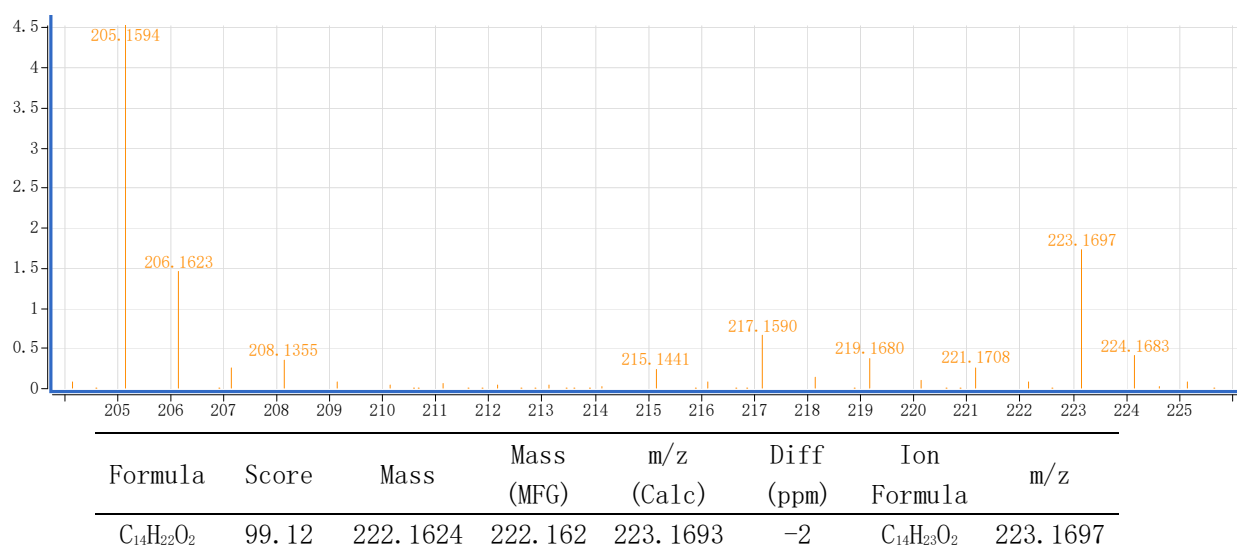

**Figure S90.** The HRESIMS spectrum of compound **10**

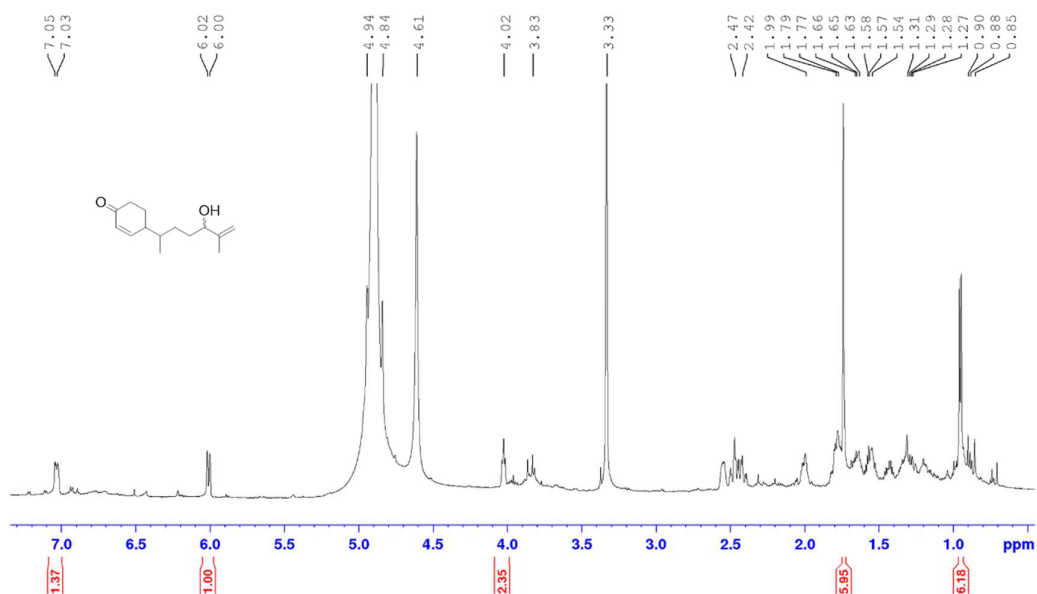

**Figure S91.** The <sup>1</sup>H NMR spectrum of compound **10**

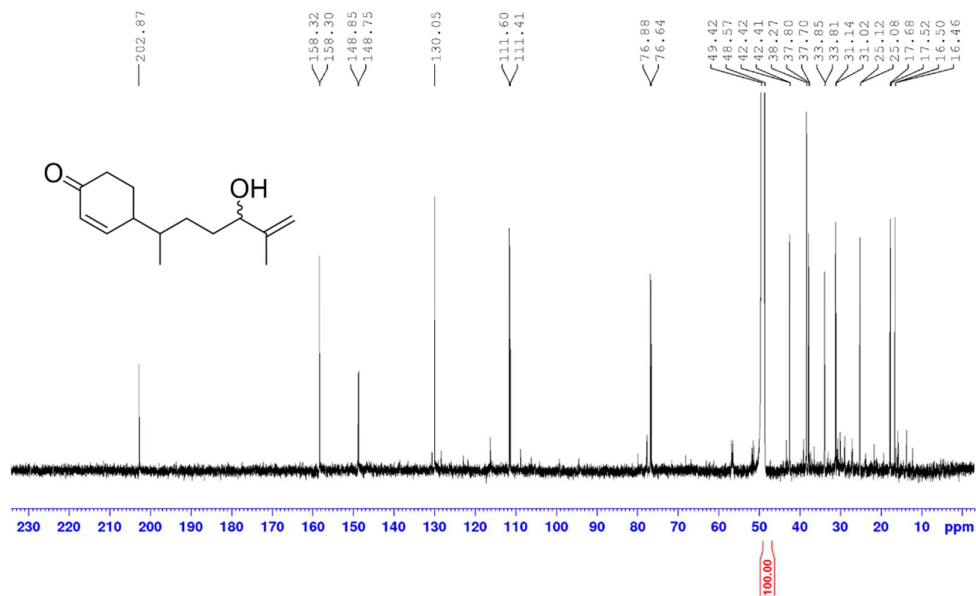

**Figure S92.** The <sup>13</sup>C NMR spectrum of compound **10**

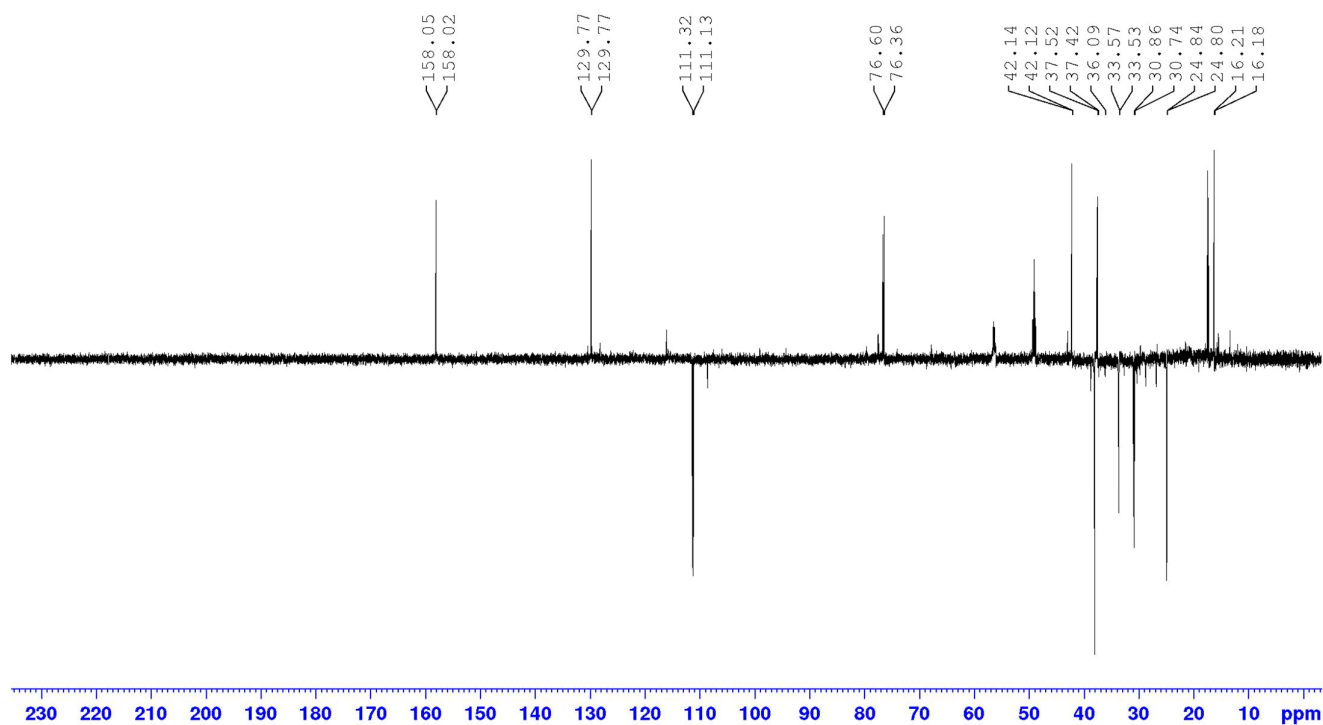

**Figure S93.** The DEPT135 spectrum of compound **10**

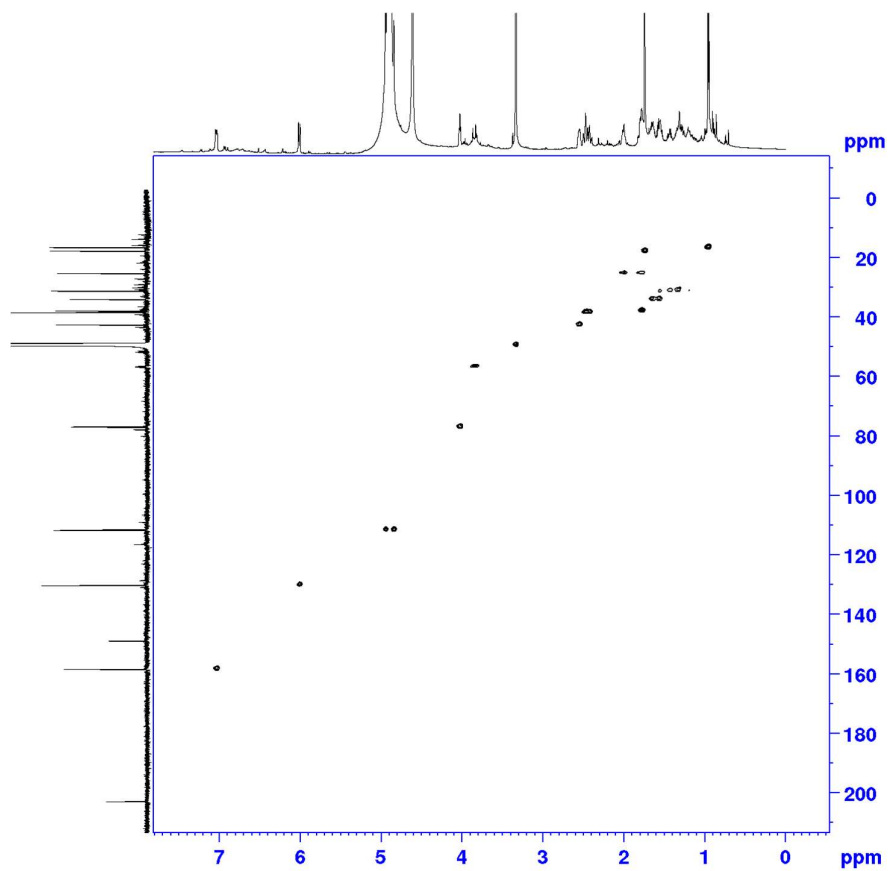

**Figure S94.** The HSQC spectrum of compound **10**

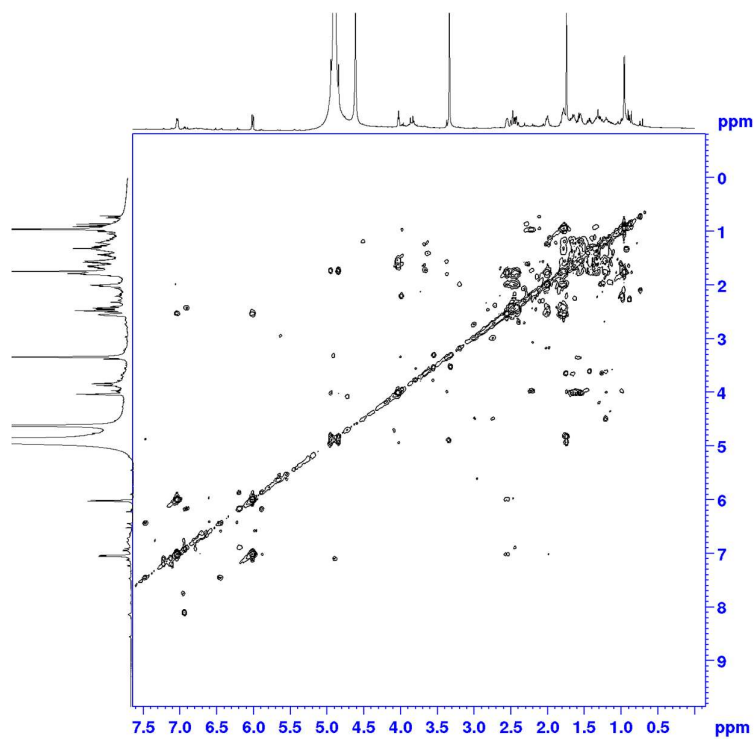

**Figure S95.** The  $^1\text{H}$ - $^1\text{H}$  COSY spectrum of compound **10**

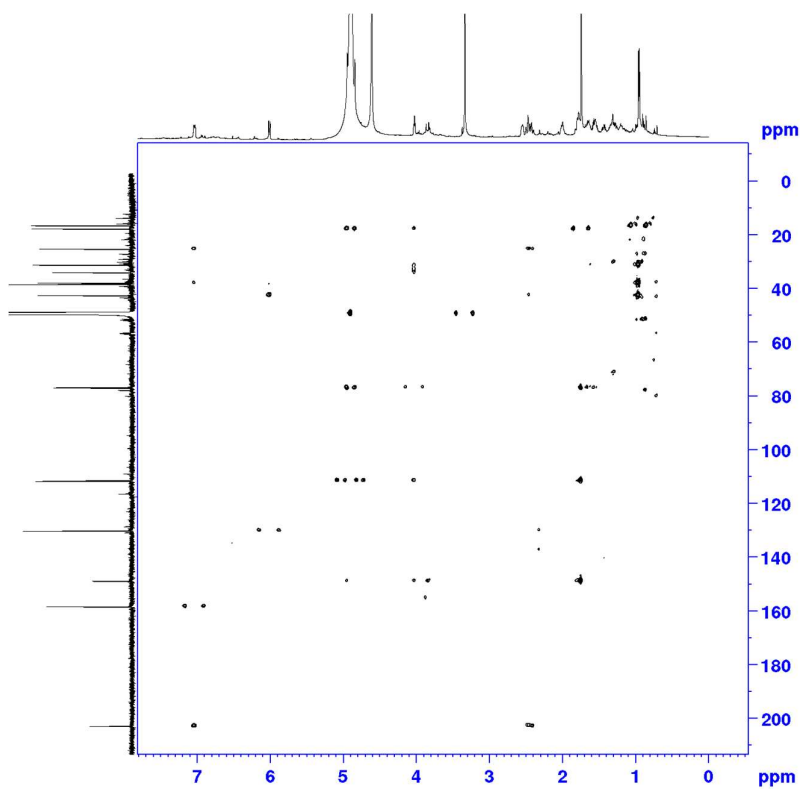

**Figure S96.** The HMBC spectrum of compound **10**



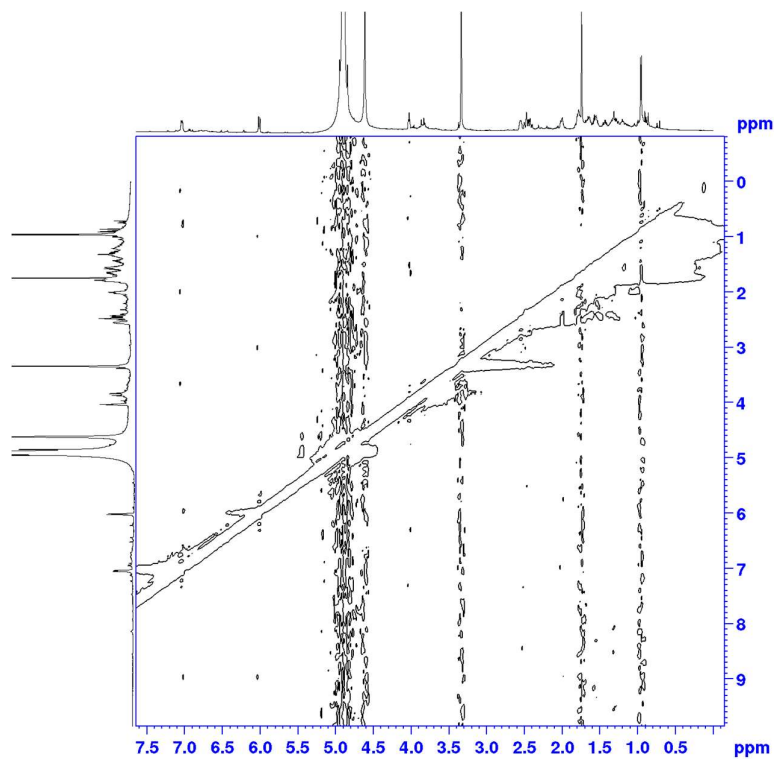

**Figure S97.** The NOESY spectrum of compound **10**

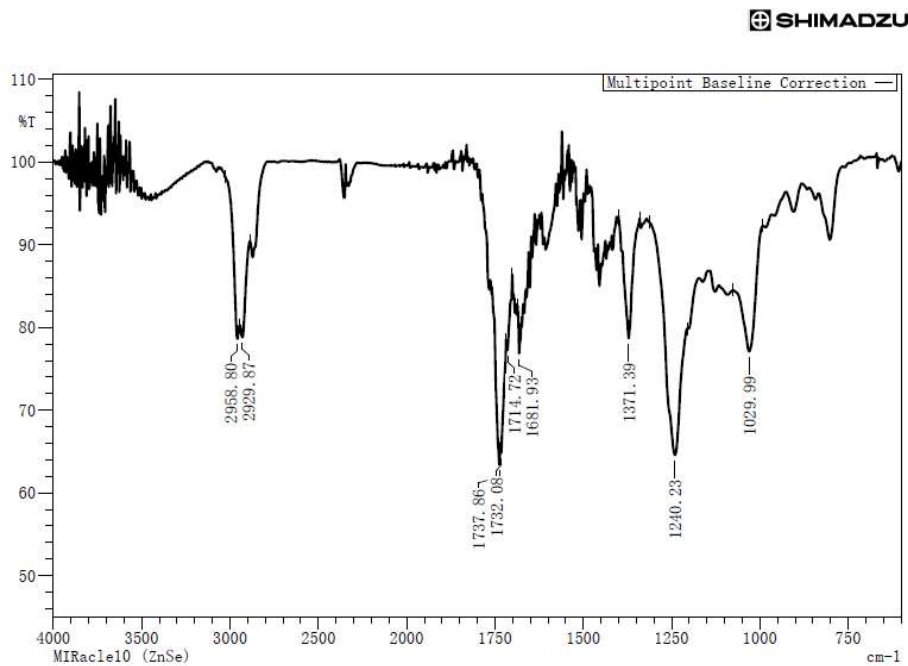

**Figure S98.** The IR spectrum of compound **10**

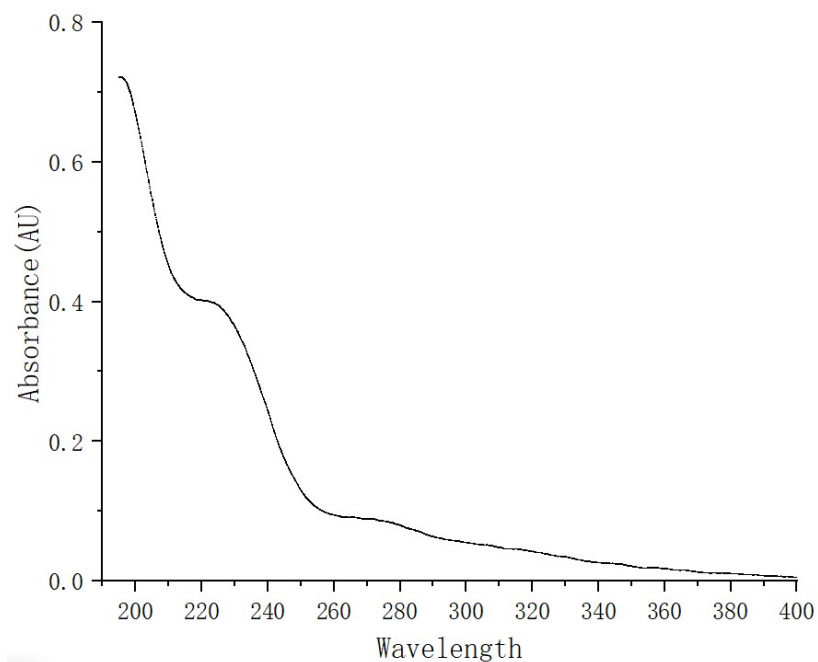

**Figure S99.** The UV spectrum of compound **10**

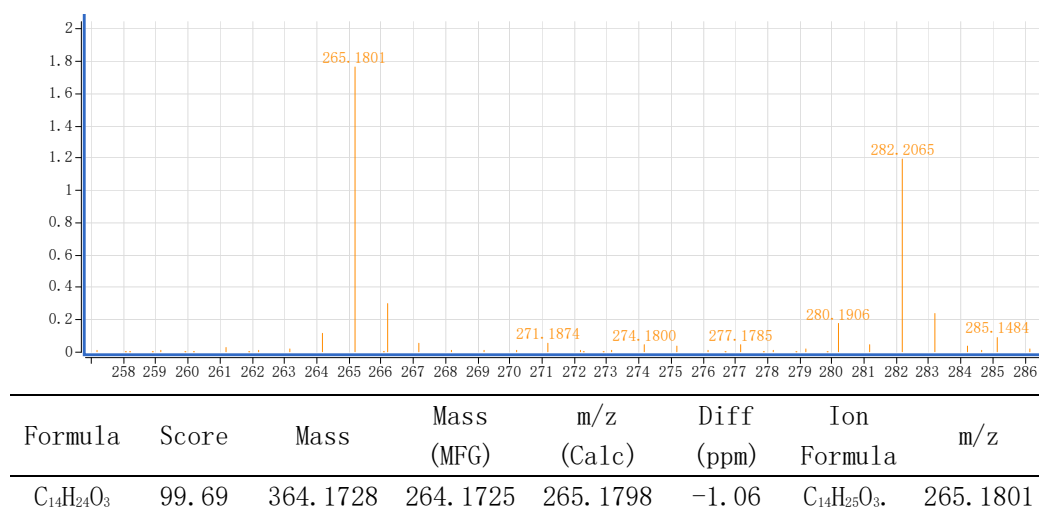

**Figure S100.** The HRESIMS spectrum of compound **10a**

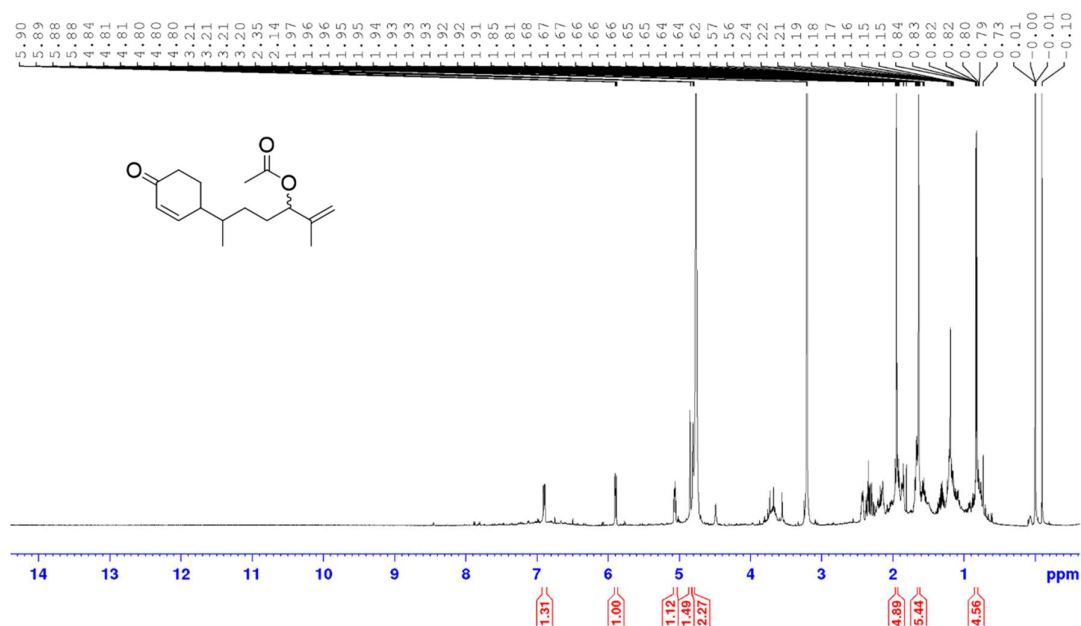

**Figure S101.** The <sup>1</sup>H NMR spectrum of compound 10a

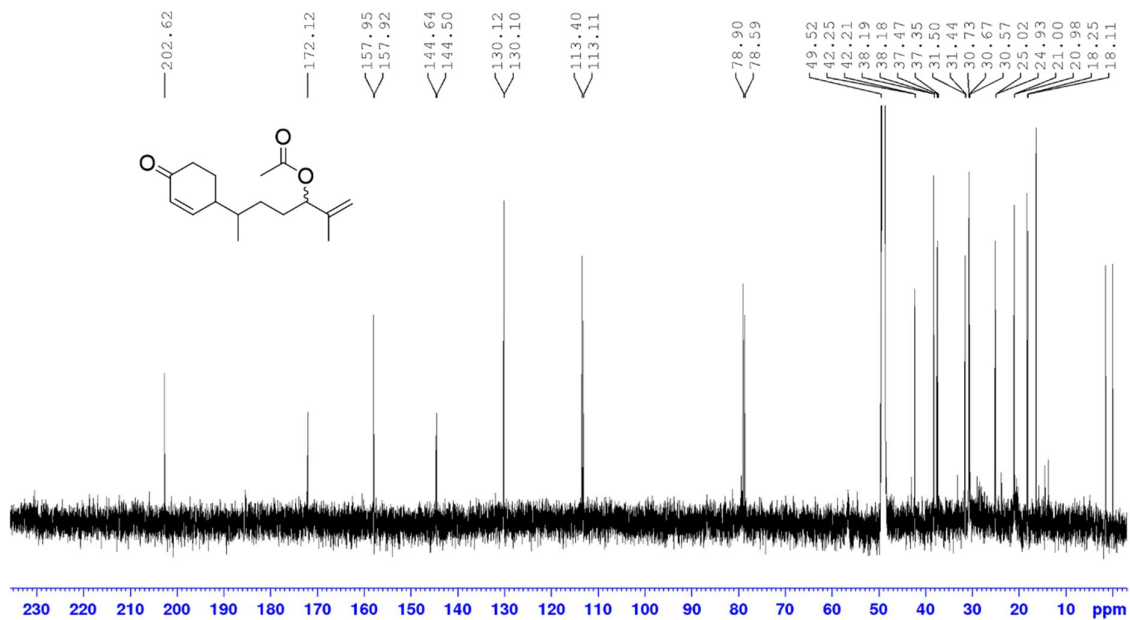

**Figure S102.** The <sup>13</sup>C NMR spectrum of compound 10a

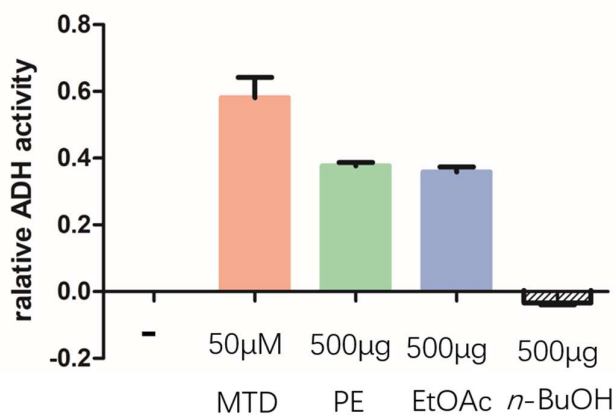

**Figure S103.** The effects of PE, EtOAc, and *n*-BuOH extracts on ADH activity.

**Table S1.**  $^1\text{H}$ -NMR (600 MHz) and  $^{13}\text{C}$ -NMR (150 MHz) data of compound **10a**.

| <b>10a</b> (MeOD)   |                     |
|---------------------|---------------------|
| $\delta_{\text{C}}$ | $\delta_{\text{H}}$ |
| 202.8               |                     |
| 129.9               | 5.89, dd, 2.9, 10.5 |
| 158.1               | 6.89, brd, 10.5     |
| 42.2                | 2.43, m             |
| 25.0 (25.1)         | 1.84, 1.64, m       |
| 38.2                | 2.31, dd, 5.0, 12.6 |
|                     | 2.36, dt, 4.0, 12.6 |
| 37.7 (37.8)         | 1.67, m             |
| 30.5                | 1.32, 1.19, m       |
| 31.5 (31.6)         | 1.65, 1.57, m       |
| 79.3 (79.3)         | 5.06, m             |
| 148.7 (148.8)       |                     |
| 18.0 (18.1)         | 1.63, s             |
| 113.4 (113.6)       | 4.83, brs           |
|                     | 4.94, brs           |
| 16.2                | 0.83, d, 6.9        |
| 172.2               |                     |
| 21.0                | 1.94, s             |
